# Supplementary material for: Design, synthesis and bioactivity of myricetin derivatives for control of fungal disease and tobacco mosaic virus disease
Source: Royal Society of Chemistry journal article supplement (doi:10.1039/d2ra08176h), 2023-01-01
Supplement: d2ra08176h1.pdf [file d2ra08176h1.pdf]

Design, Synthesis and Bioactivity of Myricetin Derivatives for Control of Fungal

Disease and Tobacco Mosaic virus Disease

Xiao Cao, Bangcan He, Fang Liu, Yuanquan Zhang, Li Xing, Nian Zhang, Yuanxiang Zhou, Chenyu

Gong and Wei Xue\*

National Key Laboratory of Green Pesticide, Key Laboratory of Green Pesticide and Agricultural

Bioengineering, Ministry of Education, Center for R&D of Fine Chemicals of Guizhou University,

Guiyang, 550025, China.

\*Corresponding author: Tel.: 0086-851-88292090, Fax: 0086-851-88292090,

E-mail: wxue@gzu.edu.cn (Wei Xue)

## Contents

1. Abbreviation
2. Chemical synthesis
3. Biological activities tests
4. Spectral data of compounds **Y1-Y28**
5. High performance liquid chromatography of target compound **Y1**
6. Microstructure and appearance state diagram of target compound **Y1**
7. **Table S1.** *In vitro* antifungal activity of target compounds **Y1-Y28** at 100  $\mu\text{g}/\text{mL}$

## 1. Abbreviation

|    | Abbreviation           | Full-name                                  |
|----|------------------------|--------------------------------------------|
| 1  | $^1\text{H}$ NMR       | $^1\text{H}$ nuclear magnetic resonance    |
| 2  | $^{13}\text{C}$ NMR    | $^{13}\text{C}$ nuclear magnetic resonance |
| 3  | $^{19}\text{F}$ NMR    | $^{19}\text{F}$ nuclear magnetic resonance |
| 4  | HRMS                   | High-resolution mass spectroscopy          |
| 5  | <i>Rs</i>              | <i>Rhizoctonia solani</i>                  |
| 6  | <i>Bc</i>              | <i>Botrytis cinerea</i>                    |
| 7  | <i>Pc</i> <sup>1</sup> | <i>Phytophthora capsici</i>                |
| 8  | <i>Ss</i>              | <i>Sclerotinia sclerotiorum</i>            |
| 9  | <i>Fg</i>              | <i>Fusarium graminearum</i>                |
| 10 | <i>Psp</i>             | <i>Phomopsis sp</i>                        |
| 11 | <i>Cc</i>              | <i>Colletotrichum capsici</i>              |
| 12 | <i>Bd</i>              | <i>Botryosphaeria dothidea</i>             |
| 13 | <i>Cg</i>              | <i>Colletotrichum gloeosporioides</i>      |
| 14 | <i>Pc</i> <sup>2</sup> | <i>Plectosphaerella cucumerina</i>         |
| 15 | <i>Fe</i>              | <i>Fusarium equiseti</i>                   |
| 16 | <i>Fd</i>              | <i>Fusarium dimerum</i>                    |
| 17 | DMSO                   | Dimethylsulfoxide                          |
| 18 | DMF                    | <i>N,N</i> -dimethylformamide              |
| 19 | NCS                    | <i>N</i> -Chlorosuccinimide                |
| 20 | TLC                    | Thin Layer Chromatography                  |
| 21 | m.p.                   | Melting point                              |
| 22 | EC <sub>50</sub>       | Median effective concentration             |
| 23 | PDA                    | Potato dextrose agar                       |
| 24 | PDB                    | Potato Dextrose Broth                      |
| 25 | Azo                    | Azoxystrobin                               |
| 26 | Krm                    | Kresoxim-methyl                            |
| 27 | MST                    | Microscale thermophoresis                  |

## 2. Chemical synthesis

### 2.1 General Procedures for Preparing Intermediates 1-4

First, various substituted aldehydes (5 mmol),  $\text{NH}_2\text{OH}\cdot\text{HCl}$  (5 mmol), EtOH (10 mL) and distilled water (10 mL) were added to a 50 mL round bottom flask, mixed well, adjusted the pH to neutral with 5% NaOH solution, stirred for at room temperature 3 h, extracted with DCM, dried the solvent to obtain **intermediate 1**; Secondly, the **intermediate 1** (5 mmol), DMF (10 mL) were mixed evenly, added NCS (5.5 mmol) in batches, reacted for 4h at room temperature, extracted with ethyl acetate, dried the solvent to obtain **intermediate 2**. Then, saturated sodium bicarbonate solution (6 mL) was added to a mixture containing **intermediate 2** (3 mmol), 3-bromopropyne (7.5 mmol) and DCM (20 mL), reacted at room temperature for 24 h, the organic layer was washed with water, and the solvent was dried to obtain **intermediate 3**. Finally, myricitrin (30 mmol), crystalline  $\text{K}_2\text{CO}_3$  (390 mmol), DMF (240 mL) were stirred at room temperature for 5 min,  $\text{CH}_3\text{I}$  (30 mL) was added, and the reaction was continued for 48 h before filtration. After drying the solvent, absolute ethanol (300 mL) was added for reflux for 2 h, followed by concentrated hydrochloric acid (30 mL) for another 3 h. After cooling, filtration is carried out to obtain **intermediate 4**.

### 2.2 General Procedures for Preparing Target Compounds Y1-Y28

**Intermediate 4** (0.9 mmol), **intermediate 3** (1.35 mmol), anhydrous  $\text{K}_2\text{CO}_3$  (1.8 mmol) and DMF (10 mL) were stirred at 60 °C. The reaction was monitored by TLC. After the reaction stopped, the target compounds **Y1-Y28** were obtained by DCM extraction and recrystallization of methanol.

## 3. Biological activities tests

### 3.1 In Vitro Antifungal Assay

Firstly, the tested fungi were cultured in potato glucose agar(PDA) to form new mycelia. The target compounds **Y1-Y28** dissolved with dimethyl sulfoxide(DMSO) were added to the PDA solution and the final mixture was concentrated at 100  $\mu\text{g}/\text{mL}$ . The fungus cake with a diameter of 5 mm was placed in the center of PDA and cultured at 28 °C. DMSO was used as the blank control and azoxystrobin and Kresoxim-methyl were used as positive controls. Repeat three times for each sample. The cross-sectional method was used to measure the diameter of fungal mycelia, and the formula of *in vitro* inhibition rate of fungi was as follows:

$$I (\%) = [(C - T)/(C - 5)] \times 100\%$$

**C** represents the mycelium diameter of the blank control group

**T** represents the mycelium diameter of the drug group,

**I** represents the inhibition rate.

### 3.2 In vivo Antiviral activity

There are 3 modes of anti-TMV activity *in vivo*, namely curative, protective and inactivating activity. 2 mg of each target compound was dissolved in 30  $\mu\text{L}$  DMSO and then 4mL of 1% Tween 80 was added for a final concentration of approximately 500  $\mu\text{g}/\text{mL}$ . The 1% Tween 80 solution

containing DMSO was used as the blank control, and the commercial antiviral agent ningnanmycin was used as the positive control.

#### **Curative activity**

Select the heart leaf tobacco with consistent growth, discard the top and retain 3-5 leaves. Rub the TMV on the leaves sprinkled with emery with a brush, and rinse it after 30min. After being dried, the right half of the leaves were coated with a solution containing medicine with a brush, and the left half of the leaves were coated with a blank control solution. Then they were cultured in a greenhouse at 28 °C. Record the number of the spot after the withered spot is complete.

#### **Protective activity**

Select the heart leaf tobacco with consistent growth, discard the top and retain 3-5 leaves. The right half of the leaf is applied with a brush to the solution containing medicine, and the left half of the leaf is applied with blank control solution. After 12 hours, rub the TMV on the leaves sprinkled with carborundum with a pen, rinse it after 30 minutes, and then cultivate it in a greenhouse at 28 °C. Record the number of dead spots after the spots are completely formed.

#### **Inactivating activity**

Select the heart leaf tobacco with consistent growth, discard the top and retain 3-5 leaves. Mix the medicine and TMV solution with the same volume for inactivation for 30 min, rub the mixture on the right half leaf sprinkled with emery with a brush, and rub the mixture of ningnanmycin and TMV with the same volume on the left half leaf sprinkled with emery. After 30min, wash it clean, and then cultivate it in the greenhouse at 28 °C. Record the number of the spot after the withered spot is complete.

## 4. Spectral data of compounds Y1-Y28

### 4.1 <sup>1</sup>H NMR, <sup>13</sup>C NMR, <sup>19</sup>F NMR and HRMS spectrum of the target compounds

|                                                                                                                                                                                                               | Physical and chemical data                                                                                                                                                                                                                                                                                                                                                                                                                                                                                                                                                                                                                                                                                                                                                                                                                                                                                                                                                  |
|---------------------------------------------------------------------------------------------------------------------------------------------------------------------------------------------------------------|-----------------------------------------------------------------------------------------------------------------------------------------------------------------------------------------------------------------------------------------------------------------------------------------------------------------------------------------------------------------------------------------------------------------------------------------------------------------------------------------------------------------------------------------------------------------------------------------------------------------------------------------------------------------------------------------------------------------------------------------------------------------------------------------------------------------------------------------------------------------------------------------------------------------------------------------------------------------------------|
| 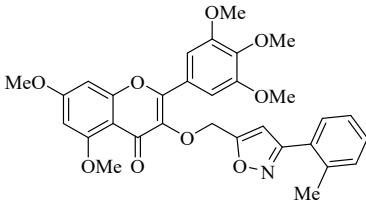 <p>5,7-dimethoxy-3-((3-(o-tolyl)isoxazol-5-yl)methoxy)-2-(3,4,5-trimethoxyphenyl)-4H-chromen-4-one (<b>Y1</b>)</p>          | <p><b><sup>1</sup>H NMR (400 MHz, Chloroform-d)</b> δ 7.37 (dd, <i>J</i> = 7.6, 1.5 Hz, 1H, Ph-H), 7.32 (s, 2H, Ph-H), 7.30 – 7.22 (m, 3H, Ph-H), 6.52 (d, <i>J</i> = 2.2 Hz, 1H, Ph-H), 6.43 (s, 1H, Ph-H, Isoxazole-H), 6.39 (d, <i>J</i> = 2.2 Hz, 1H), 5.35 (s, 2H, -O-CH<sub>2</sub>-), 3.99 (s, 3H, Ph-OCH<sub>3</sub>), 3.92 (d, <i>J</i> = 3.2 Hz, 9H, Ph-OCH<sub>3</sub>), 3.89 (s, 3H, Ph-OCH<sub>3</sub>), 2.37 (s, 3H, Ph-CH<sub>3</sub>).</p> <p><b><sup>13</sup>C NMR (101 MHz, Chloroform-d)</b> δ 173.70, 167.34, 164.25, 162.95, 161.03, 158.83, 153.42, 152.98, 140.17, 139.14, 136.80, 131.04, 129.53, 129.36, 128.46, 125.99, 125.46, 109.24, 106.01, 105.18, 96.08, 92.53, 63.35, 60.96, 56.49, 56.33, 55.90, 20.97.</p> <p><b>HRMS (ESI)</b> calcd for C<sub>31</sub>H<sub>29</sub>NO<sub>9</sub> [M+H]<sup>+</sup>: 560.19151, found 560.19116.</p> <p>White solid, m.p. 111.2-112.7 °C, yield 85%.</p>                                              |
|  <p>5,7-dimethoxy-3-((3-(m-tolyl)isoxazol-5-yl)methoxy)-2-(3,4,5-trimethoxyphenyl)-4H-chromen-4-one (<b>Y2</b>)</p>         | <p><b><sup>1</sup>H NMR (400 MHz, Chloroform-d)</b> δ 7.54 (s, 1H, Ph-H), 7.48 (d, <i>J</i> = 7.6 Hz, 1H, Ph-H), 7.32 (t, <i>J</i> = 7.6 Hz, 1H, Ph-H), 7.26 (s, 2H, Ph-H), 7.24 (d, <i>J</i> = 7.5 Hz, 1H, Ph-H), 6.53 (s, 1H, Isoxazole-H), 6.51 (d, <i>J</i> = 2.2 Hz, 1H, Ph-H), 6.39 (d, <i>J</i> = 2.3 Hz, 1H, Ph-H), 5.32 (s, 2H -O-CH<sub>2</sub>-), 4.00 (s, 3H, Ph-OCH<sub>3</sub>), 3.92 (s, 3H, Ph-OCH<sub>3</sub>), 3.88 (s, 9H, Ph-OCH<sub>3</sub>), 2.40 (s, 3H, Ph-CH<sub>3</sub>).</p> <p><b><sup>13</sup>C NMR (101 MHz, Chloroform-d)</b> δ 173.72, 168.20, 164.26, 162.46, 161.04, 158.87, 153.64, 152.97, 140.12, 139.08, 138.69, 130.83, 128.81, 128.62, 127.34, 125.49, 123.87, 109.27, 106.03, 102.65, 96.09, 92.55, 63.45, 60.94, 56.50, 56.29, 55.90, 21.37.</p> <p><b>HRMS (ESI)</b> calcd for C<sub>31</sub>H<sub>29</sub>NO<sub>9</sub> [M+H]<sup>+</sup>: 560.19151, found 560.19092.</p> <p>White solid, m.p. 101.3-102.9 °C, yield 95%.</p> |
|  <p>5,7-dimethoxy-3-((3-(p-tolyl)isoxazol-5-yl)methoxy)-2-(3,4,5-trimethoxyphenyl)-4H-chromen-4-one (<b>Y3</b>)</p>        | <p><b><sup>1</sup>H NMR (400 MHz, Chloroform-d)</b> δ 7.60 (s, 1H, Ph-H), 7.58 (s, 1H, Ph-H), 7.27 (s, 2H, Ph-H), 7.24 (s, 1H, Ph-H), 7.22 (s, 1H, Ph-H), 6.52 – 6.50 (m, 2H, Ph-H; Isoxazole-H), 6.38 (d, <i>J</i> = 2.2 Hz, 1H Ph-H), 5.32 (s, 2H, -O-CH<sub>2</sub>-), 3.99 (s, 3H, Ph-OCH<sub>3</sub>), 3.91 (s, 3H, Ph-OCH<sub>3</sub>), 3.88 (d, <i>J</i> = 2.6 Hz, 9H, Ph-OCH<sub>3</sub>), 2.39 (s, 3H, Ph-CH<sub>3</sub>).</p> <p><b><sup>13</sup>C NMR (101 MHz, Chloroform-d)</b> δ 173.71, 168.14, 164.24, 162.30, 161.03, 158.85, 153.58, 152.97, 140.21, 140.11, 139.11, 129.60, 126.69, 126.62, 125.91, 125.51, 109.26, 106.02, 102.50, 99.84, 96.08, 92.54, 63.46, 60.96, 56.67, 56.49, 56.30, 55.89, 21.44.</p> <p><b>HRMS (ESI)</b> calcd for C<sub>31</sub>H<sub>29</sub>NO<sub>9</sub> [M+H]<sup>+</sup>: 560.19151, found 560.19110.</p> <p>White solid, m.p. 168.7-170.4 °C, yield 93%.</p>                                                           |
|  <p>3-((3-(2-chlorophenyl)isoxazol-5-yl)methoxy)-5,7-dimethoxy-2-(3,4,5-trimethoxyphenyl)-4H-chromen-4-one (<b>Y4</b>)</p> | <p><b><sup>1</sup>H NMR (400 MHz, Chloroform-d)</b> δ 7.63 (dd, <i>J</i> = 7.4, 2.1 Hz, 1H, Ph-H), 7.45 (dd, <i>J</i> = 7.6, 1.7 Hz, 1H, Ph-H), 7.39 – 7.33 (m, 2H, Ph-H), 7.30 (s, 2H, Ph-H), 6.71 (s, 1H, Isoxazole-H), 6.52 (d, <i>J</i> = 2.2 Hz, 1H, Ph-H), 6.39 (d, <i>J</i> = 2.3 Hz, 1H, Ph-H), 5.37 (s, 2H, -O-CH<sub>2</sub>-), 3.99 (s, 3H, Ph-OMe), 3.92 (s, 3H, Ph-OMe), 3.90 (d, <i>J</i> = 3.3 Hz, 9H, Ph-OMe);</p> <p><b><sup>13</sup>C NMR (101 MHz, Chloroform-d)</b> δ 173.68, 167.47, 164.24, 161.03, 160.93, 158.84, 153.49, 152.95, 140.15, 139.07, 132.83, 130.93, 130.89, 130.38, 128.04, 127.10, 125.42, 109.25, 106.02, 105.85, 96.07, 92.51, 63.34, 60.97, 56.49, 56.32, 55.89;</p> <p><b>HRMS (ESI)</b> calcd for C<sub>30</sub>H<sub>26</sub>ClNO<sub>9</sub> [M+H]<sup>+</sup>: 580.13689, found 580.13654. White solid, m.p. 163.4-165.3 °C, yield 87%.</p>                                                                                  |

|                                                                                                                                                                                                                   |                                                                                                                                                                                                                                                                                                                                                                                                                                                                                                                                                                                                                                                                                                                                                                                                                                                                                                                             |
|-------------------------------------------------------------------------------------------------------------------------------------------------------------------------------------------------------------------|-----------------------------------------------------------------------------------------------------------------------------------------------------------------------------------------------------------------------------------------------------------------------------------------------------------------------------------------------------------------------------------------------------------------------------------------------------------------------------------------------------------------------------------------------------------------------------------------------------------------------------------------------------------------------------------------------------------------------------------------------------------------------------------------------------------------------------------------------------------------------------------------------------------------------------|
| 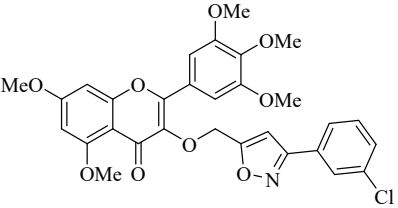 <p>3-((3-(3-chlorophenyl)isoxazol-5-yl)methoxy)-5,7-dimethoxy-2-(3,4,5-trimethoxyphenyl)-4H-chromen-4-one (<b>Y5</b>)</p>       | <p><sup>1</sup>H NMR (400 MHz, Chloroform-d) δ 7.71 (t, <i>J</i> = 1.8 Hz, 1H, Ph-H), 7.59 (dt, <i>J</i> = 7.2, 1.6 Hz, 1H, Ph-H), 7.43 – 7.37 (m, 2H, Ph-H), 7.26 (s, 2H, Ph-H), 6.54 (s, 1H, Isoxazole-H), 6.52 (d, <i>J</i> = 2.3 Hz, 1H, Ph-H), 6.40 (d, <i>J</i> = 2.3 Hz, 1H, Ph-H), 5.32 (s, 2H, -O-CH<sub>2</sub>-), 4.00 (s, 3H, Ph-OCH<sub>3</sub>), 3.92 (s, 3H Ph-OCH<sub>3</sub>), 3.89 (s, 9H Ph-OCH<sub>3</sub>).</p> <p><sup>13</sup>C NMR (101 MHz, Chloroform-d) δ 173.64, 168.78, 164.27, 161.23, 161.03, 158.86, 153.64, 152.96, 140.14, 139.01, 134.92, 130.50, 130.22, 130.07, 126.80, 125.42, 124.85, 109.24, 106.00, 102.46, 96.10, 92.54, 63.36, 60.95, 56.49, 56.28, 55.88.</p> <p>HRMS (ESI) calcd for C<sub>30</sub>H<sub>26</sub>ClNO<sub>9</sub> [M+H]<sup>+</sup>: 580.13689, found 580.13660. White solid, m.p. 196.2-197.4 °C, yield 52%.</p>                                              |
|  <p>3-((3-(4-chlorophenyl)isoxazol-5-yl)methoxy)-5,7-dimethoxy-2-(3,4,5-trimethoxyphenyl)-4H-chromen-4-one (<b>Y6</b>)</p>       | <p><sup>1</sup>H NMR (400 MHz, Chloroform-d) δ 7.67 – 7.63 (m, 2H, Ph-H), 7.43 – 7.40 (m, 2H, Ph-H), 7.26 (s, 2H, Ph-H), 6.54 (s, 1H, Isoxazole-H), 6.52 (d, <i>J</i> = 2.3 Hz, 1H, Ph-H), 6.39 (d, <i>J</i> = 2.2 Hz, 1H, Ph-H), 5.31 (s, 2H, -O-CH<sub>2</sub>-), 4.00 (s, 3H, Ph-OCH<sub>3</sub>), 3.92 (s, 3H, Ph-OCH<sub>3</sub>), 3.89 (d, <i>J</i> = 4.2 Hz, 9H, Ph-H, Ph-OCH<sub>3</sub>).</p> <p><sup>13</sup>C NMR (126 MHz, Chloroform-d) δ 173.75, 168.77, 164.36, 161.47, 161.11, 158.94, 153.70, 153.06, 140.22, 139.15, 136.16, 129.28, 128.08, 127.33, 125.53, 109.32, 106.09, 102.49, 96.19, 92.63, 63.50, 61.05, 56.59, 56.38, 55.98.</p> <p>HRMS (ESI) calcd for C<sub>30</sub>H<sub>26</sub>ClNO<sub>9</sub> [M+H]<sup>+</sup>: 580.13689, found 580.13684. White solid, m.p. 195.7-197.2 °C, yield 80%.</p>                                                                                            |
|  <p>3-((3-(3,4-dichlorophenyl)isoxazol-5-yl)methoxy)-5,7-dimethoxy-2-(3,4,5-trimethoxyphenyl)-4H-chromen-4-one (<b>Y7</b>)</p> | <p><sup>1</sup>H NMR (400 MHz, Chloroform-d) δ 7.82 (d, <i>J</i> = 1.8 Hz, 1H, Ph-H), 7.57 – 7.50 (m, 2H, Ph-H), 7.26 (s, 2H, Ph-H), 6.55 (s, 1H, Isoxazole-H), 6.52 (d, <i>J</i> = 2.2 Hz, 1H, Ph-H), 6.40 (d, <i>J</i> = 2.2 Hz, 1H, Ph-H), 5.31 (s, 2H, -O-CH<sub>2</sub>-), 4.00 (s, 3H, Ph-OCH<sub>3</sub>), 3.92 (s, 3H, Ph-OCH<sub>3</sub>), 3.90 (d, <i>J</i> = 3.1 Hz, 9H, Ph-OCH<sub>3</sub>).</p> <p><sup>13</sup>C NMR (101 MHz, Chloroform-d) δ 173.64, 169.12, 164.31, 161.04, 160.49, 158.87, 153.61, 153.00, 140.19, 139.06, 134.24, 133.31, 131.00, 128.75, 128.57, 125.89, 125.42, 109.24, 106.02, 102.36, 96.13, 92.57, 63.40, 60.98, 56.52, 56.31, 55.91.</p> <p>HRMS (ESI) calcd for C<sub>30</sub>H<sub>25</sub>Cl<sub>2</sub>NO<sub>9</sub> [M+H]<sup>+</sup>: 614.09791, found 614.09772. White solid, m.p. 176.8-178.3 °C, yield 93%.</p>                                                          |
|  <p>3-((3-(2,4-dichlorophenyl)isoxazol-5-yl)methoxy)-5,7-dimethoxy-2-(3,4,5-trimethoxyphenyl)-4H-chromen-4-one (<b>Y8</b>)</p> | <p><sup>1</sup>H NMR (500 MHz, Chloroform-d) δ 7.56 (d, <i>J</i> = 8.4 Hz, 1H, Ph-H), 7.45 (d, <i>J</i> = 2.1 Hz, 1H, Ph-H), 7.30 (dd, <i>J</i> = 8.3, 2.1 Hz, 1H, Ph-H), 7.27 (s, 2H, Ph-H), 6.69 (s, 1H, Isoxazole-H), 6.49 (d, <i>J</i> = 2.3 Hz, 1H, Ph-H), 6.36 (d, <i>J</i> = 2.2 Hz, 1H, Ph-H), 5.32 (s, 2H, -O-CH<sub>2</sub>-), 3.97 (s, 3H, Ph-OCH<sub>3</sub>), 3.90 (s, 3H, Ph-OCH<sub>3</sub>), 3.88 (d, <i>J</i> = 1.7 Hz, 9H, Ph-OCH<sub>3</sub>).</p> <p><sup>13</sup>C NMR (126 MHz, Chloroform-d) δ 173.75, 167.89, 164.34, 161.08, 160.17, 158.90, 153.58, 153.01, 140.16, 139.12, 136.44, 133.60, 131.72, 130.32, 127.64, 126.65, 125.46, 109.27, 106.02, 105.71, 96.16, 92.57, 63.38, 61.07, 56.57, 56.38, 55.99.</p> <p>HRMS (ESI) calcd for C<sub>30</sub>H<sub>25</sub>Cl<sub>2</sub>NO<sub>9</sub> [M+H]<sup>+</sup>: 614.09791, found 614.09729. White solid, m.p. 194.0-195.1 °C, yield 94%.</p> |
|  <p>3-((3-(2-fluorophenyl)isoxazol-5-yl)methoxy)-5,7-dimethoxy-2-(3,4,5-trimethoxyphenyl)-4H-chromen-4-one (<b>Y9</b>)</p>     | <p><sup>1</sup>H NMR (500 MHz, Chloroform-d) δ 7.87 (td, <i>J</i> = 7.6, 1.8 Hz, 1H, Ph-H), 7.42 – 7.37 (m, 1H, Ph-H), 7.24 (s, 2H, Ph-H), 7.20 (td, <i>J</i> = 7.6, 1.1 Hz, 1H, Ph-H), 7.16 – 7.10 (m, 1H, Ph-H), 6.65 (d, <i>J</i> = 3.5 Hz, 1H, Isoxazole-H), 6.50 (d, <i>J</i> = 2.2 Hz, 1H, Ph-H), 6.37 (d, <i>J</i> = 2.2 Hz, 1H, Ph-H), 5.32 (s, 2H, -O-CH<sub>2</sub>-), 3.98 (s, 3H, Ph-OCH<sub>3</sub>), 3.90 (s, 3H, Ph-OCH<sub>3</sub>), 3.86 (s, 6H, Ph-OCH<sub>3</sub>), 3.84 (s, 3H, Ph-OCH<sub>3</sub>).</p>                                                                                                                                                                                                                                                                                                                                                                                                |

|                                                                                                                                                                                                                                  |                                                                                                                                                                                                                                                                                                                                                                                                                                                                                                                                                                                                                                                                                                                                                                                                                                                                                                                                                                                                                                            |
|----------------------------------------------------------------------------------------------------------------------------------------------------------------------------------------------------------------------------------|--------------------------------------------------------------------------------------------------------------------------------------------------------------------------------------------------------------------------------------------------------------------------------------------------------------------------------------------------------------------------------------------------------------------------------------------------------------------------------------------------------------------------------------------------------------------------------------------------------------------------------------------------------------------------------------------------------------------------------------------------------------------------------------------------------------------------------------------------------------------------------------------------------------------------------------------------------------------------------------------------------------------------------------------|
| <p>3-((3-(2-fluorophenyl)isoxazol-5-yl)methoxy)-5,7-dimethoxy-2-(3,4,5-trimethoxyphenyl)-4H-chromen-4-one (<b>Y9</b>)</p>                                                                                                        | <p><sup>13</sup>C NMR (126 MHz, Chloroform-d) δ 173.74, 168.23, 164.30, 161.23, 161.11, 159.23, 158.94, 157.76, 153.69, 153.00, 140.09, 139.16, 131.84, 131.77, 129.09, 129.07, 125.54, 124.69, 124.66, 116.92, 116.83, 116.52, 116.35, 109.34, 106.00, 105.07, 105.00, 96.15, 92.59, 63.47, 60.99, 56.58, 56.33, 55.97.</p> <p><sup>19</sup>F NMR (471 MHz, Chloroform-d) δ -114.15.</p> <p>HRMS (ESI) calcd for C<sub>30</sub>H<sub>26</sub>FNO<sub>9</sub> [M+H]<sup>+</sup>: 564.16644, found 564.16663.</p> <p>White solid, m.p. 178.7-180.3 °C, yield 89%.</p>                                                                                                                                                                                                                                                                                                                                                                                                                                                                       |
| <p>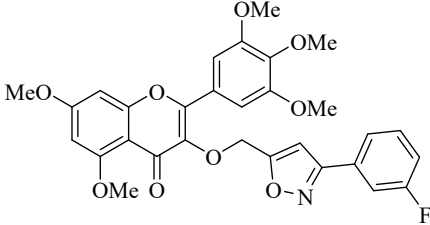</p> <p>3-((3-(3-fluorophenyl)isoxazol-5-yl)methoxy)-5,7-dimethoxy-2-(3,4,5-trimethoxyphenyl)-4H-chromen-4-one (<b>Y10</b>)</p>              | <p><sup>1</sup>H NMR (400 MHz, Chloroform-d) δ 7.48 (dt, <i>J</i> = 7.7, 1.3 Hz, 1H, Ph-H), 7.45 – 7.39 (m, 2H, Ph-H), 7.26 (s, 2H, Ph-H), 7.13 (tdd, <i>J</i> = 8.4, 2.6, 1.1 Hz, 1H, Ph-H), 6.54 (s, 1H, Isoxazole-H), 6.52 (d, <i>J</i> = 2.3 Hz, 1H, Ph-H), 6.39 (d, <i>J</i> = 2.3 Hz, 1H, Ph-H), 5.32 (s, 2H, -O-CH<sub>2</sub>-), 4.00 (s, 3H, Ph-OCH<sub>3</sub>), 3.92 (s, 3H, Ph-OCH<sub>3</sub>), 3.89 (d, <i>J</i> = 0.8 Hz, 9H, Ph-OCH<sub>3</sub>).</p> <p><sup>13</sup>C NMR (101 MHz, Chloroform-d) δ 173.65, 168.79, 164.28, 164.18, 161.73, 161.42, 161.39, 161.04, 158.86, 153.61, 152.99, 140.15, 139.05, 130.89, 130.80, 130.64, 130.56, 125.46, 122.51, 122.48, 117.11, 116.90, 113.82, 113.59, 109.25, 106.01, 102.51, 96.11, 92.55, 63.39, 60.95, 56.51, 56.29, 55.90.</p> <p><sup>19</sup>F NMR (471 MHz, Chloroform-d) δ -111.92.</p> <p>HRMS (ESI) calcd for C<sub>30</sub>H<sub>26</sub>FNO<sub>9</sub> [M+H]<sup>+</sup>: 564.16644, found 564.16632.</p> <p>White solid, m.p. 192.4-194.1 °C, yield 94%.</p> |
| <p></p> <p>3-((3-(4-fluorophenyl)isoxazol-5-yl)methoxy)-5,7-dimethoxy-2-(3,4,5-trimethoxyphenyl)-4H-chromen-4-one (<b>Y11</b>)</p>            | <p><sup>1</sup>H NMR (400 MHz, Chloroform-d) δ 7.72 – 7.68 (m, 2H, Ph-H), 7.27 (s, 2H, Ph-H), 7.13 (t, <i>J</i> = 8.7 Hz, 2H, Ph-H), 6.52 (d, <i>J</i> = 2.7 Hz, 2H, Ph-H), 6.39 (d, <i>J</i> = 2.3 Hz, Isoxazole-H), 5.31 (s, 2H, -O-CH<sub>2</sub>-), 4.00 (s, 3H, Ph-OCH<sub>3</sub>), 3.92 (s, 3H, Ph-OCH<sub>3</sub>), 3.89 (d, <i>J</i> = 3.0 Hz, 9H, Ph-OCH<sub>3</sub>).</p> <p><sup>13</sup>C NMR (101 MHz, Chloroform-d) δ 173.67, 168.57, 165.06, 164.28, 162.57, 161.44, 161.04, 158.86, 153.60, 152.99, 140.14, 139.09, 128.71, 128.63, 125.48, 125.02, 124.99, 116.16, 115.94, 109.25, 106.03, 102.41, 96.11, 92.55, 63.43, 60.96, 56.51, 56.30, 55.90.</p> <p><sup>19</sup>F NMR (376 MHz, Chloroform-d) δ -110.45.</p> <p>HRMS (ESI) calcd for C<sub>30</sub>H<sub>26</sub>FNO<sub>9</sub> [M+H]<sup>+</sup>: 564.16644, found 564.16626.</p> <p>White solid, m.p. 162.9-164.0 °C, yield 92%</p>                                                                                                                           |
| <p></p> <p>5,7-dimethoxy-3-((3-(4-(trifluoromethyl)phenyl)isoxazol-5-yl)methoxy)-2-(3,4,5-trimethoxyphenyl)-4H-chromen-4-one (<b>Y12</b>)</p> | <p><sup>1</sup>H NMR (400 MHz, Chloroform-d) δ 7.84 (d, <i>J</i> = 8.0 Hz, 2H, Ph-H), 7.70 (d, <i>J</i> = 7.9 Hz, 2H, Ph-H), 7.27 (s, 2H, Ph-H), 6.62 (s, 1H, Isoxazole-H), 6.52 (d, <i>J</i> = 2.3 Hz, 1H, Ph-H), 6.40 (d, <i>J</i> = 2.3 Hz, 1H, Ph-H), 5.33 (s, 2H, -O-CH<sub>2</sub>-), 4.00 (s, 3H, Ph-OCH<sub>3</sub>), 3.92 (s, 3H, Ph-OCH<sub>3</sub>), 3.89 (d, <i>J</i> = 4.3 Hz, 9H, Ph-OCH<sub>3</sub>).</p> <p><sup>13</sup>C NMR (101 MHz, Chloroform-d) δ 173.65, 169.08, 164.32, 161.23, 161.03, 158.86, 153.60, 153.00, 140.18, 139.07, 132.23, 132.03, 131.70, 127.10, 127.07, 125.99, 125.95, 125.91, 125.87, 125.43, 125.18, 122.48, 109.22, 106.02, 102.55, 96.13, 92.56, 63.42, 60.96, 56.51, 56.29, 55.90.</p> <p><sup>19</sup>F NMR (376 MHz, Chloroform-d) δ -62.86.</p> <p>HRMS (ESI) calcd for C<sub>31</sub>H<sub>26</sub>F<sub>3</sub>NO<sub>9</sub> [M+H]<sup>+</sup>: 614.16324, found 614.16293. White solid, m.p. 172.3-173.9 °C, yield 94%.</p>                                                          |



|                                                                                                                                                                                                                 |                                                                                                                                                                                                                                                                                                                                                                                                                                                                                                                                                                                                                                                                                                                                                                                                                                                                                                                                                                              |
|-----------------------------------------------------------------------------------------------------------------------------------------------------------------------------------------------------------------|------------------------------------------------------------------------------------------------------------------------------------------------------------------------------------------------------------------------------------------------------------------------------------------------------------------------------------------------------------------------------------------------------------------------------------------------------------------------------------------------------------------------------------------------------------------------------------------------------------------------------------------------------------------------------------------------------------------------------------------------------------------------------------------------------------------------------------------------------------------------------------------------------------------------------------------------------------------------------|
| 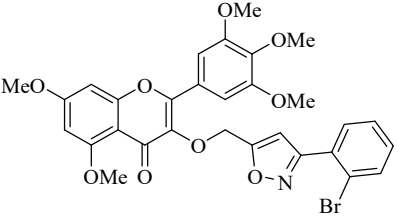 <p>3-((3-(2-bromophenyl)isoxazol-5-yl)methoxy)-5,7-dimethoxy-2-(3,4,5-trimethoxyphenyl)-4H-chromen-4-one (<b>Y13</b>)</p>     | <p><b><sup>1</sup>H NMR (500 MHz, Chloroform-d)</b> δ 7.62 (dd, <i>J</i> = 8.2, 1.3 Hz, 1H, Ph-H), 7.50 (dd, <i>J</i> = 7.6, 1.7 Hz, 1H, Ph-H), 7.35 (td, <i>J</i> = 7.5, 1.2 Hz, 1H, Ph-H), 7.29(s, 2H, Ph-H), 7.25(d, 2H, Ph-H), 6.66 (s, 1H, Isoxazole-H), 6.49 (d, <i>J</i> = 2.3 Hz, 1H, Ph-H), 6.37 (d, <i>J</i> = 2.2 Hz, 1H, Ph-H), 5.36(s, 2H, -O-CH<sub>2</sub>-), 3.97(s, 3H, Ph-OCH<sub>3</sub>), 3.90(s, 3H, Ph-OCH<sub>3</sub>), 3.89(s, 6H, Ph-OCH<sub>3</sub>), 3.88(s, 3H, Ph-OCH<sub>3</sub>).</p> <p><b><sup>13</sup>C NMR (126 MHz, Chloroform-d)</b> δ 173.76, 167.31, 164.31, 162.38, 161.11, 158.91, 153.56, 153.02, 140.21, 139.07, 133.64, 131.34, 131.12, 130.25, 127.69, 125.50, 122.25, 109.33, 106.09, 96.14, 92.56, 63.31, 61.07, 56.57, 56.42, 55.97.</p> <p><b>HRMS</b> (ESI) calcd for C<sub>30</sub>H<sub>26</sub>BrNO<sub>9</sub> [M+H]<sup>+</sup>: 624.08637, found 624.08691. White solid, m.p. 164.5-166.1 °C, yield 93%.</p>         |
|  <p>3-((3-(3-bromophenyl)isoxazol-5-yl)methoxy)-5,7-dimethoxy-2-(3,4,5-trimethoxyphenyl)-4H-chromen-4-one (<b>Y14</b>)</p>     | <p><b><sup>1</sup>H NMR (400 MHz, Chloroform-d)</b> δ 7.87 (t, <i>J</i> = 1.8 Hz, 1H, Ph-H), 7.65 – 7.61 (m, 1H, Ph-H), 7.56 (ddd, <i>J</i> = 8.0, 2.0, 1.1 Hz, 1H, Ph-H), 7.31 (t, <i>J</i> = 7.9 Hz, 1H, Ph-H), 7.25 (s, 2H, Ph-H), 6.54 (s, 1H, Isoxazole-H), 6.52 (d, <i>J</i> = 2.3 Hz, 1H, Ph-H), 6.39 (d, <i>J</i> = 2.2 Hz, 1H, Ph-H), 5.31 (s, 2H, -O-CH<sub>2</sub>-), 4.00 (s, 3H, Ph-OCH<sub>3</sub>), 3.92 (s, 3H, Ph-OCH<sub>3</sub>), 3.89 (s, 9H, Ph-OCH<sub>3</sub>).</p> <p><b><sup>13</sup>C NMR (101 MHz, Chloroform-d)</b> δ 173.66, 168.79, 164.29, 161.13, 161.03, 158.87, 153.68, 152.98, 140.15, 139.02, 133.02, 130.75, 130.49, 129.69, 125.43, 125.32, 123.00, 109.25, 106.01, 102.48, 96.12, 92.57, 63.38, 60.98, 56.51, 56.31, 55.90.</p> <p><b>HRMS</b> (ESI) calcd for C<sub>30</sub>H<sub>26</sub>BrNO<sub>9</sub> [M+H]<sup>+</sup>: 624.08637, found 624.08618. White solid, m.p. 188.6-190.0 °C, yield 91%.</p>                           |
|  <p>3-((3-(4-bromophenyl)isoxazol-5-yl)methoxy)-5,7-dimethoxy-2-(3,4,5-trimethoxyphenyl)-4H-chromen-4-one (<b>Y15</b>)</p>   | <p><b><sup>1</sup>H NMR (500 MHz, Chloroform-d)</b> δ 7.45 (dt, <i>J</i> = 7.6, 1.3 Hz, 1H, Ph-H), 7.42 – 7.37 (m, 2H, Ph-H), 7.23 (s, 2H, Ph-H), 7.13 – 7.09 (m, 1H, Ph-H), 6.51(s, 1H, Isoxazole-H), 6.49 (d, <i>J</i> = 2.1 Hz, 1H, Ph-H), 6.37 (d, <i>J</i> = 2.2 Hz, 1H, Ph-H), 5.29 (s, 2H, -O-CH<sub>2</sub>-), 3.98(s, 3H, Ph-OCH<sub>3</sub>), 3.90(s, 3H, Ph-OCH<sub>3</sub>), 3.86(s, 9H, Ph-OCH<sub>3</sub>).</p> <p><b><sup>13</sup>C NMR (126 MHz, Chloroform-d)</b> δ 173.74, 168.83, 164.35, 164.00, 162.03, 161.47, 161.09, 158.94, 153.72, 153.04, 140.15, 139.10, 130.92, 130.85, 130.72, 130.65, 125.53, 122.58, 122.55, 117.18, 117.01, 113.86, 113.68, 109.31, 106.02, 102.61, 96.19, 92.61, 63.45, 61.03, 56.59, 56.35, 55.98.</p> <p><b>HRMS</b> (ESI) calcd for C<sub>30</sub>H<sub>26</sub>BrNO<sub>9</sub> [M+H]<sup>+</sup>: 624.08637, found 624.08600. White solid, m.p. 184.0-185.5 °C, yield 95%.</p>                                        |
|  <p>5,7-dimethoxy-3-((3-(2-methoxyphenyl)isoxazol-5-yl)methoxy)-2-(3,4,5-trimethoxyphenyl)-4H-chromen-4-one (<b>Y16</b>)</p> | <p><b><sup>1</sup>H NMR (400 MHz, Chloroform-d)</b> δ 7.79 (dd, <i>J</i> = 7.7, 1.8 Hz, 1H, Ph-H), 7.40 (ddd, <i>J</i> = 8.4, 7.4, 1.8 Hz, 1H, Ph-H), 7.30 (s, 2H, Ph-H), 7.03 – 6.96 (m, 2H, Ph-H), 6.78 (s, 1H, Isoxazole-H), 6.51 (d, <i>J</i> = 2.2 Hz, 1H, Ph-H), 6.38 (d, <i>J</i> = 2.2 Hz, 1H, Ph-H), 5.35 (s, 2H, -O-CH<sub>2</sub>-), 4.00 (s, 3H, Ph-OCH<sub>3</sub>), 3.92 (s, 3H, Ph-OCH<sub>3</sub>), 3.89 (d, <i>J</i> = 1.3 Hz, 9H, Ph-OCH<sub>3</sub>), 3.85 (s, 3H, Ph-OCH<sub>3</sub>).</p> <p><b><sup>13</sup>C NMR (101 MHz, Chloroform-d)</b> δ 173.76, 166.83, 164.18, 161.04, 159.97, 158.83, 157.15, 153.40, 152.94, 140.09, 139.16, 131.26, 129.36, 125.51, 120.86, 117.68, 111.33, 109.29, 106.23, 105.99, 96.03, 92.50, 63.37, 60.95, 56.49, 56.30, 55.89, 55.46.</p> <p><b>HRMS</b> (ESI) calcd for C<sub>31</sub>H<sub>29</sub>NO<sub>10</sub> [M+H]<sup>+</sup>: 576.18642, found 576.18628. White solid, m.p. 177.6-178.0 °C, yield 81%.</p> |

|                                                                                                                                                                                                               |                                                                                                                                                                                                                                                                                                                                                                                                                                                                                                                                                                                                                                                                                                                                                                                                                                                                                                                                                                                                                                                                          |
|---------------------------------------------------------------------------------------------------------------------------------------------------------------------------------------------------------------|--------------------------------------------------------------------------------------------------------------------------------------------------------------------------------------------------------------------------------------------------------------------------------------------------------------------------------------------------------------------------------------------------------------------------------------------------------------------------------------------------------------------------------------------------------------------------------------------------------------------------------------------------------------------------------------------------------------------------------------------------------------------------------------------------------------------------------------------------------------------------------------------------------------------------------------------------------------------------------------------------------------------------------------------------------------------------|
| 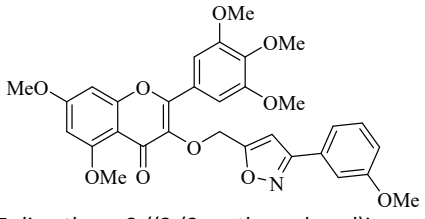 <p>5,7-dimethoxy-3-((3-(3-methoxyphenyl)isoxazol-5-yl)methoxy)-2-(3,4,5-trimethoxyphenyl)-4H-chromen-4-one (<b>Y17</b>)</p> | <p><b><sup>1</sup>H NMR (500 MHz, Chloroform-d)</b> δ 7.32 (td, <i>J</i> = 8.0, 1.2 Hz, 1H, Ph-H), 7.26 (dt, <i>J</i> = 2.6, 1.3 Hz, 1H, Ph-H), 7.24 (d, <i>J</i> = 1.1 Hz, 2H, Ph-H), 6.95 (ddd, <i>J</i> = 8.3, 2.7, 1.3 Hz, 1H, Ph-H), 6.52(s, 1H, Isoxazole-H), 6.49 (t, <i>J</i> = 2.0 Hz, 1H, Ph-H), 6.37 (t, <i>J</i> = 2.2 Hz, 1H, Ph-H), 5.30(s, 2H, -O-CH<sub>2</sub>-), 3.98 (d, <i>J</i> = 2.0 Hz, 3H, Ph-OCH<sub>3</sub>), 3.90 (d, <i>J</i> = 1.5 Hz, 3H, Ph-OCH<sub>3</sub>), 3.86 (t, <i>J</i> = 1.7 Hz, 6H, Ph-OCH<sub>3</sub>), 3.83 (d, <i>J</i> = 1.3 Hz, 3H, Ph-OCH<sub>3</sub>).</p> <p><b><sup>13</sup>C NMR (126 MHz, Chloroform-d)</b> δ 173.75, 168.40, 164.31, 162.34, 161.11, 160.00, 158.94, 153.68, 153.04, 140.17, 139.12, 130.08, 130.04, 125.56, 119.31, 116.34, 111.56, 109.35, 106.06, 102.79, 96.17, 92.61, 63.46, 61.02, 56.59, 56.36, 55.97, 55.48.</p> <p><b>HRMS (ESI)</b> calcd for C<sub>31</sub>H<sub>29</sub>NO<sub>10</sub> [M+H]<sup>+</sup>: 576.18642, found 576.18640. White solid, m.p. 149.5-151.2 °C, yield 80%.</p> |
|  <p>5,7-dimethoxy-3-((3-(4-methoxyphenyl)isoxazol-5-yl)methoxy)-2-(3,4,5-trimethoxyphenyl)-4H-chromen-4-one (<b>Y18</b>)</p> | <p><b><sup>1</sup>H NMR (500 MHz, Chloroform-d)</b> δ 7.32 (t, <i>J</i> = 7.9 Hz, 1H, Ph-H), 7.26 (t, <i>J</i> = 2.0 Hz, 1H, Ph-H), 7.24(s, 2H, Ph-H), 7.23 – 7.21 (m, 1H, Ph-H), 6.95 (dd, <i>J</i> = 8.0, 2.6 Hz, 1H, Ph-H), 6.52(s, 1H, Isoxazole-H), 6.49 (d, <i>J</i> = 2.3 Hz, 1H, Ph-H), 6.37 (d, <i>J</i> = 2.2 Hz, 1H, Ph-H), 5.30(s, 2H, -O-CH<sub>2</sub>-), 3.98(s, 3H, Ph-OCH<sub>3</sub>), 3.90(s, 3H, Ph-OCH<sub>3</sub>), 3.86 (d, <i>J</i> = 2.3 Hz, 6H, Ph-OCH<sub>3</sub>), 3.83(s, 3H, Ph-OCH<sub>3</sub>).</p> <p><b><sup>13</sup>C NMR (126 MHz, Chloroform-d)</b> δ 173.77, 168.39, 164.31, 162.34, 161.09, 159.98, 158.93, 153.71, 153.03, 140.12, 139.11, 130.05, 125.55, 119.31, 116.34, 111.54, 109.33, 106.02, 102.81, 96.17, 92.60, 63.45, 61.03, 56.59, 56.35, 55.98, 55.48.</p> <p><b>HRMS (ESI)</b> calcd for C<sub>31</sub>H<sub>29</sub>NO<sub>10</sub> [M+H]<sup>+</sup>: 576.18642, found 576.18652. White solid, m.p. 189.7-191.4 °C, yield 80%.</p>                                                                                |
|  <p>5,7-dimethoxy-3-((3-phenylisoxazol-5-yl)methoxy)-2-(3,4,5-trimethoxyphenyl)-4H-chromen-4-one (<b>Y19</b>)</p>          | <p><b><sup>1</sup>H NMR (400 MHz, Chloroform-d)</b> δ 7.72 – 7.69 (m, 2H, Ph-H), 7.44 – 7.42 (m, 3H, Ph-H), 7.26 (s, 2H, Ph-H), 6.54 (s, 1H, Isoxazole-H), 6.51 (d, <i>J</i> = 2.3 Hz, 1H, Ph-H), 6.39 (d, <i>J</i> = 2.2 Hz, 1H, Ph-H), 5.32 (s, 2H, -O-CH<sub>2</sub>-), 4.00 (s, 3H, Ph-OCH<sub>3</sub>), 3.92 (s, 3H, Ph-OCH<sub>3</sub>), 3.88 (d, <i>J</i> = 1.1 Hz, 9H, Ph-OCH<sub>3</sub>).</p> <p><b><sup>13</sup>C NMR (101 MHz, Chloroform-d)</b> δ 173.70, 168.33, 164.26, 162.34, 161.03, 158.86, 153.65, 152.97, 140.12, 139.07, 130.08, 130.04, 128.93, 128.75, 126.80, 126.73, 125.50, 109.26, 106.03, 102.57, 96.10, 92.55, 63.43, 60.95, 56.50, 56.30, 55.90.</p> <p><b>HRMS (ESI)</b> calcd for C<sub>30</sub>H<sub>27</sub>NO<sub>9</sub> [M+H]<sup>+</sup>: 546.17586, found 546.17603. White solid, m.p. 155.9-157.7 °C, yield 77%.</p>                                                                                                                                                                                                            |
|  <p>3-((3-cyclopropylisoxazol-5-yl)methoxy)-5,7-dimethoxy-2-(3,4,5-trimethoxyphenyl)-4H-chromen-4-one (<b>Y20</b>)</p>     | <p><b><sup>1</sup>H NMR (400 MHz, Chloroform-d)</b> δ 7.28 (s, 2H, Ph-H), 6.51 (d, <i>J</i> = 2.3 Hz, 1H, Ph-H), 6.38 (d, <i>J</i> = 2.3 Hz, 1H, Ph-H), 5.91 (s, 1H, Isoxazole-H), 5.20 (s, 2H, -O-CH<sub>2</sub>-), 3.98 (s, 3H, Ph-OCH<sub>3</sub>), 3.93 (s, 3H, Ph-OCH<sub>3</sub>), 3.92 (s, 9H, Ph-OCH<sub>3</sub>), 1.98 – 1.87 (m, 1H, -CHCH<sub>2</sub>CH<sub>2</sub>-), 1.04 – 0.93 (m, 2H, -CHCH<sub>2</sub>CH<sub>2</sub>-), 0.70 (dd, <i>J</i> = 4.8, 2.0 Hz, 2H, -CHCH<sub>2</sub>CH<sub>2</sub>-).</p> <p><b><sup>13</sup>C NMR (101 MHz, Chloroform-d)</b> δ 173.65, 167.46, 166.45, 164.22, 161.01, 158.81, 153.28, 152.96, 140.12, 139.26, 125.49, 109.24, 105.97, 101.61, 96.04, 92.51, 63.49, 60.99, 56.47, 56.33, 55.88, 8.01, 7.26.</p> <p><b>HRMS (ESI)</b> calcd for C<sub>27</sub>H<sub>27</sub>NO<sub>9</sub> [M+H]<sup>+</sup>: 510.17586, found 510.17645. White solid, m.p. 94.5-96.2 °C, yield 73%.</p>                                                                                                                                    |

|                                                                                                                                                                                                                                  |                                                                                                                                                                                                                                                                                                                                                                                                                                                                                                                                                                                                                                                                                                                                                                                                                                                                                                                                                                                                                                                                                                         |
|----------------------------------------------------------------------------------------------------------------------------------------------------------------------------------------------------------------------------------|---------------------------------------------------------------------------------------------------------------------------------------------------------------------------------------------------------------------------------------------------------------------------------------------------------------------------------------------------------------------------------------------------------------------------------------------------------------------------------------------------------------------------------------------------------------------------------------------------------------------------------------------------------------------------------------------------------------------------------------------------------------------------------------------------------------------------------------------------------------------------------------------------------------------------------------------------------------------------------------------------------------------------------------------------------------------------------------------------------|
| 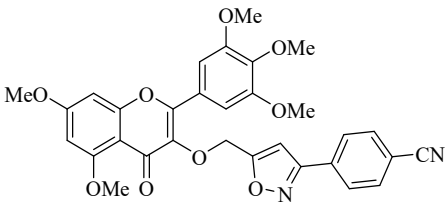 <p>4-(5-(((5,7-dimethoxy-4-oxo-2-(3,4,5-trimethoxyphenyl)-4H-chromen-3-yl)oxy)methyl)isoxazol-3-yl)benzonitrile (<b>Y21</b>)</p>               | <p><b><sup>1</sup>H NMR (500 MHz, Chloroform-d)</b> δ 7.81 (d, <i>J</i> = 8.5 Hz, 2H, Ph-H), 7.72 (d, <i>J</i> = 8.5 Hz, 2H, Ph-H), 7.24(s, 2H, Ph-H), 6.60 (s, 1H, Isoxazole-H), 6.50 (d, <i>J</i> = 2.2 Hz, 1H, Ph-H), 6.37 (d, <i>J</i> = 2.3 Hz, 1H, Ph-H), 5.29 (s, 2H, -O-CH<sub>2</sub>-), 3.98 (s, 3H, Ph-OCH<sub>3</sub>), 3.90 (s, 3H, Ph-OCH<sub>3</sub>), 3.87 (s, 3H, Ph-OCH<sub>3</sub>), 3.86 (s, 6H, Ph-OCH<sub>3</sub>).</p> <p><b><sup>13</sup>C NMR (126 MHz, Chloroform-d)</b> δ 173.70, 169.49, 164.40, 161.09, 160.96, 158.94, 153.67, 153.07, 140.20, 139.14, 133.16, 132.84, 128.19, 127.39, 125.50, 118.43, 113.68, 109.28, 106.04, 102.56, 96.22, 92.63, 63.48, 61.06, 56.61, 56.37, 56.00.</p> <p><b>HRMS (ESI)</b> calcd for C<sub>31</sub>H<sub>26</sub>N<sub>2</sub>O<sub>9</sub> [M+H]<sup>+</sup>: 571.17111, found 571.16992. White solid, m.p. 220.0-221.7 °C, yield 88%.</p>                                                                                                                                                                                         |
|  <p>5,7-dimethoxy-3-((3-(thiophen-2-yl)isoxazol-5-yl)methoxy)-2-(3,4,5-trimethoxyphenyl)-4H-chromen-4-one (<b>Y22</b>)</p>                      | <p><b><sup>1</sup>H NMR (400 MHz, Chloroform-d)</b> δ 7.40 (dd, <i>J</i> = 5.0, 1.2 Hz, 1H, Thiophene-H), 7.36 (dd, <i>J</i> = 3.7, 1.2 Hz, 1H, Thiophene-H), 7.25 (s, 2H, Ph-H), 7.09 (dd, <i>J</i> = 5.1, 3.7 Hz, 1H Thiophene-H), 6.52 (d, <i>J</i> = 2.2 Hz, 1H, Ph-H), 6.48 (s, 1H, Isoxazole-H), 6.39 (d, <i>J</i> = 2.3 Hz, 1H, Ph-H), 5.30 (s, 2H, -O-CH<sub>2</sub>-), 4.00 (s, 3H, Ph-OCH<sub>3</sub>), 3.92 (s, 3H, Ph-OCH<sub>3</sub>), 3.89 (d, <i>J</i> = 3.2 Hz, 9H, Ph-OCH<sub>3</sub>).</p> <p><b><sup>13</sup>C NMR (101 MHz, Chloroform-d)</b> δ 173.65, 168.36, 164.26, 161.04, 158.87, 157.55, 153.66, 152.99, 140.14, 139.02, 130.48, 127.68, 127.65, 127.51, 126.85, 125.45, 109.27, 106.02, 102.57, 101.99, 96.11, 92.56, 63.30, 60.97, 56.51, 56.31, 55.90.</p> <p><b>HRMS (ESI)</b> calcd for C<sub>28</sub>H<sub>25</sub>NO<sub>9</sub>S [M+H]<sup>+</sup>: 552.13228, found 552.13214. White solid, m.p. 194.4-195.9 °C, yield 78%.</p>                                                                                                                                     |
|  <p>3-((3-cyclohexylisoxazol-5-yl)methoxy)-5,7-dimethoxy-2-(3,4,5-trimethoxyphenyl)-4H-chromen-4-one (<b>Y23</b>)</p>                         | <p><b><sup>1</sup>H NMR (400 MHz, Chloroform-d)</b> δ 7.31 (s, 2H, Ph-H), 6.52 (d, <i>J</i> = 2.3 Hz, 1H, Ph-H), 6.38 (d, <i>J</i> = 2.2 Hz, 1H Ph-H), 6.13 (s, 1H, Isoxazole-H), 5.23 (s, 2H, -O-CH<sub>2</sub>-), 3.99 (s, 3H, Ph-OCH<sub>3</sub>), 3.92 (d, <i>J</i> = 1.2 Hz, 6H, Ph-OCH<sub>3</sub>), 3.91 (s, 6H, Ph-OCH<sub>3</sub>), 2.66 (qt, <i>J</i> = 7.4, 3.0 Hz, 1H, -CHCH<sub>2</sub>CH<sub>2</sub>CH<sub>2</sub>CH<sub>2</sub>CH<sub>2</sub>-), 1.90 – 1.68 (m, 6H, -CHCH<sub>2</sub>CH<sub>2</sub>CH<sub>2</sub>CH<sub>2</sub>CH<sub>2</sub>-), 1.35 – 1.23 (m, 4H, -CHCH<sub>2</sub>CH<sub>2</sub>CH<sub>2</sub>CH<sub>2</sub>CH<sub>2</sub>-).</p> <p><b><sup>13</sup>C NMR (101 MHz, Chloroform-d)</b> δ 173.67, 168.38, 167.19, 164.21, 161.04, 158.81, 153.18, 152.96, 140.12, 139.34, 125.50, 109.27, 105.95, 102.62, 96.03, 92.51, 63.60, 60.97, 56.49, 56.32, 55.88, 35.76, 31.99, 25.91, 25.82.</p> <p><b>HRMS (ESI)</b> calcd for C<sub>30</sub>H<sub>33</sub>NO<sub>9</sub> [M+H]<sup>+</sup>: 552.22281, found 552.22302. White solid, m.p. 89.6-91.4 °C, yield 85%.</p>   |
|  <p>ethyl 2-(4-(5-(((5,7-dimethoxy-4-oxo-2-(3,4,5-trimethoxyphenyl)-4H-chromen-3-yl)oxy)methyl)isoxazol-3-yl)phenoxy)acetate (<b>Y24</b>)</p> | <p><b><sup>1</sup>H NMR (500 MHz, Chloroform-d)</b> δ 7.64 – 7.61 (m, 2H, Ph-H), 7.24(s, 2H, Ph-H), 6.94 – 6.92 (m, 2H, Ph-H), 6.49 (d, <i>J</i> = 2.3 Hz, 1H, Ph-H), 6.46(s, 1H, Isoxazole-H), 6.36 (d, <i>J</i> = 2.2 Hz, 1H, Ph-H), 5.28(s, 2H, -O-CH<sub>2</sub>-), 4.64(s, 2H, -OCH<sub>2</sub>COOCH<sub>2</sub>CH<sub>3</sub>), 4.26 (q, <i>J</i> = 7.2 Hz, 2H -OCH<sub>2</sub>COOCH<sub>2</sub>CH<sub>3</sub>), 3.97(s, 3H, Ph-OCH<sub>3</sub>), 3.89(s, 3H, Ph-OCH<sub>3</sub>), 3.86 (d, <i>J</i> = 4.4 Hz, 9H, Ph-OCH<sub>3</sub>), 1.29 (t, <i>J</i> = 7.2 Hz, 3H, -OCH<sub>2</sub>COOCH<sub>2</sub>CH<sub>3</sub>).</p> <p><b><sup>13</sup>C NMR (126 MHz, Chloroform-d)</b> δ 173.77, 168.67, 168.24, 164.30, 161.82, 161.08, 159.20, 158.92, 153.65, 153.03, 140.11, 139.13, 128.30, 125.57, 122.42, 115.04, 109.32, 106.02, 102.45, 96.16, 92.59, 65.35, 63.47, 61.65, 61.04, 56.58, 56.36, 55.97, 14.27.</p> <p><b>HRMS (ESI)</b> calcd for C<sub>34</sub>H<sub>33</sub>NO<sub>12</sub> [M+H]<sup>+</sup>: 648.20755, found 648.20721. White solid, m.p. 181.2-182.7 °C, yield 93%.</p> |

|                                                                                                                                                                                                                                  |                                                                                                                                                                                                                                                                                                                                                                                                                                                                                                                                                                                                                                                                                                                                                                                                                                                                                                                                                                                                                                                                                                                                                                                                                                                                                                                                                                                                                                                                                        |
|----------------------------------------------------------------------------------------------------------------------------------------------------------------------------------------------------------------------------------|----------------------------------------------------------------------------------------------------------------------------------------------------------------------------------------------------------------------------------------------------------------------------------------------------------------------------------------------------------------------------------------------------------------------------------------------------------------------------------------------------------------------------------------------------------------------------------------------------------------------------------------------------------------------------------------------------------------------------------------------------------------------------------------------------------------------------------------------------------------------------------------------------------------------------------------------------------------------------------------------------------------------------------------------------------------------------------------------------------------------------------------------------------------------------------------------------------------------------------------------------------------------------------------------------------------------------------------------------------------------------------------------------------------------------------------------------------------------------------------|
| 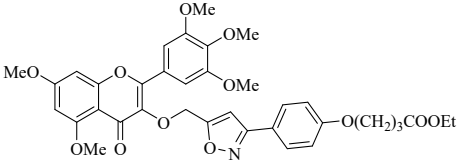 <p>ethyl 4-(4-(5-(((5,7-dimethoxy-4-oxo-2-(3,4,5-trimethoxyphenyl)-4H-chromen-3-yl)oxy)methyl)isoxazol-3-yl)phenoxy)butanoate (<b>Y25</b>)</p> | <p><b><sup>1</sup>H NMR (500 MHz, Chloroform-d)</b> δ 7.62 – 7.59 (m, 2H, Ph-H), 7.24(s, 2H, Ph-H), 6.92 – 6.89 (m, 2H, Ph-H), 6.49 (d, <i>J</i> = 2.2 Hz, 1H, Ph-H), 6.47 (s, 1H, Isoxazole-H), 6.37 (d, <i>J</i> = 2.2 Hz, 1H, Ph-H), 5.28 (d, <i>J</i> = 2.4 Hz, 2H, -O-CH<sub>2</sub>-), 4.13 (q, <i>J</i> = 7.1 Hz, 2H, -OCH<sub>2</sub>CH<sub>2</sub>CH<sub>2</sub>COOCH<sub>2</sub>CH<sub>3</sub>), 4.02 (t, <i>J</i> = 6.2 Hz, 2H, -OCH<sub>2</sub>CH<sub>2</sub>CH<sub>2</sub>COOCH<sub>2</sub>CH<sub>3</sub>), 3.97(s, 3H, Ph-OCH<sub>3</sub>), 3.90(s, 3H, Ph-OCH<sub>3</sub>), 3.86 (d, <i>J</i> = 3.0 Hz, 9H, Ph-OCH<sub>3</sub>), 2.51 (t, <i>J</i> = 7.2 Hz, 2H, -OCH<sub>2</sub>CH<sub>2</sub>CH<sub>2</sub>COOCH<sub>2</sub>CH<sub>3</sub>), 2.12 (q, <i>J</i> = 6.2 Hz, 2H, -OCH<sub>2</sub>CH<sub>2</sub>CH<sub>2</sub>COOCH<sub>2</sub>CH<sub>3</sub>), 1.24 (t, <i>J</i> = 7.2 Hz, 2H, -OCH<sub>2</sub>CH<sub>2</sub>CH<sub>2</sub>COOCH<sub>2</sub>CH<sub>3</sub>).</p> <p><b><sup>13</sup>C NMR (126 MHz, Chloroform-d)</b> δ 173.78, 173.28, 168.12, 164.29, 162.00, 161.09, 160.34, 158.92, 153.62, 153.03, 140.11, 139.18, 128.20, 125.59, 121.36, 114.85, 109.33, 106.02, 102.42, 96.15, 92.59, 66.88, 63.51, 61.05, 60.62, 56.59, 56.37, 55.98, 53.57, 30.81, 24.61, 14.34.</p> <p><b>HRMS (ESI)</b> calcd for C<sub>36</sub>H<sub>37</sub>NO<sub>12</sub> [M+H]<sup>+</sup>: 676.23885, found 676.23840. White solid, m.p. 158.3-160.2 °C, yield 95%.</p> |
|  <p>3-((3-(4-ethylphenyl)isoxazol-5-yl)methoxy)-5,7-dimethoxy-2-(3,4,5-trimethoxyphenyl)-4H-chromen-4-one (<b>Y26</b>)</p>                     | <p><b><sup>1</sup>H NMR (500 MHz, Chloroform-d)</b> δ 7.62 – 7.59 (m, 2H, Ph-H), 7.25 (s, 4H, Ph-H), 6.50 (s, Isoxazole-H;), 6.49 (d, <i>J</i> = 2.3 Hz, 1H, Ph-H), 6.37 (d, <i>J</i> = 2.3 Hz, 1H, Ph-H), 5.30(s, 2H, -O-CH<sub>2</sub>-), 3.98(s, 3H, Ph-OCH<sub>3</sub>), 3.90(s, 3H, Ph-OCH<sub>3</sub>), 3.86(s, 9H, Ph-OCH<sub>3</sub>), 2.69 – 2.64 (m, 2H, Ph-CH<sub>2</sub>CH<sub>3</sub>), 1.23 (t, <i>J</i> = 7.6 Hz, 3H, Ph-CH<sub>2</sub>CH<sub>3</sub>).</p> <p><b><sup>13</sup>C NMR (126 MHz, Chloroform-d)</b> δ 173.76, 168.20, 164.30, 162.37, 161.11, 158.92, 153.63, 153.04, 146.58, 140.20, 139.16, 128.49, 126.79, 126.22, 125.57, 109.35, 106.12, 102.58, 96.15, 92.61, 63.51, 61.01, 56.56, 56.37, 55.95, 28.85, 15.52.</p> <p><b>HRMS (ESI)</b> calcd for C<sub>32</sub>H<sub>31</sub>NO<sub>9</sub> [M+H]<sup>+</sup>: 574.20716, found 574.20532. White solid, m.p. 156.3-157.7 °C, yield 91%.</p>                                                                                                                                                                                                                                                                                                                                                                                                                                                                                                                                                         |
|  <p>3-((3-(4-isopropylphenyl)isoxazol-5-yl)methoxy)-5,7-dimethoxy-2-(3,4,5-trimethoxyphenyl)-4H-chromen-4-one (<b>Y27</b>)</p>                | <p><b><sup>1</sup>H NMR (400 MHz, Chloroform-d)</b> δ 7.65 – 7.61 (m, 2H, Ph-H), 7.31 – 7.28 (m, 2H, Ph-H), 7.26 (s, 2H, Ph-H), 6.54 – 6.50 (m, 2H, Ph-H; Isoxazole-H), 6.39 (d, <i>J</i> = 2.3 Hz, 1H, Ph-H), 5.32 (s, 2H, -O-CH<sub>2</sub>-), 4.00 (s, 3H, Ph-OCH<sub>3</sub>), 3.92 (s, 3H, Ph-OCH<sub>3</sub>), 3.87 (s, 9H, Ph-OCH<sub>3</sub>), 2.94 (p, <i>J</i> = 6.8 Hz, 1H, -CH(CH<sub>3</sub>)<sub>2</sub>), 1.27 (d, <i>J</i> = 6.9 Hz, 6H, -CH(CH<sub>3</sub>)<sub>2</sub>).</p> <p><b><sup>13</sup>C NMR (126 MHz, Chloroform-d)</b> δ 173.76, 168.16, 164.31, 162.34, 161.09, 158.91, 153.66, 153.03, 151.19, 140.19, 139.14, 127.07, 126.81, 126.34, 125.56, 109.32, 106.11, 102.59, 96.15, 92.62, 63.50, 60.99, 56.54, 56.36, 55.95, 34.13, 23.91.</p> <p><b>HRMS (ESI)</b> calcd for C<sub>33</sub>H<sub>33</sub>NO<sub>9</sub> [M+H]<sup>+</sup>: 588.22281, found 588.22083. White solid, m.p. 161.1-162.4 °C, yield 87%.</p>                                                                                                                                                                                                                                                                                                                                                                                                                                                                                                                                     |
|  <p>3-((3-(4-(tert-butyl)phenyl)isoxazol-5-yl)methoxy)-5,7-dimethoxy-2-(3,4,5-trimethoxyphenyl)-4H-chromen-4-one (<b>Y28</b>)</p>             | <p><b><sup>1</sup>H NMR (400 MHz, Chloroform-d)</b> δ 7.66 – 7.62 (m, 2H, Ph-H), 7.47 – 7.44 (m, 2H, Ph-H), 7.26 (s, 2H, Ph-H), 6.53 (s, 1H, Isoxazole-H), 6.51 (d, <i>J</i> = 2.3 Hz, 1H, Ph-H), 6.39 (d, <i>J</i> = 2.3 Hz, 1H, Ph-H), 5.32 (s, 2H, -O-CH<sub>2</sub>-), 4.00 (s, 3H, Ph-OCH<sub>3</sub>), 3.92 (s, 3H, Ph-OCH<sub>3</sub>), 3.88 (s, 9H, Ph-OCH<sub>3</sub>), 1.34 (s, 9H, Ph-t-Bu).</p> <p><b><sup>13</sup>C NMR (126 MHz, Chloroform-d)</b> δ 173.75, 168.17, 164.29, 162.27, 161.11, 158.92, 153.62, 153.42, 153.04, 140.20, 139.15, 126.54, 125.99, 125.92, 125.57, 109.35, 106.11, 102.60, 96.14, 92.61, 63.49, 60.99, 56.56, 56.37, 55.95, 34.91, 31.28.</p> <p><b>HRMS (ESI)</b> calcd for C<sub>34</sub>H<sub>35</sub>NO<sub>9</sub> [M+H]<sup>+</sup>: 602.23846, found 602.23730. White solid, m.p. 183.2-184.4 °C, yield 83%.</p>                                                                                                                                                                                                                                                                                                                                                                                                                                                                                                                                                                                                                        |

## 4.2 Spectrum of compounds Y1-Y28

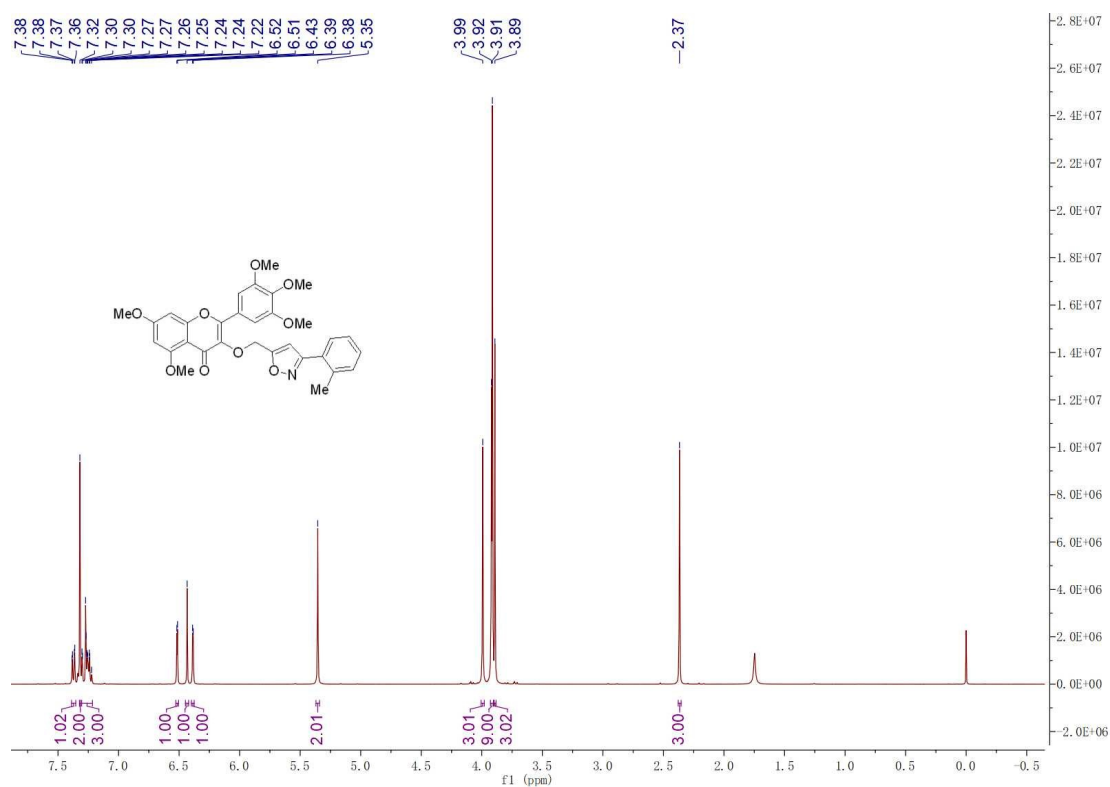

<sup>1</sup>H NMR spectra of compound Y1

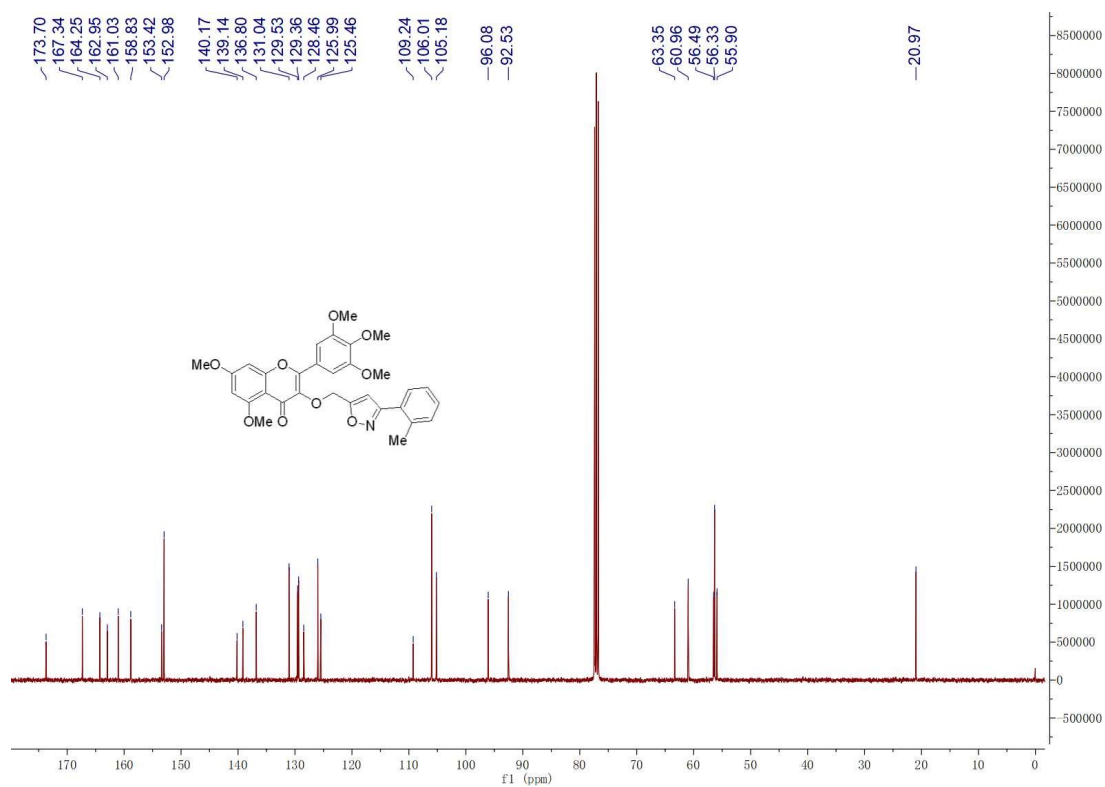

<sup>13</sup>C NMR spectra of compound Y1

16 #43 RT: 0.43 AV: 1 NL: 6.77E8  
T: FTMS + p ESI Full ms [150.0000-2200.0000]

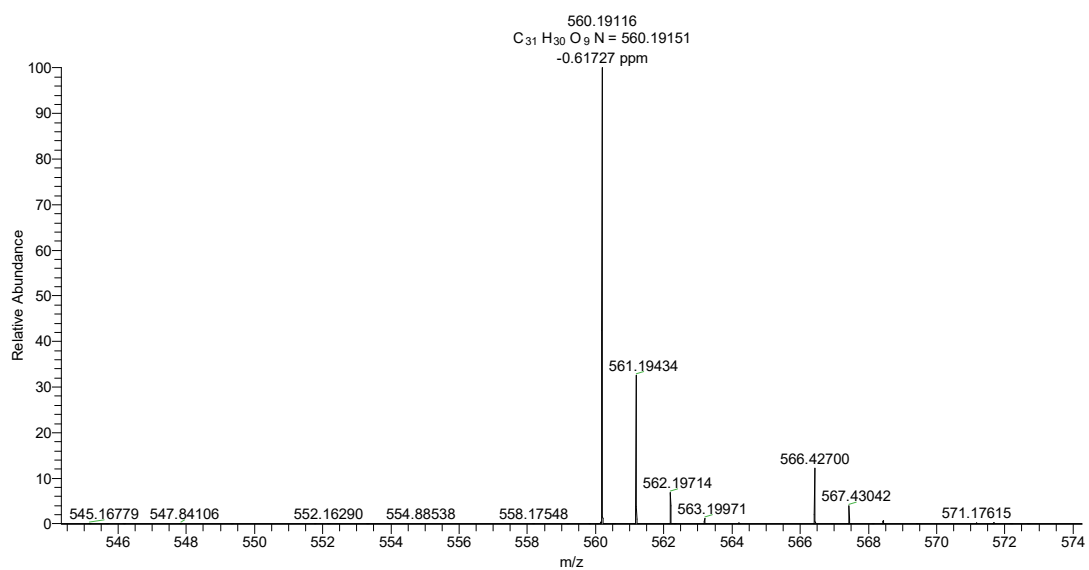

HRMS spectra of compound Y1

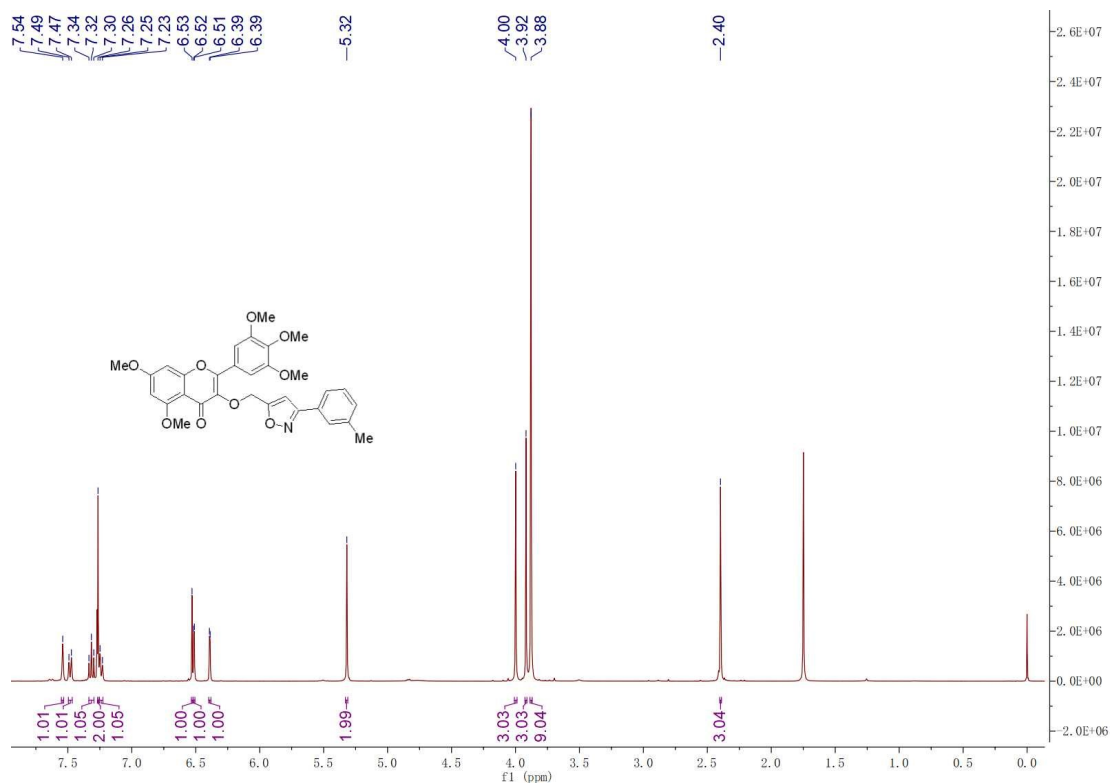

<sup>1</sup>H NMR spectra of compound Y2

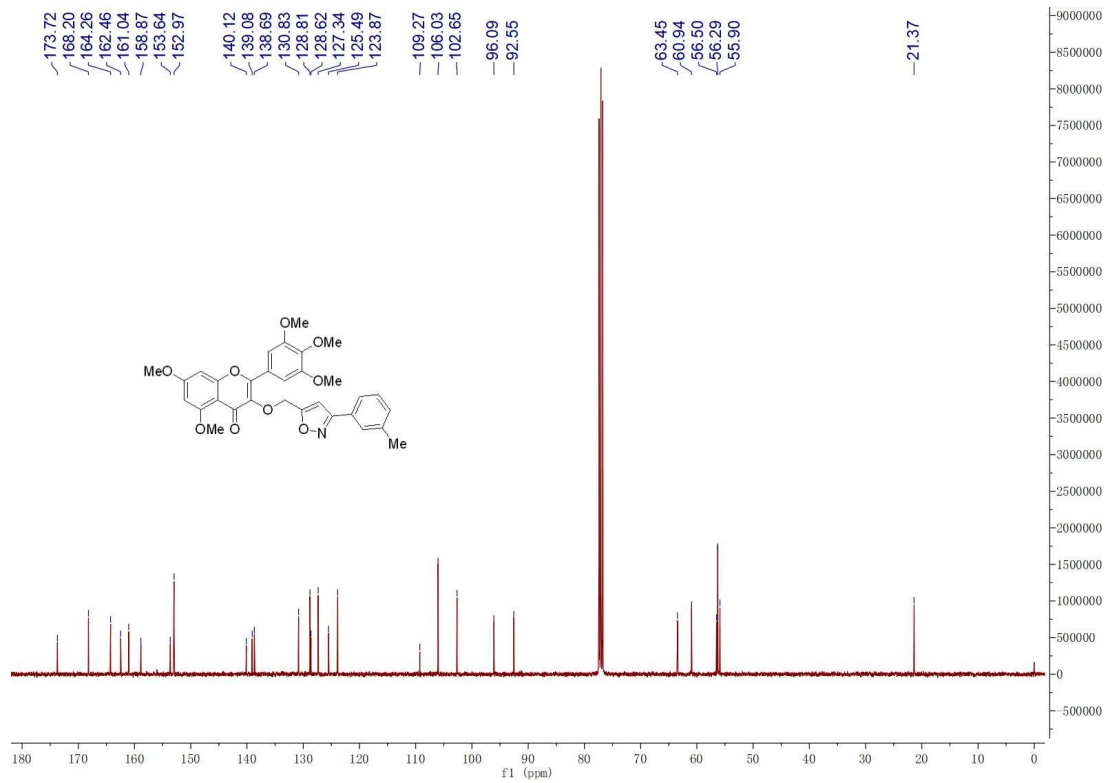

<sup>13</sup>C NMR spectra of compound Y2

17 #43 RT: 0.43 AV: 1 NL: 4.44E8  
T: FTMS + p ESI Full ms [150.0000-2200.0000]

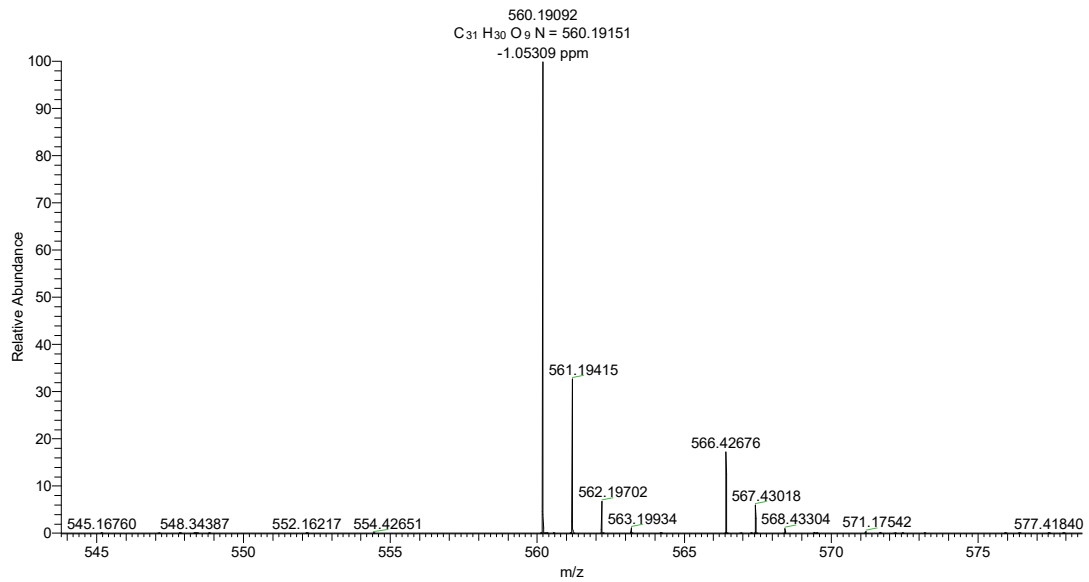

HRMS spectra of compound Y2

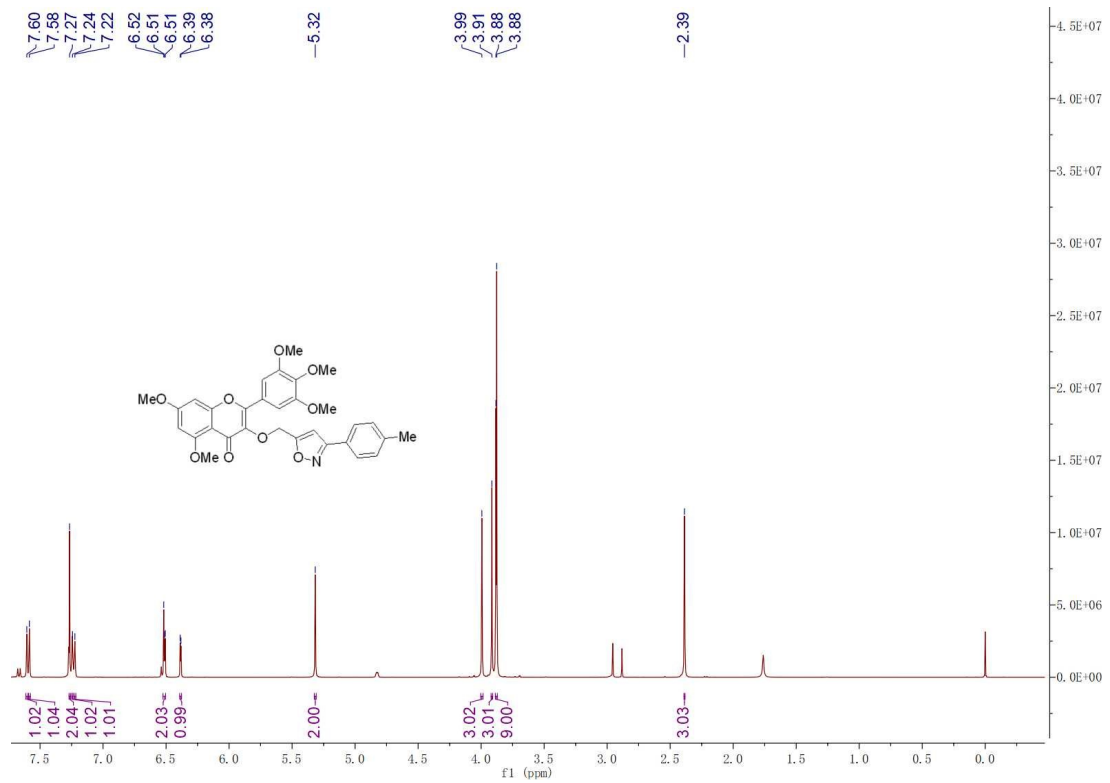

<sup>1</sup>H NMR spectra of compound Y3

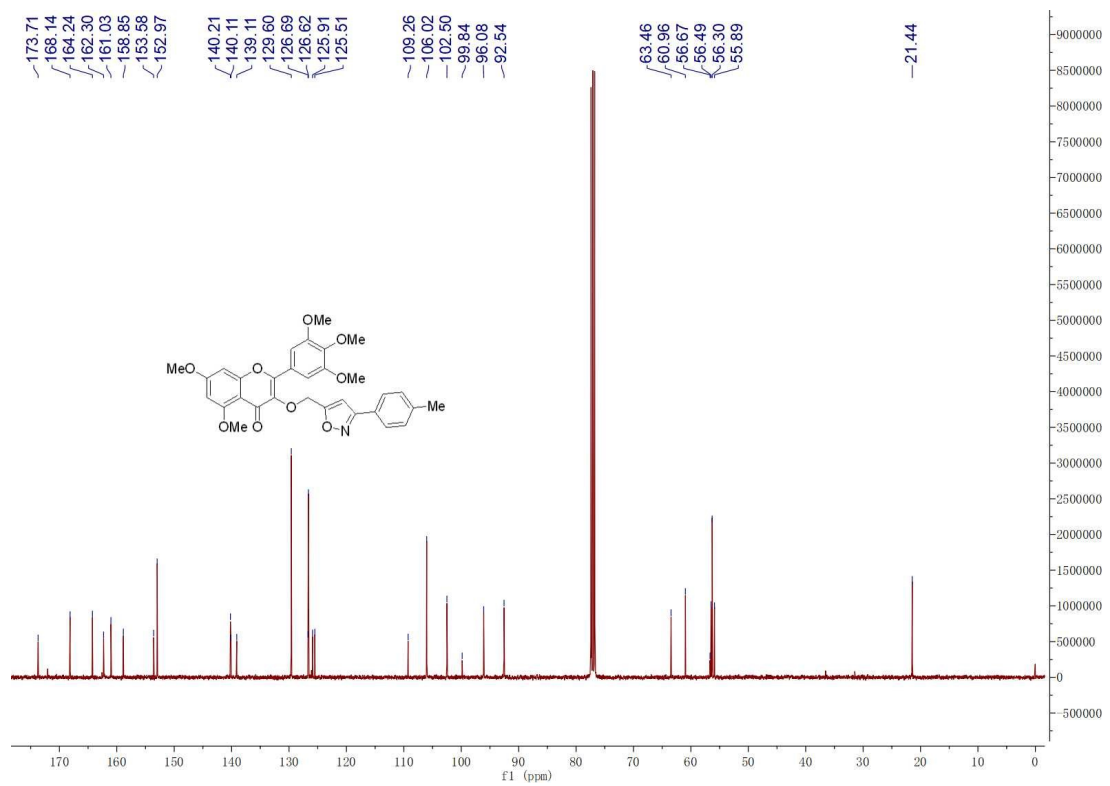

<sup>13</sup>C NMR spectra of compound Y3



18 #53 RT: 0.53 AV: 1 NL: 2.02E8  
T: FTMS + p ESI Full ms [150.0000-2200.0000]

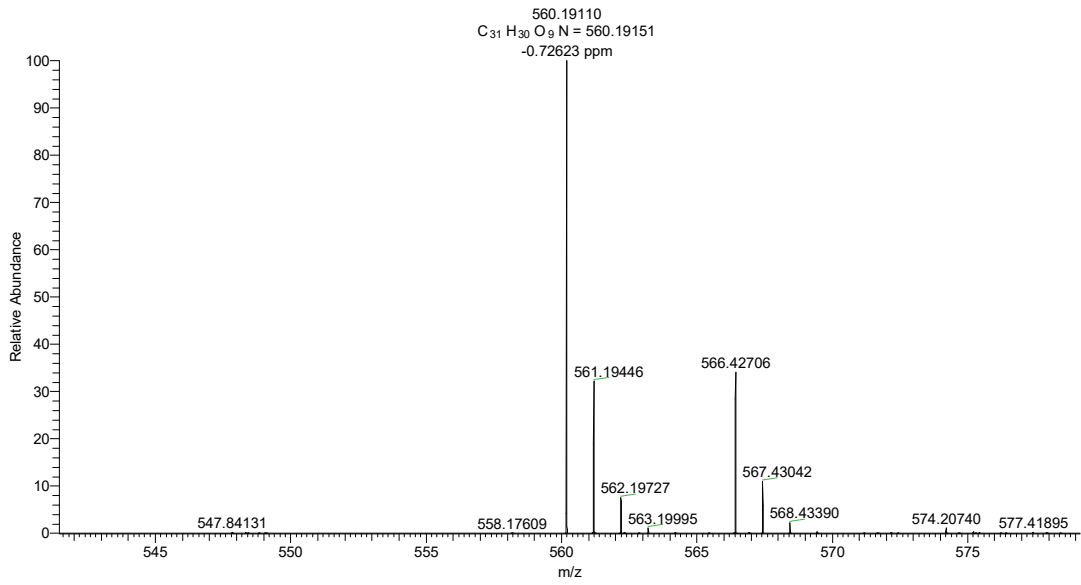

HRMS spectra of compound Y3

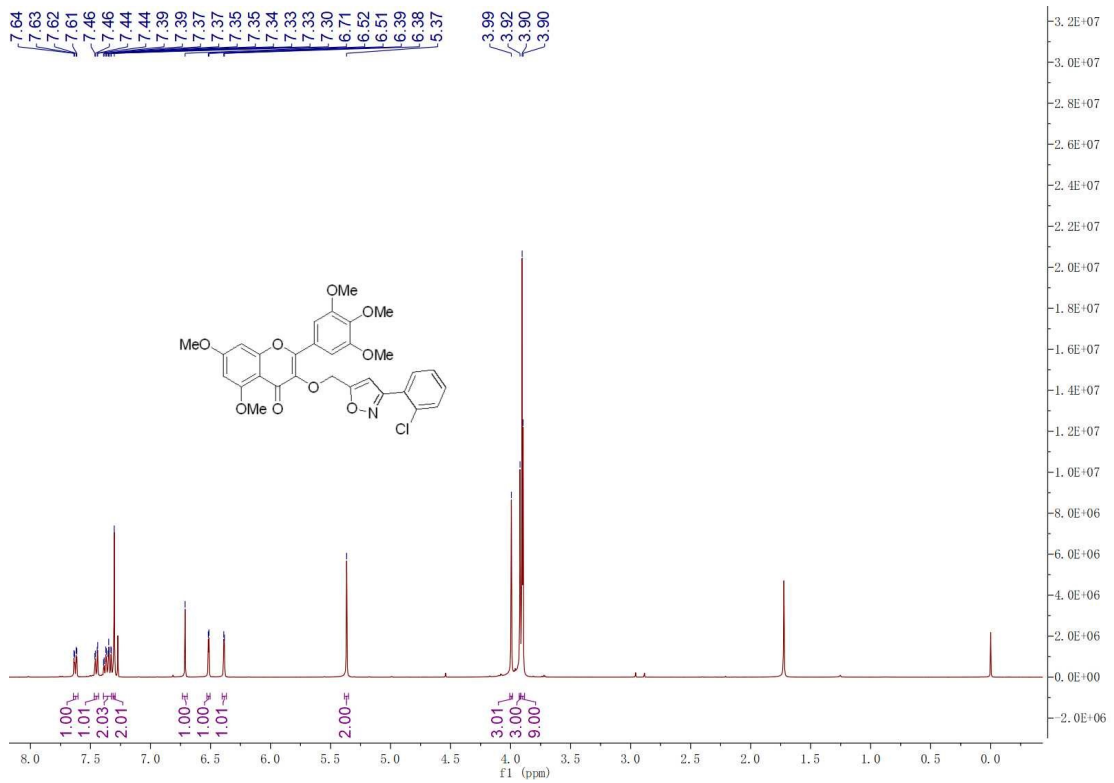

<sup>1</sup>H NMR spectra of compound Y4

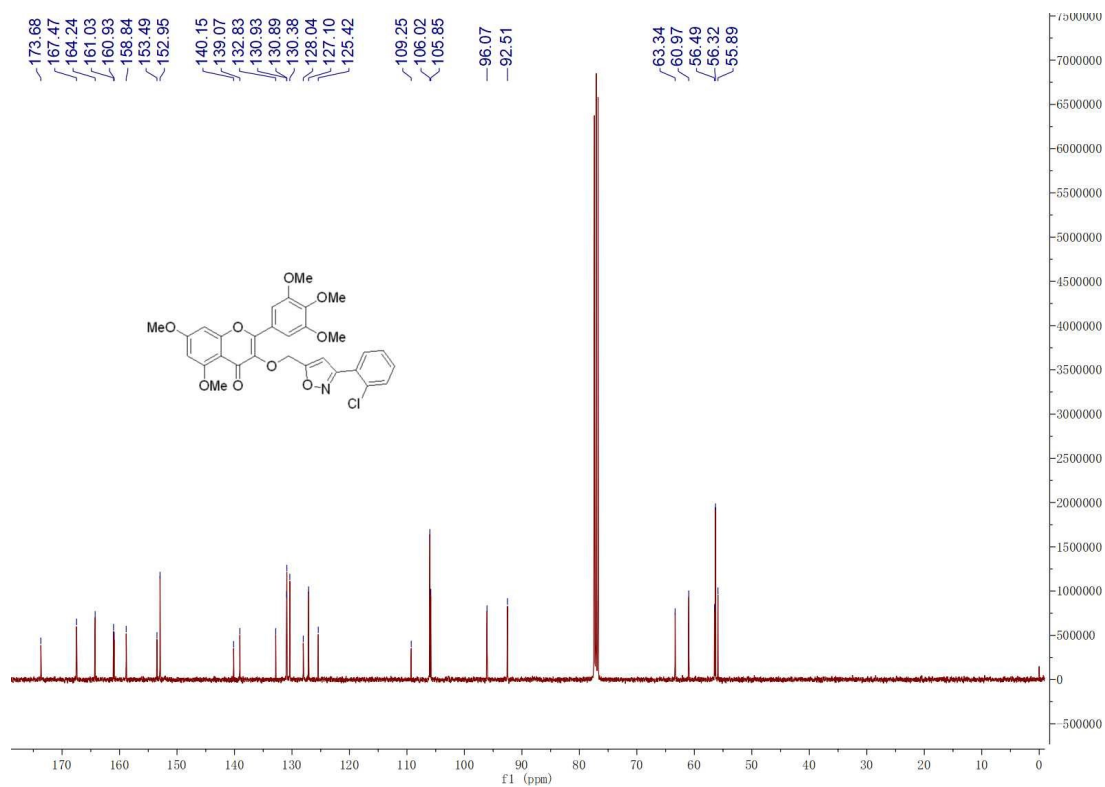

<sup>13</sup>C NMR spectra of compound Y4

19 #41 RT: 0.41 AV: 1 NL: 1.67E7  
 T: FTMS + p ESI Full ms [150.0000-2200.0000]

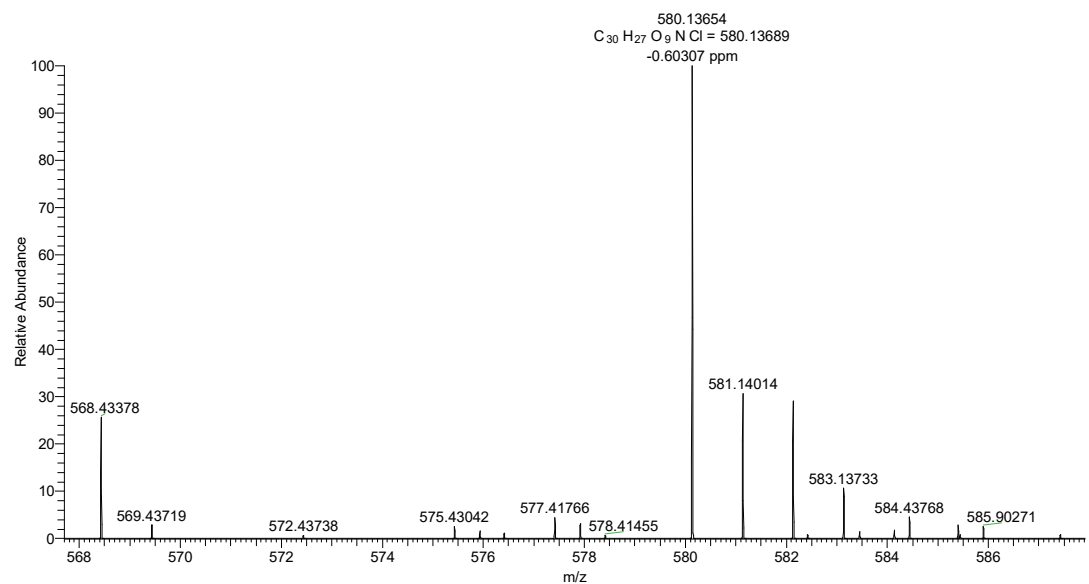

HRMS spectra of compound Y4

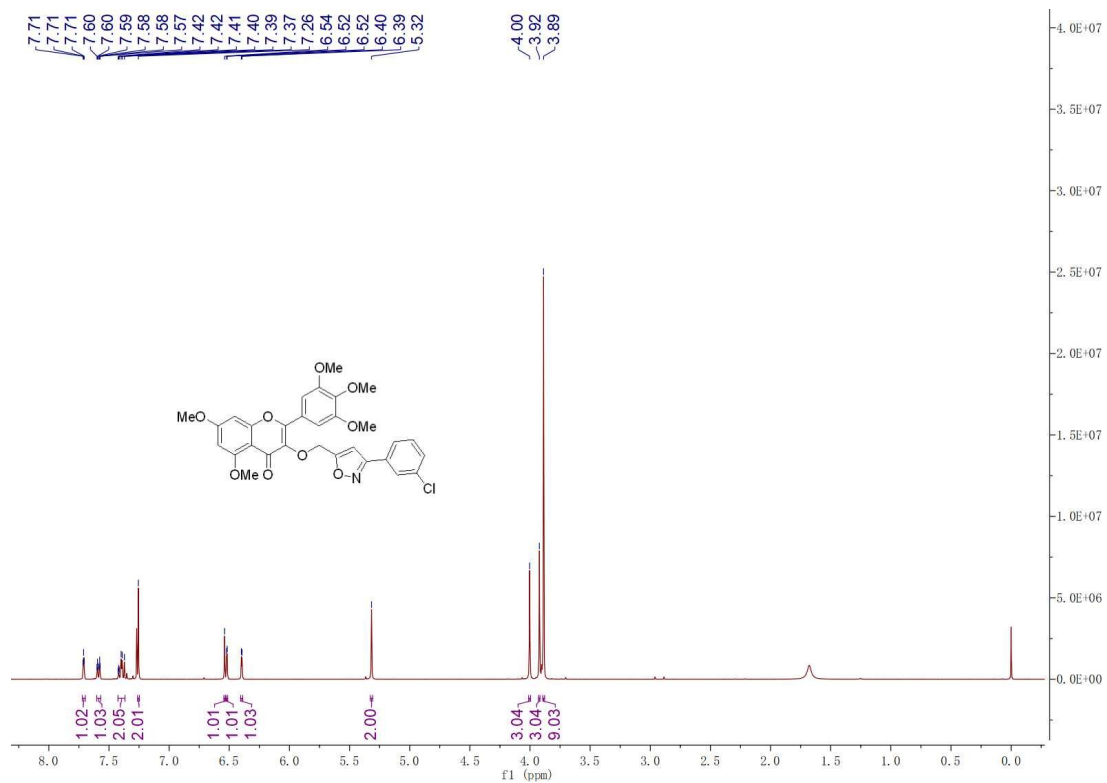

<sup>1</sup>H NMR spectra of compound Y5

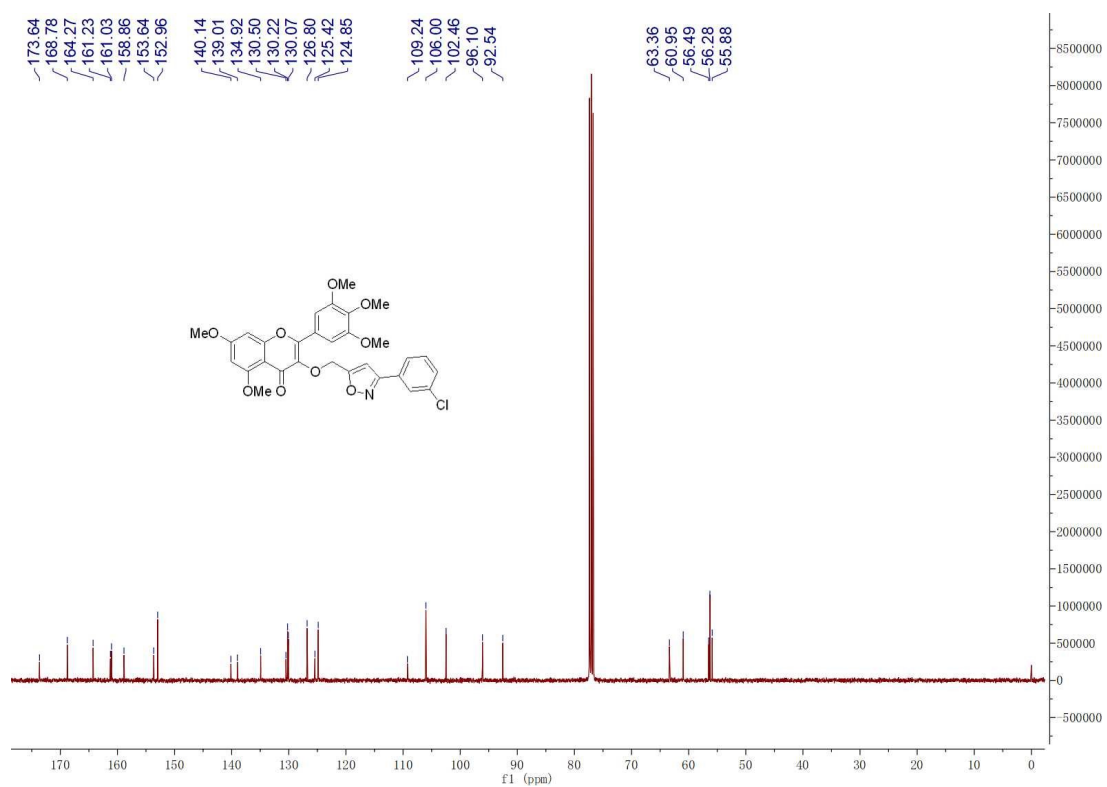

<sup>13</sup>C NMR spectra of compound Y5

20 #45 RT: 0.45 AV: 1 NL: 2.04E8  
T: FTMS + p ESI Full ms [150.0000-2200.0000]

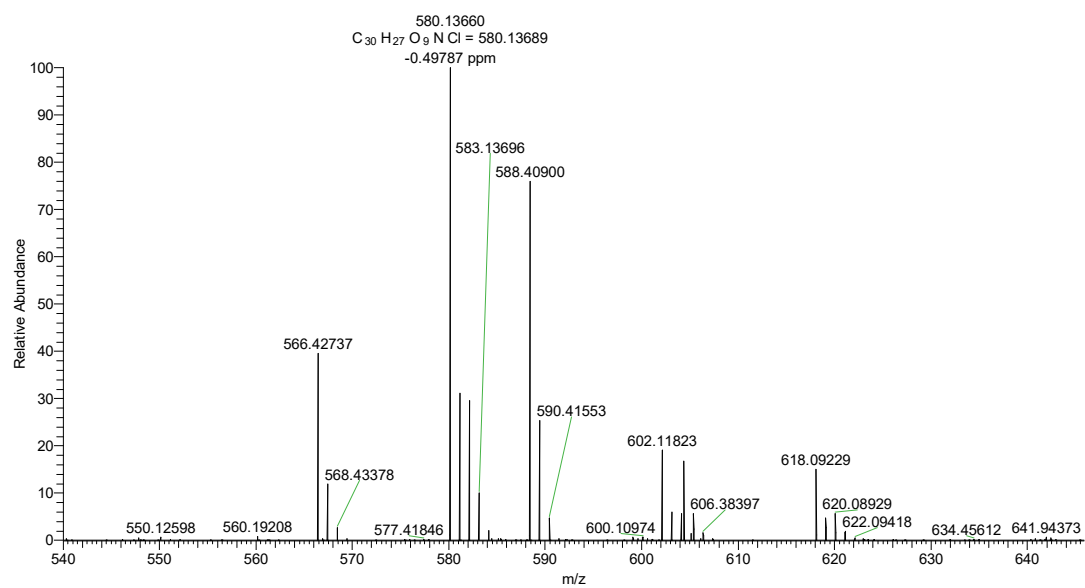

HRMS spectra of compound Y5

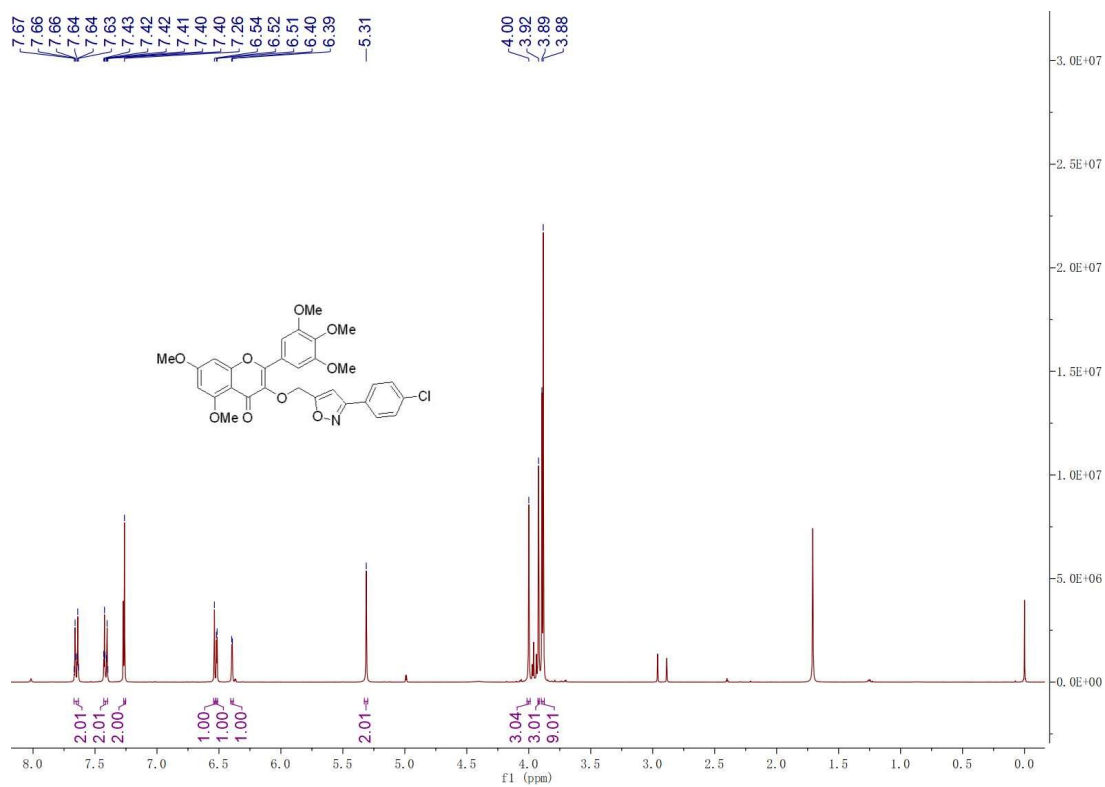

<sup>1</sup>H NMR spectra of compound Y6

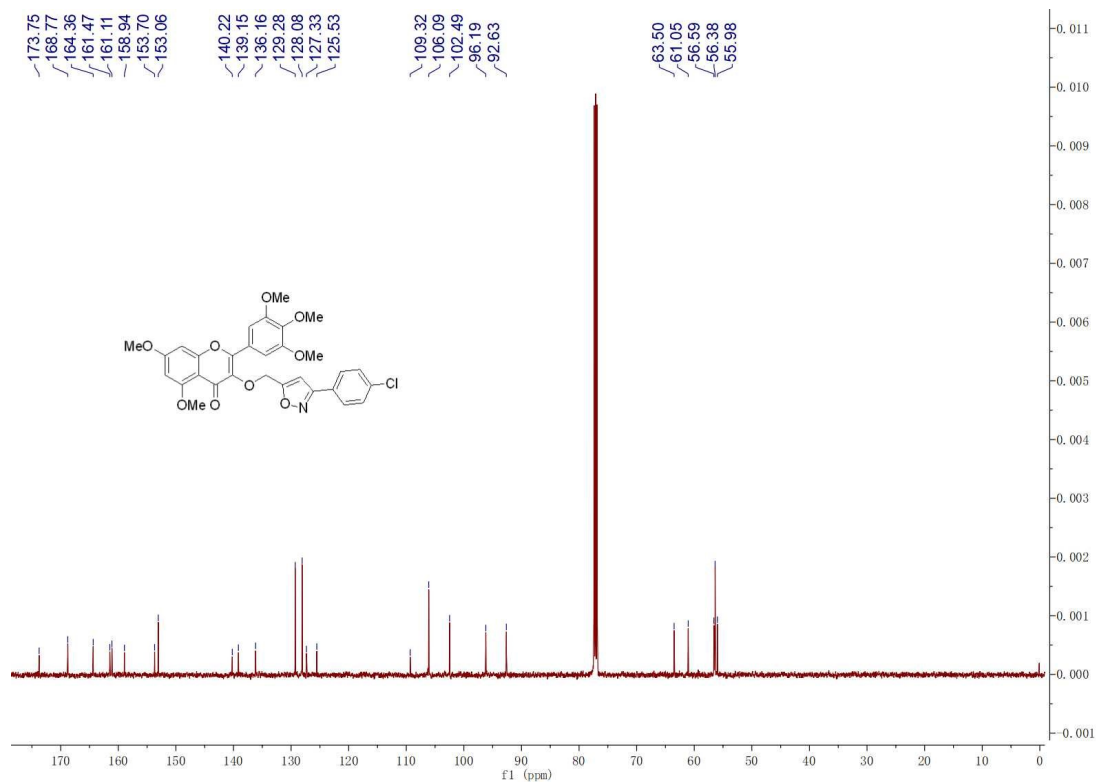

<sup>13</sup>C NMR spectra of compound Y6

21 #49 RT: 0.49 AV: 1 NL: 5.73E7  
 T: FTMS + p ESI Full ms [150.0000-2200.0000]

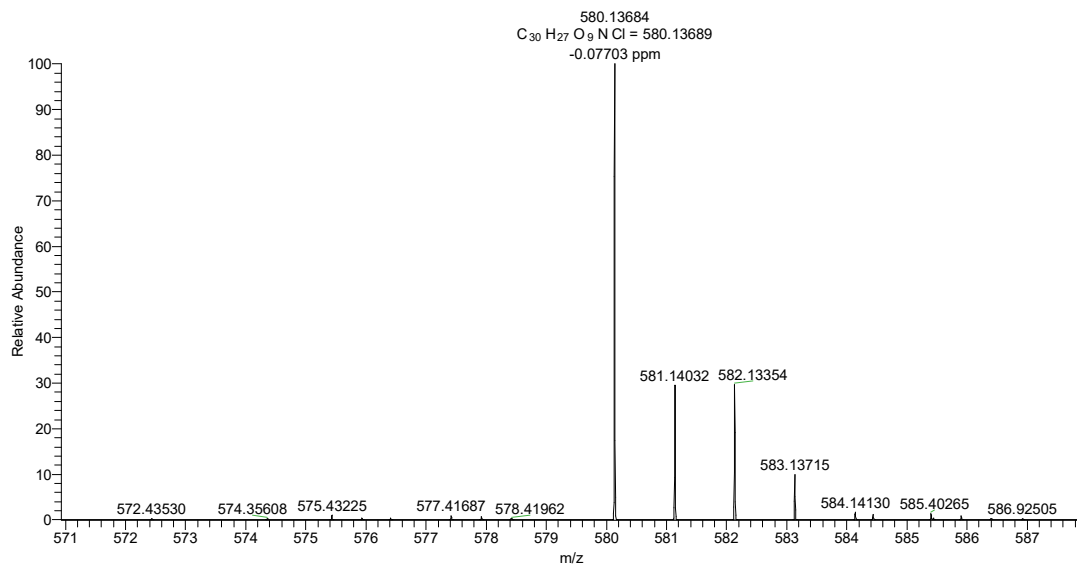

HRMS spectra of compound Y6

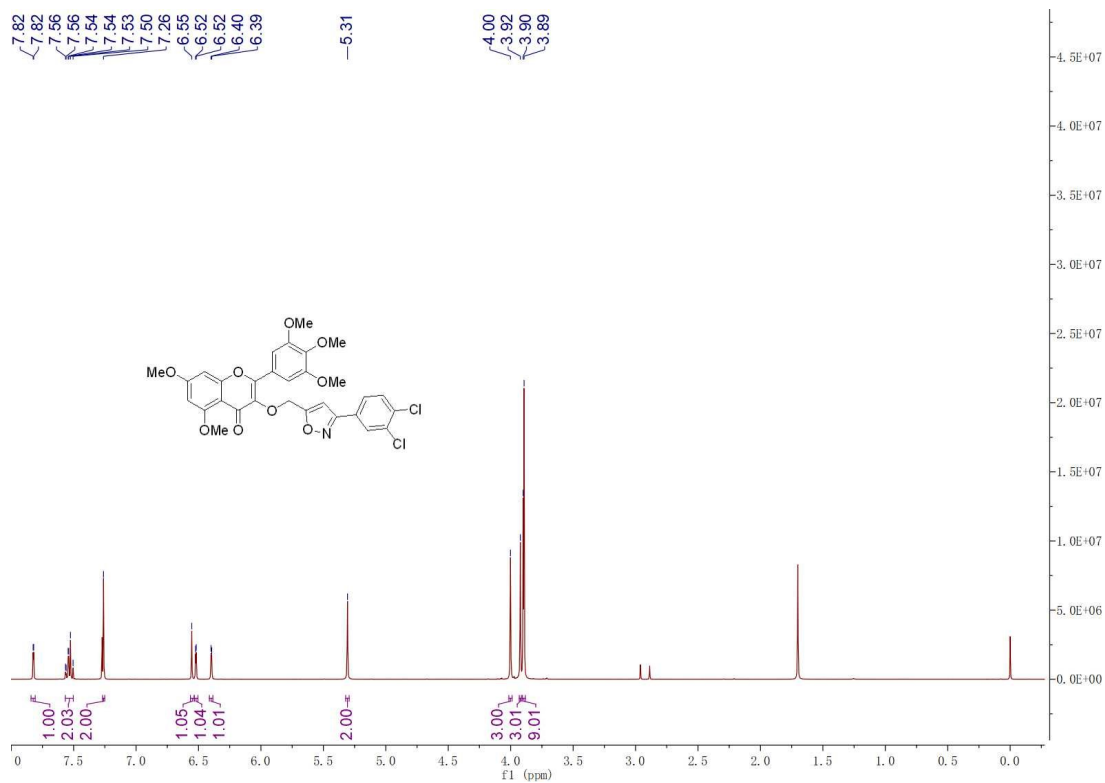

**<sup>1</sup>H NMR spectra of compound Y7**

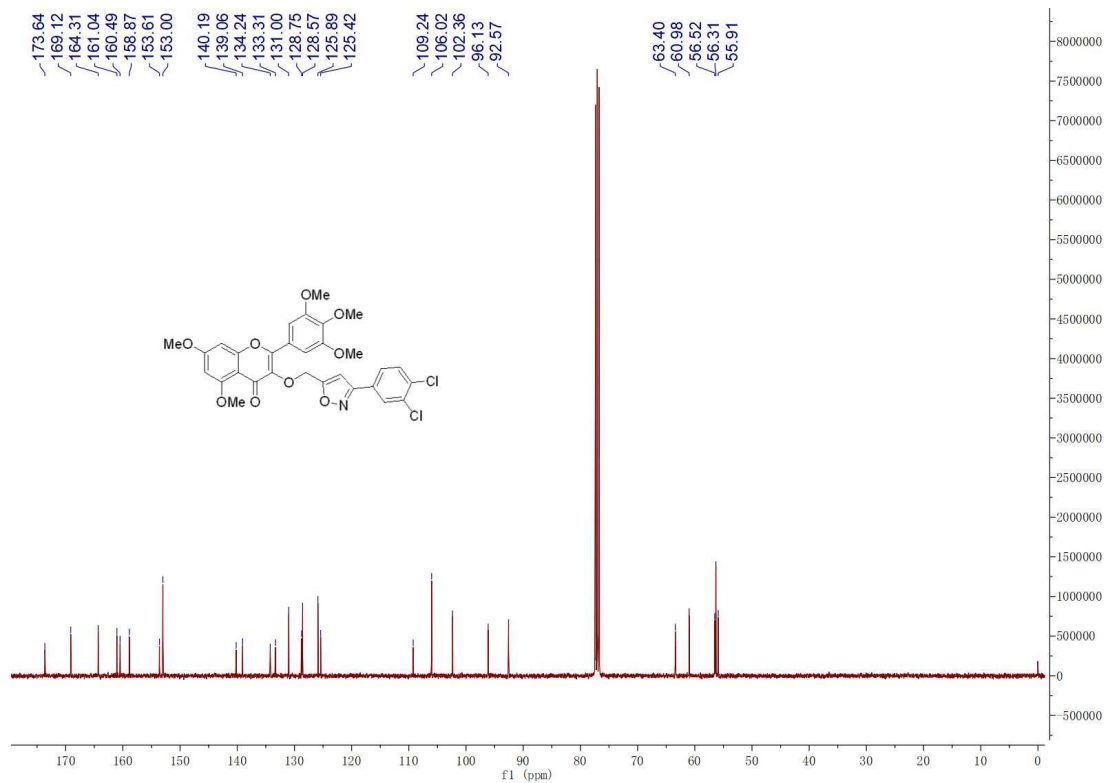

**<sup>13</sup>C NMR spectra of compound Y7**

22 #51 RT: 0.51 AV: 1 NL: 4.36E6  
T: FTMS + p ESI Full ms [150.0000-2200.0000]

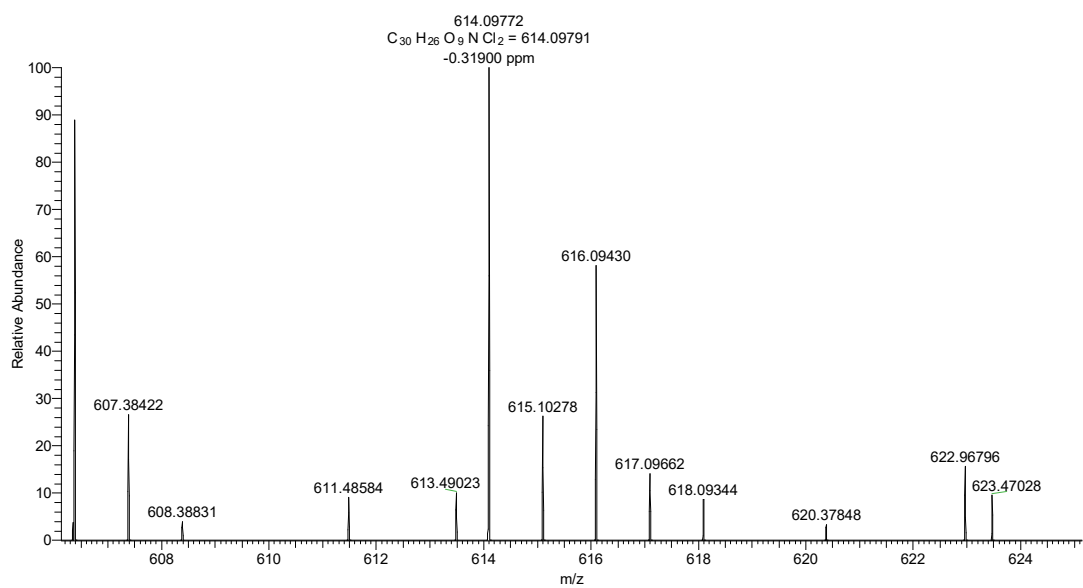

HRMS spectra of compound Y7

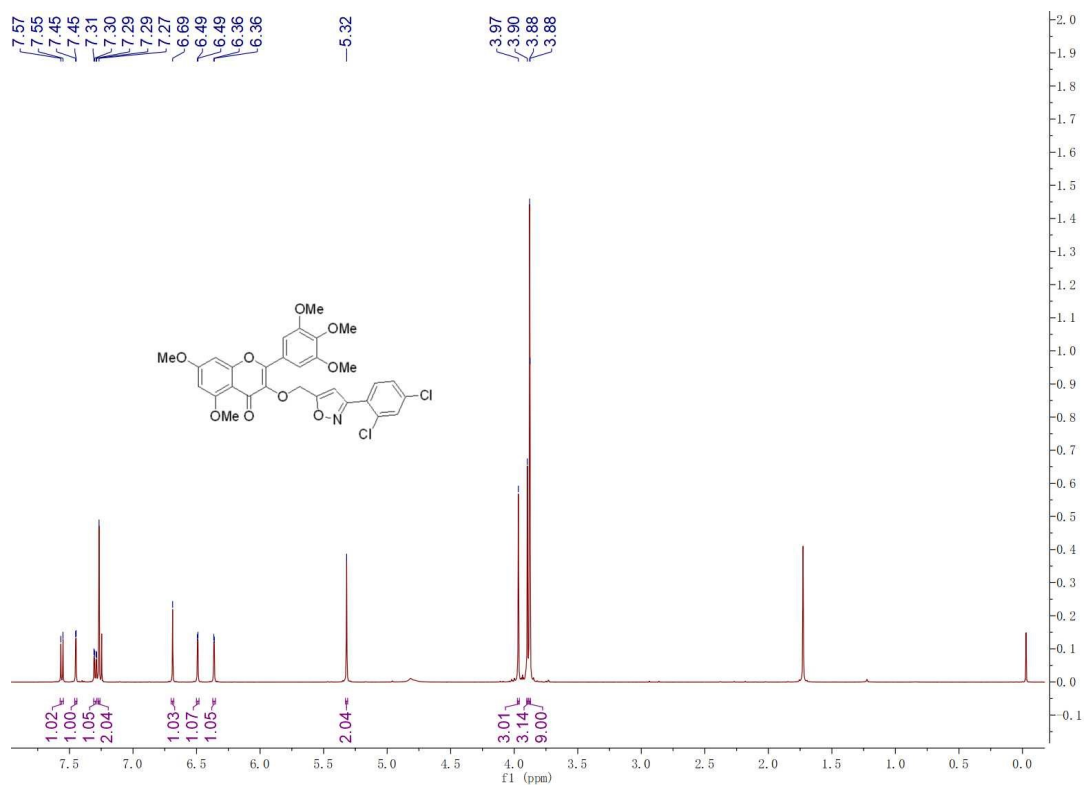

<sup>1</sup>H NMR spectra of compound Y8

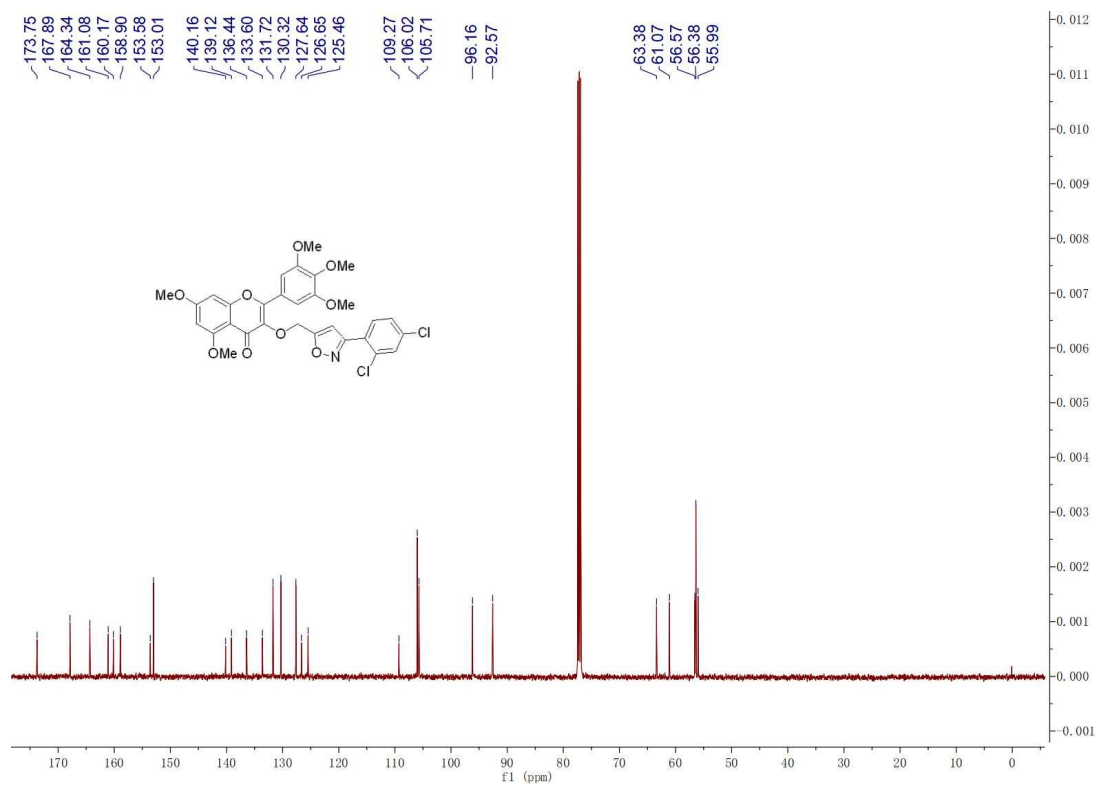

<sup>13</sup>C NMR spectra of compound Y8

23 #47 RT: 0.47 AV: 1 NL: 1.55E6  
 T: FTMS + p ESI Full ms [150.0000-2200.0000]

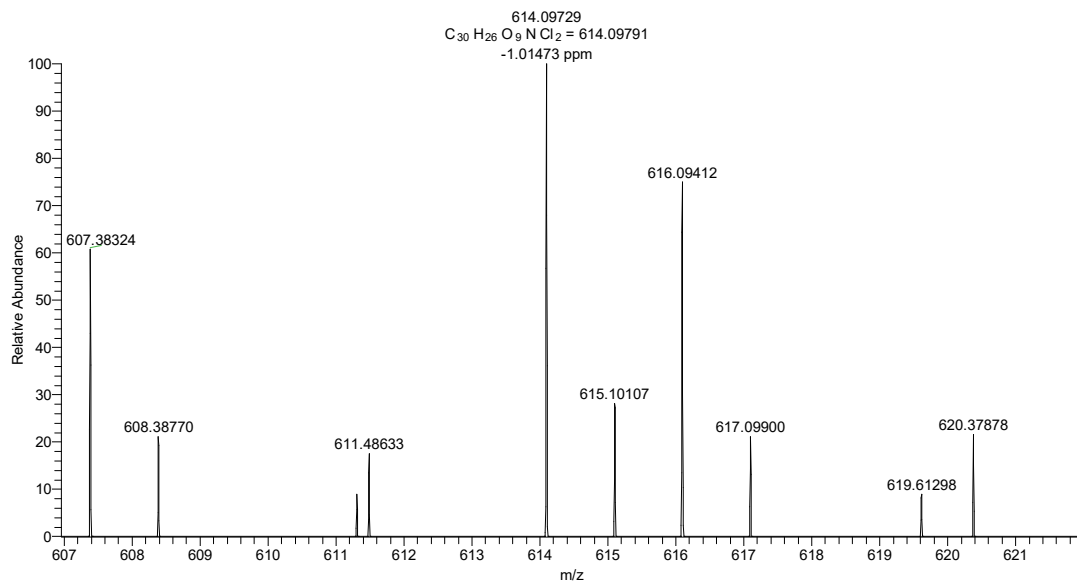

HRMS spectra of compound Y8



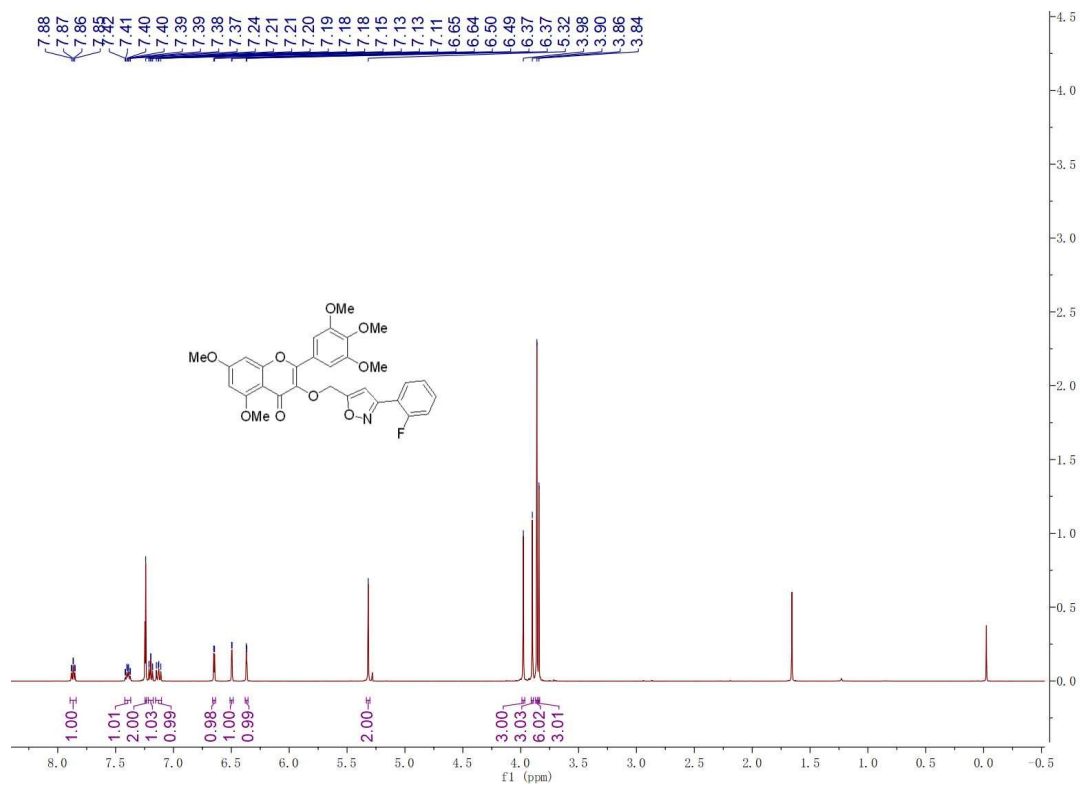

<sup>1</sup>H NMR spectra of compound Y9

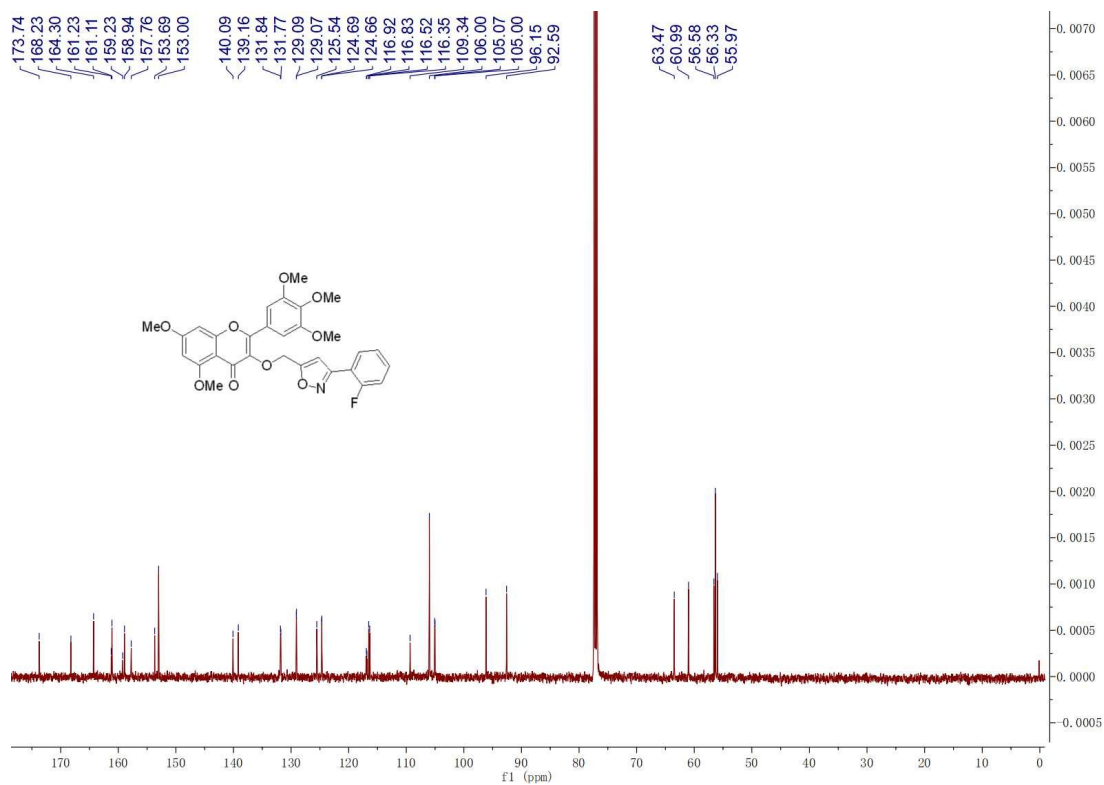

<sup>13</sup>C NMR spectra of compound Y9

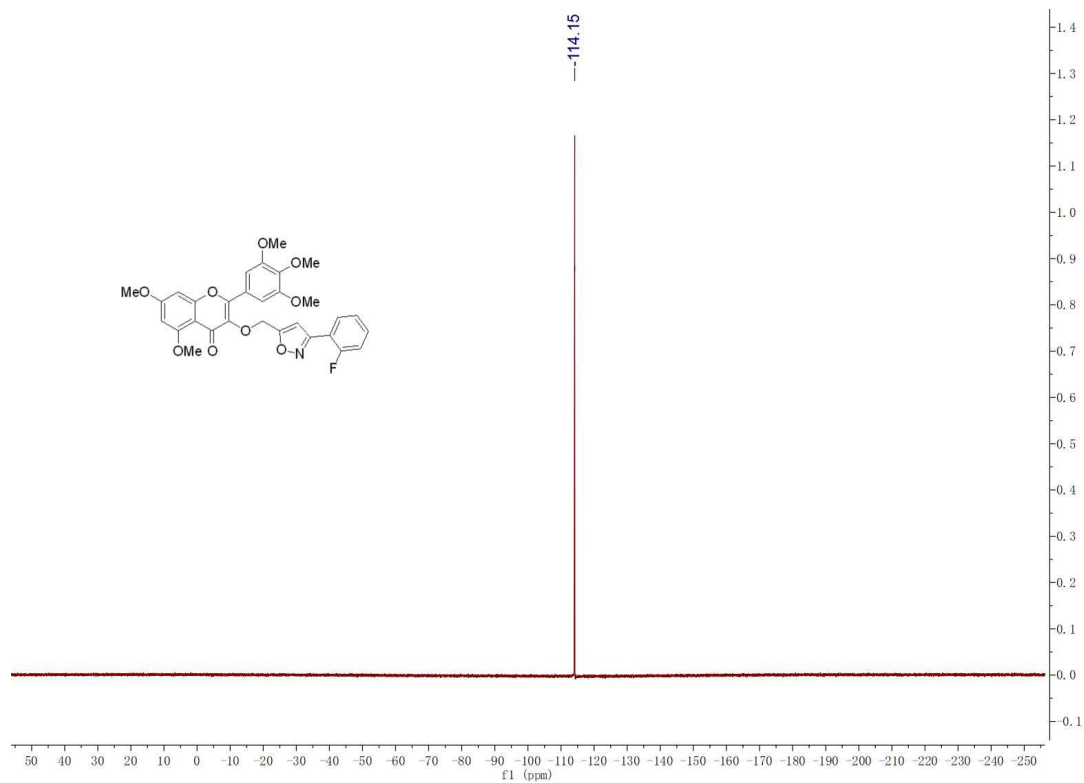

<sup>19</sup>NMR spectra of compound Y9

24 #59 RT: 0.59 AV: 1 NL: 4.62E6  
 T: FTMS + p ESI Full ms [150.0000-2200.0000]

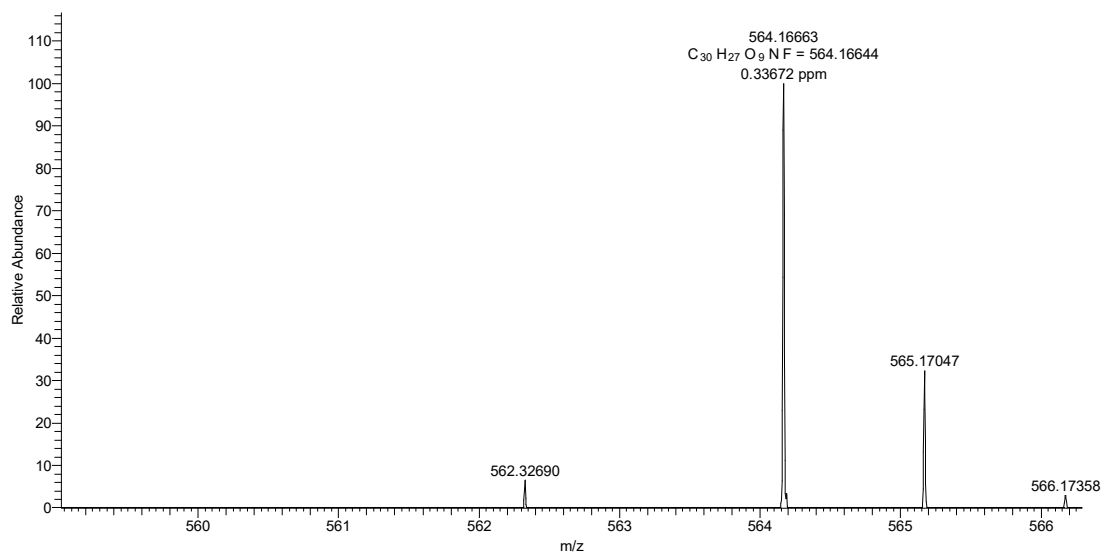

HRMS spectra of compound Y9

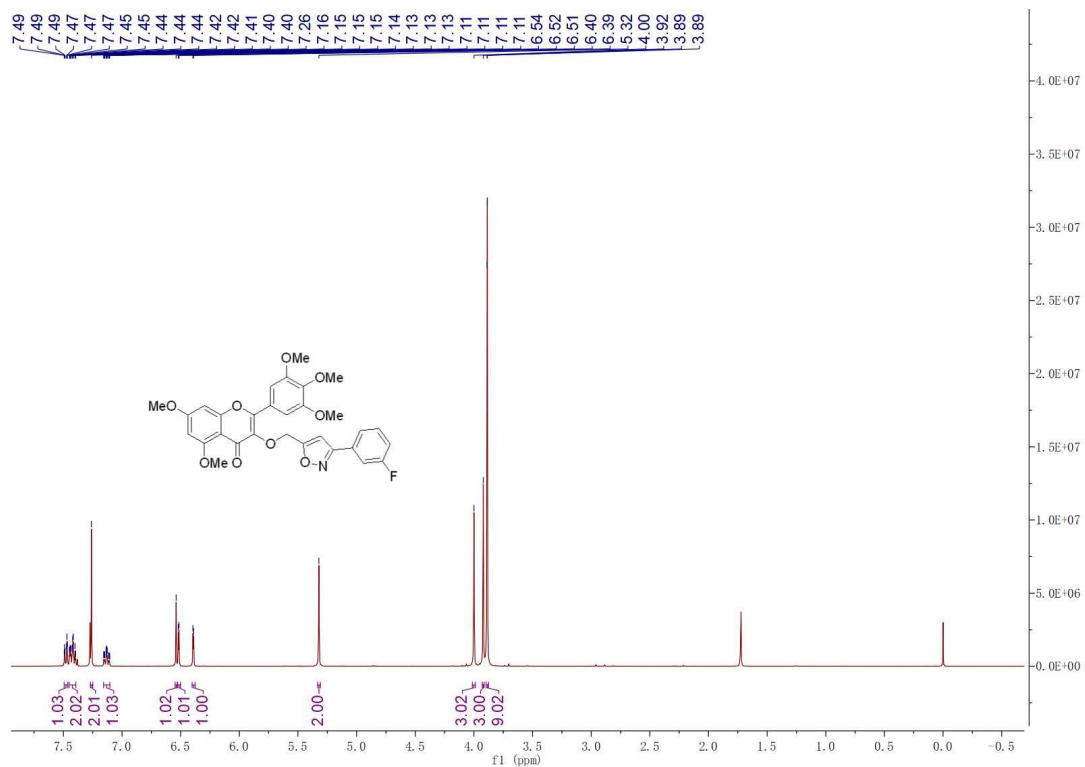

<sup>1</sup>H NMR spectra of compound Y10

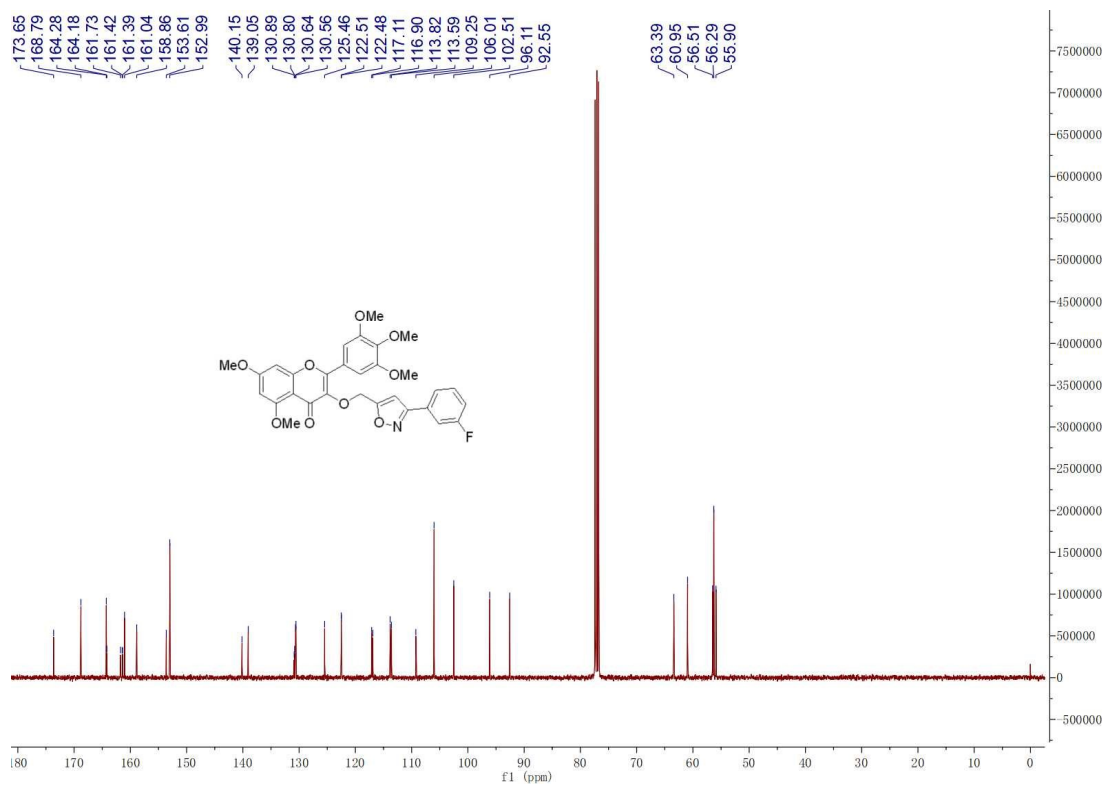

<sup>13</sup>C NMR spectra of compound Y10

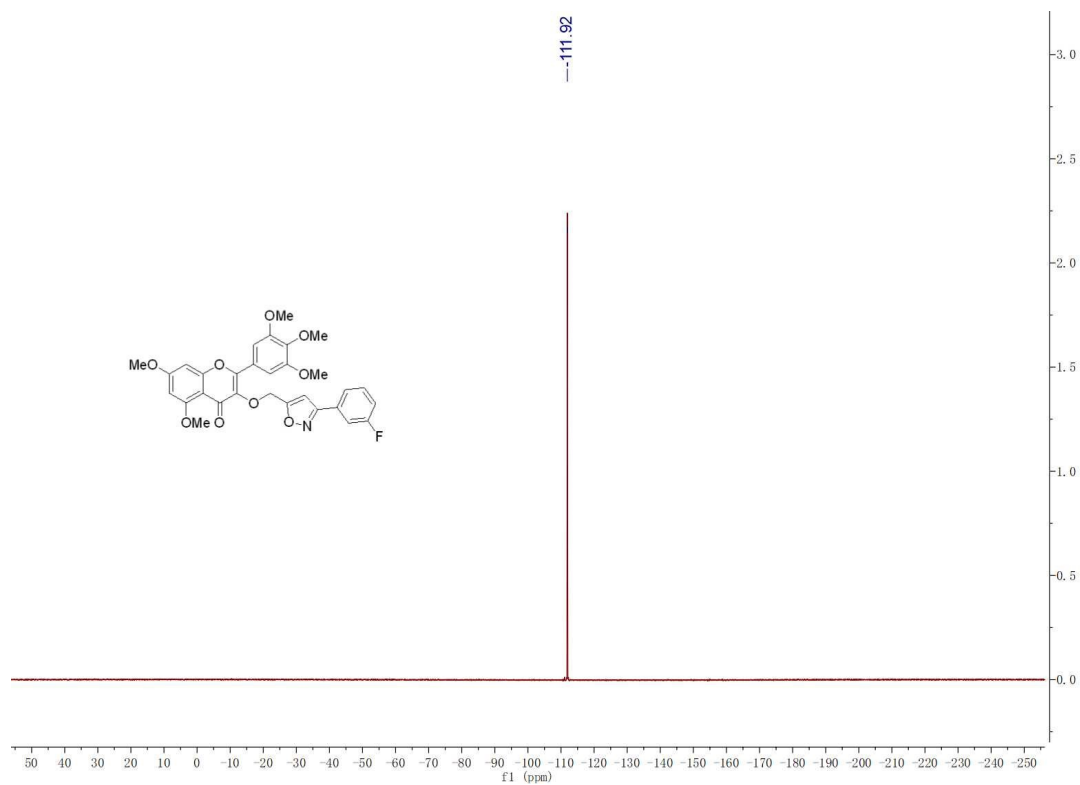

$^{19}\text{F}$  NMR spectra of compound Y10

25 #37 RT: 0.37 AV: 1 NL: 1.56E8  
T: FTMS + p ESI Full ms [150.0000-2200.0000]

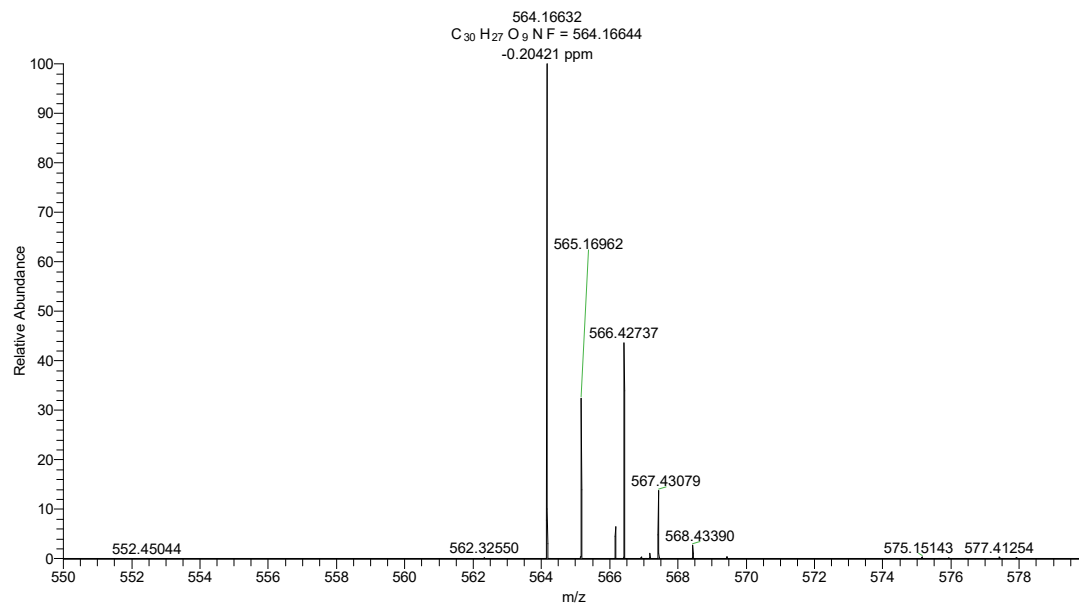

HRMS spectra of compound Y10

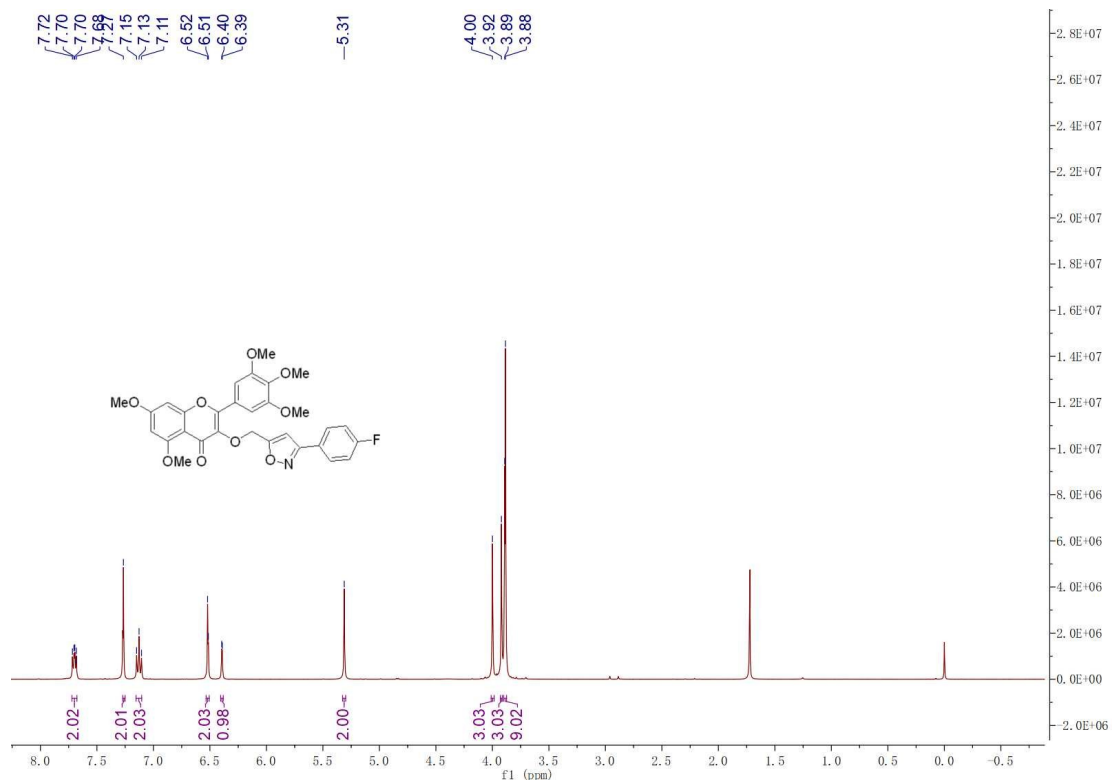

<sup>1</sup>H NMR spectra of compound Y11

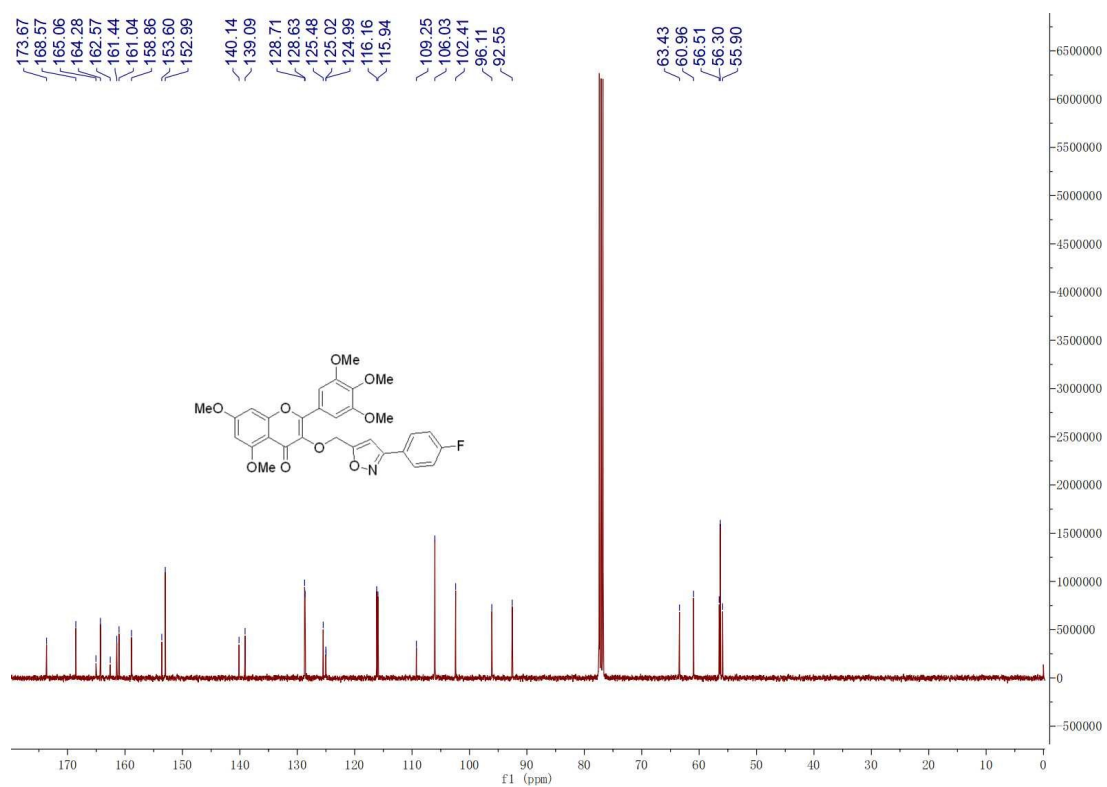

<sup>13</sup>C NMR spectra of compound Y11

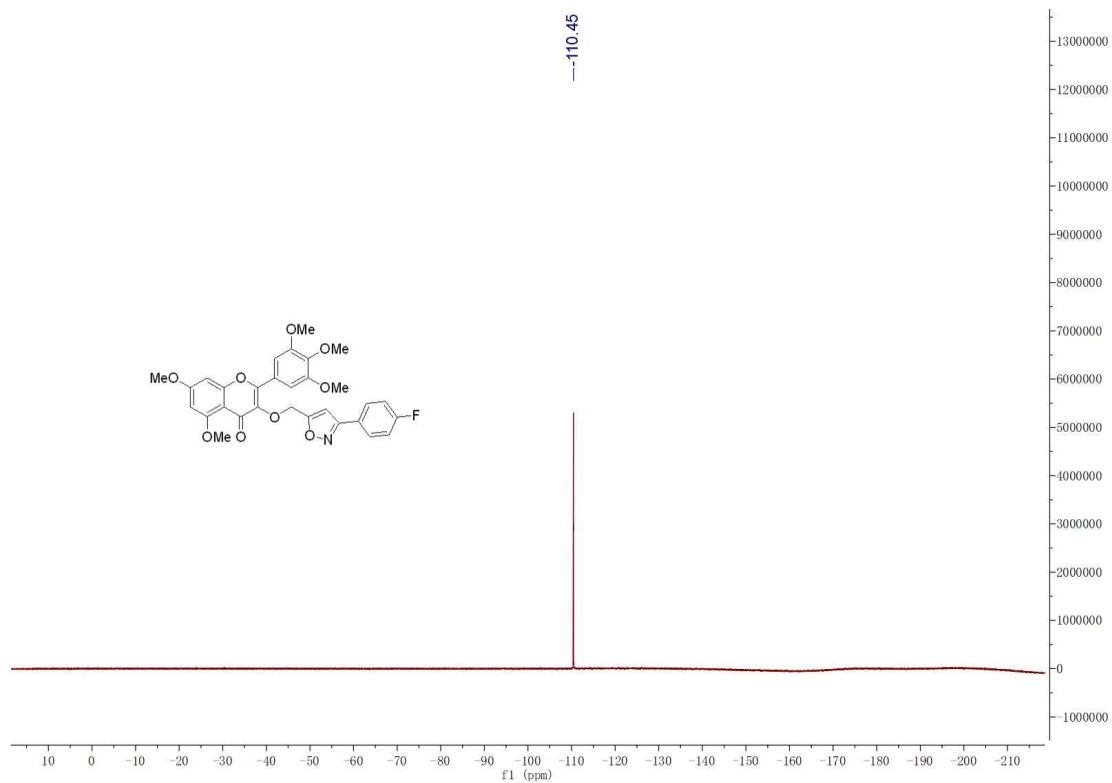

$^{19}\text{F}$  NMR spectra of compound Y11

26 #37 RT: 0.37 AV: 1 NL: 2.08E8  
 T: FTMS + p ESI Full ms [150.0000-2200.0000]

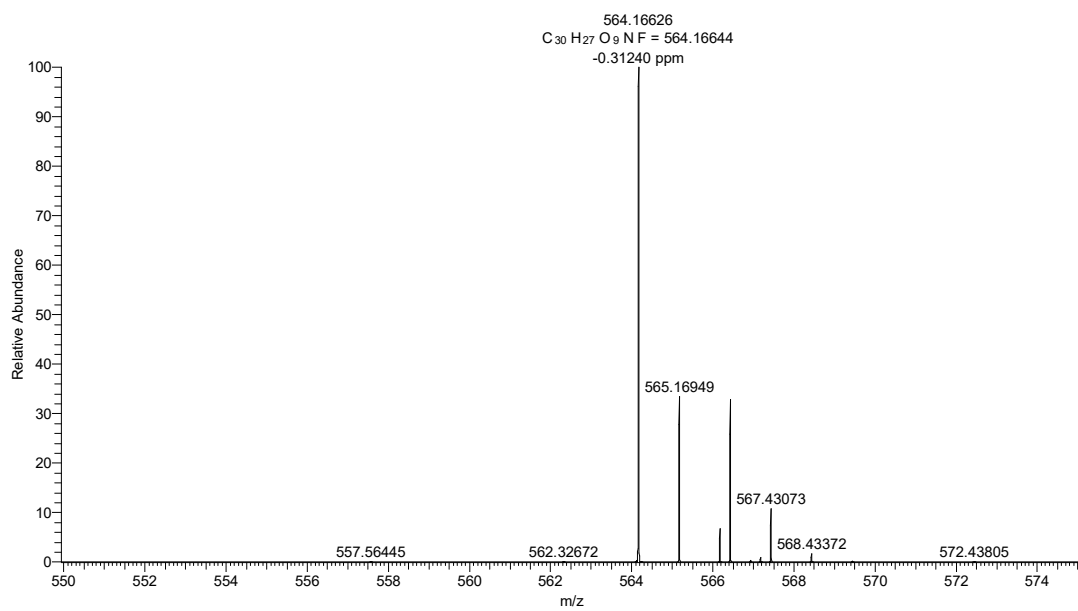

HRMS spectra of compound Y11

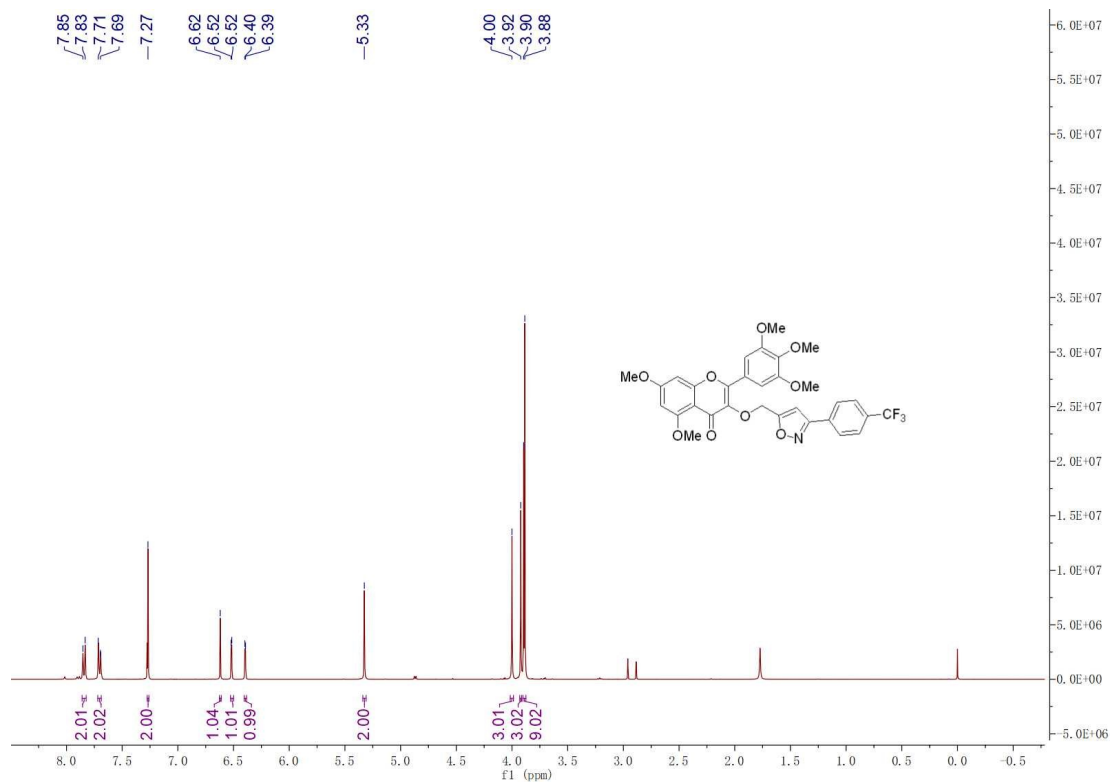

<sup>1</sup>H NMR spectra of compound Y12

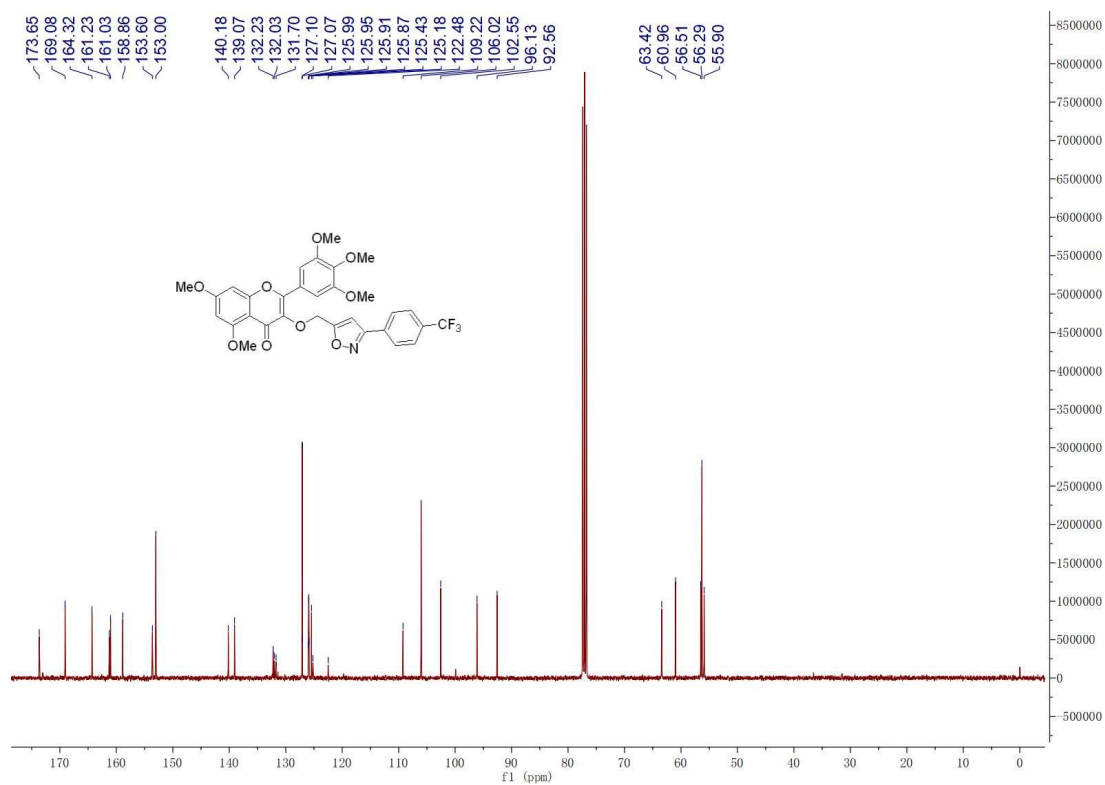

<sup>13</sup>C NMR spectra of compound Y12

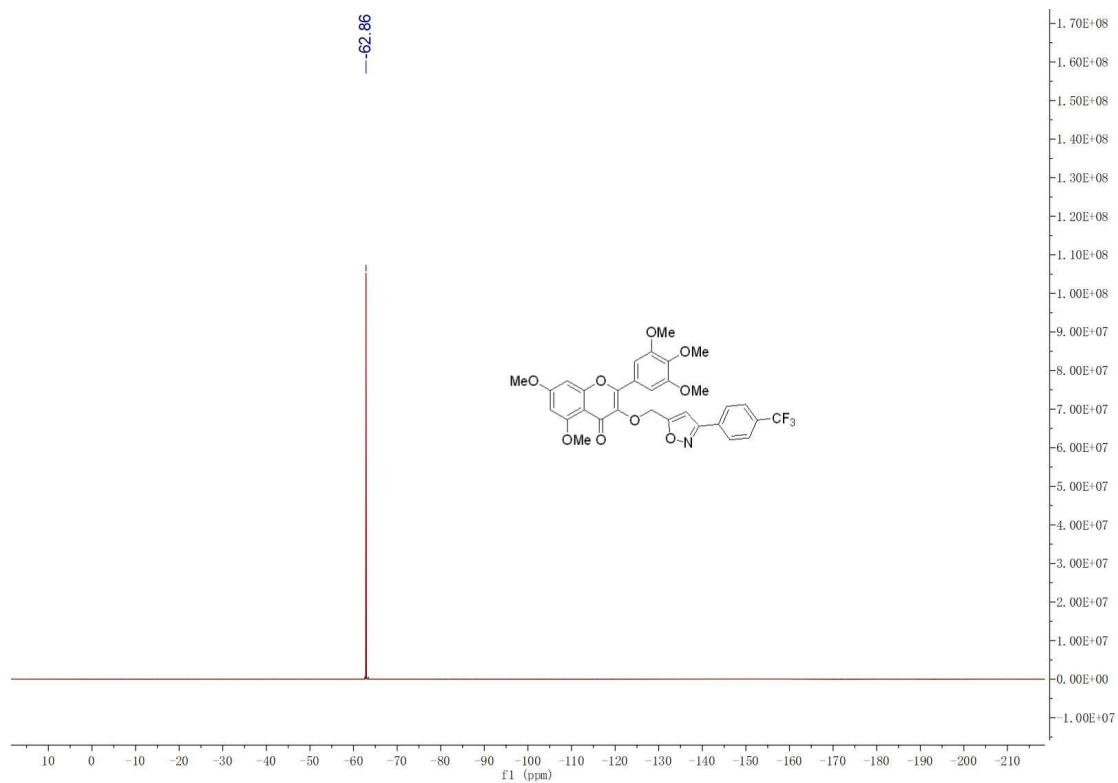

<sup>19</sup>F NMR spectra of compound Y12

27 #43 RT: 0.43 AV: 1 NL: 2.32E8  
T: FTMS + p ESI Full ms [150.0000-2200.0000]

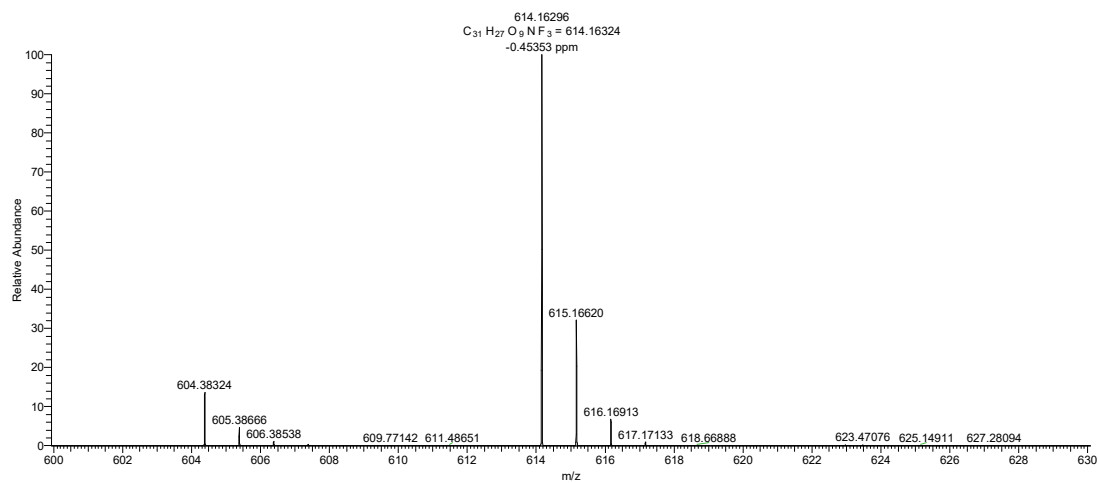

HRMS spectra of compound Y12



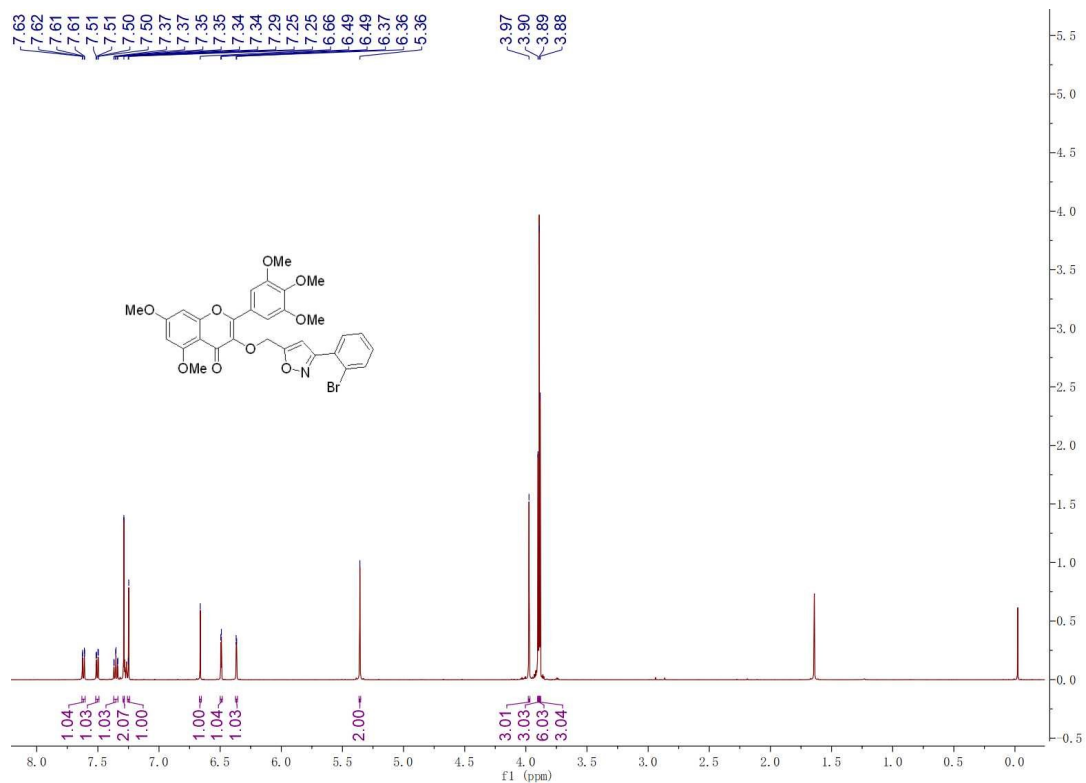

<sup>1</sup>H NMR spectra of compound Y13

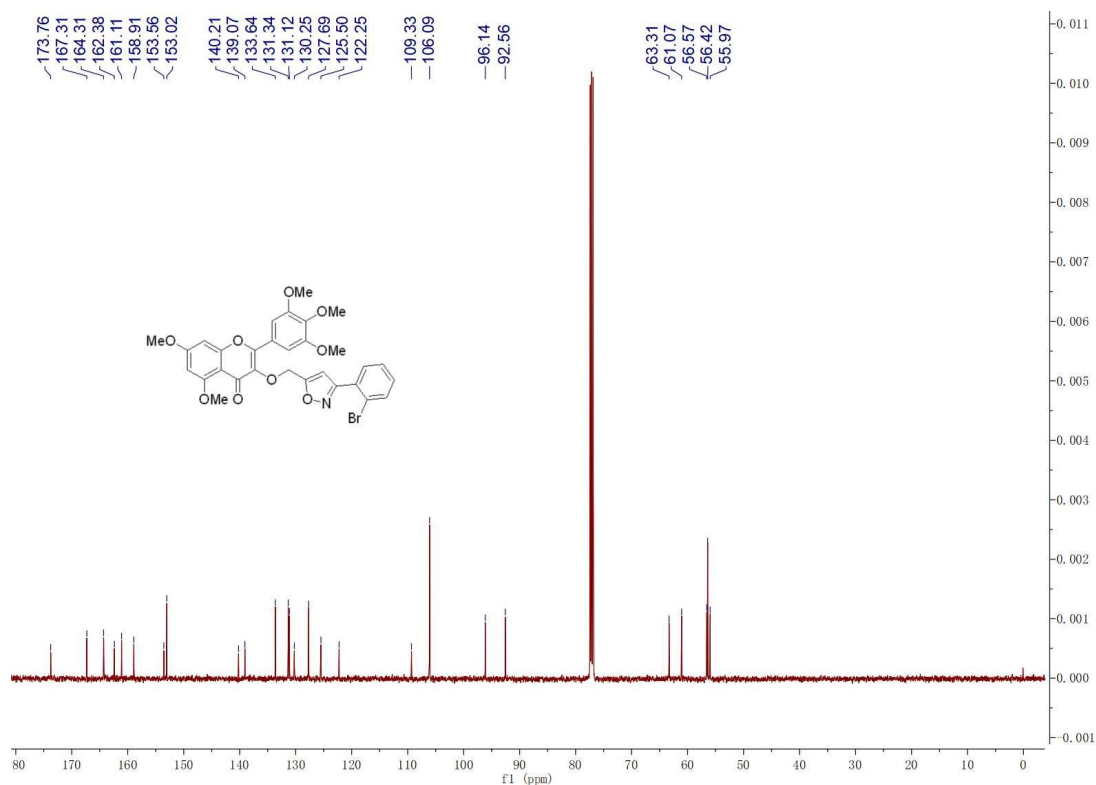

<sup>13</sup>C NMR spectra of compound Y13

54 #81 RT: 0.79 AV: 1 NL: 3.37E5  
T: FTMS + p ESI Full ms [150.0000-2200.0000]

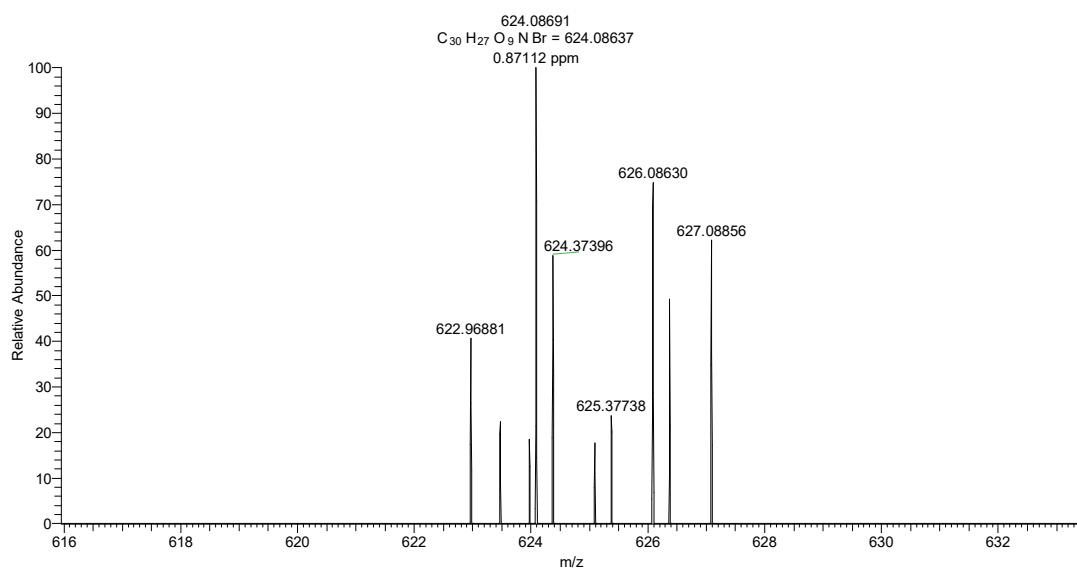

HRMS spectra of compound Y13

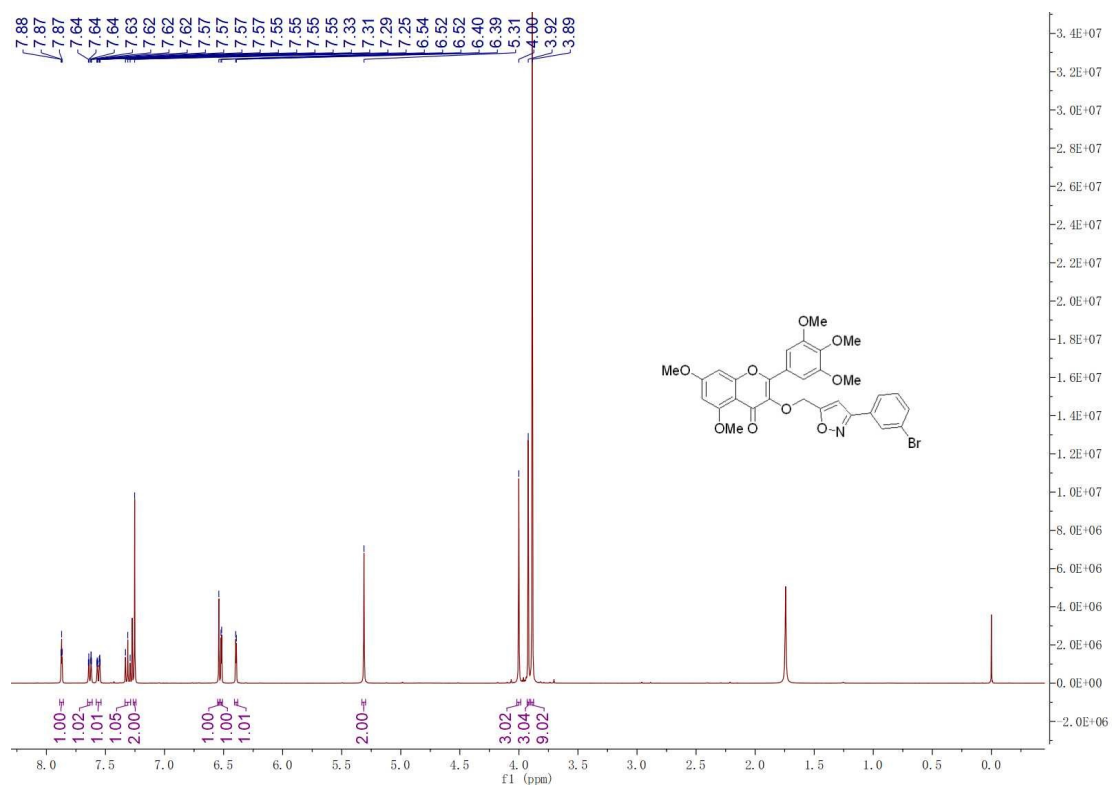

<sup>1</sup>H NMR spectra of compound Y14

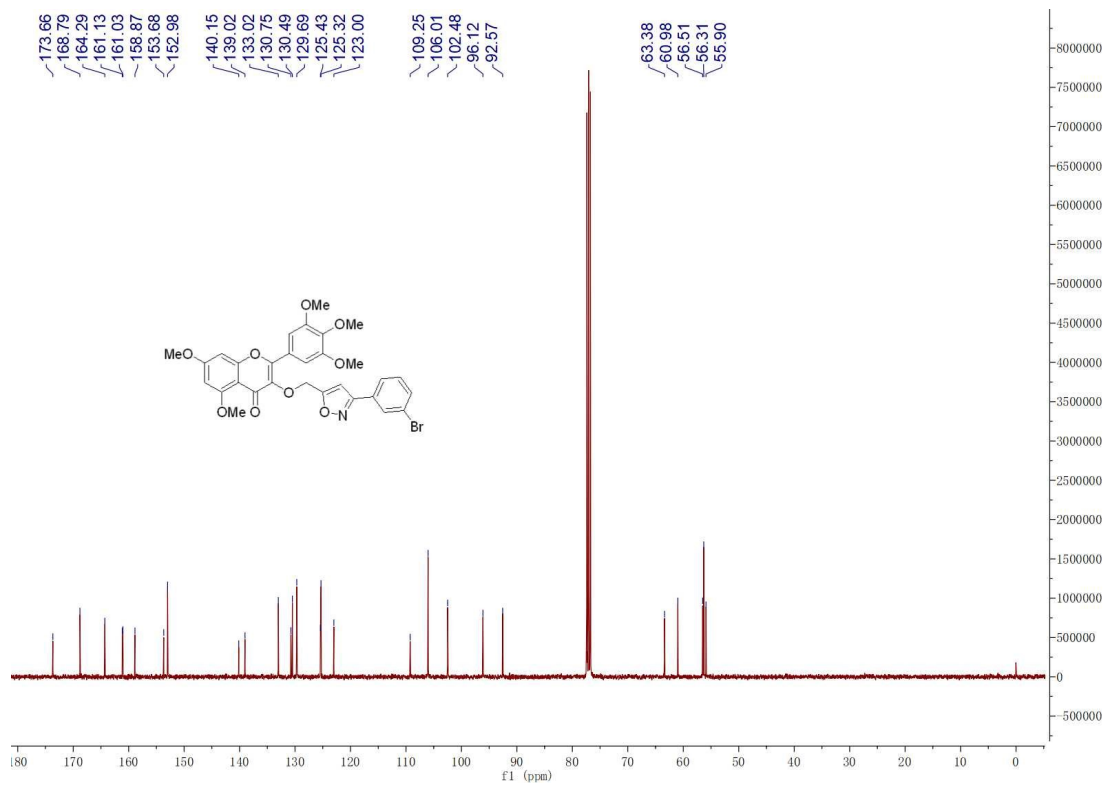

<sup>13</sup>C NMR spectra of compound Y14

28 #45 RT: 0.45 AV: 1 NL: 9.68E7  
 T: FTMS + p ESI Full ms [150.0000-2200.0000]

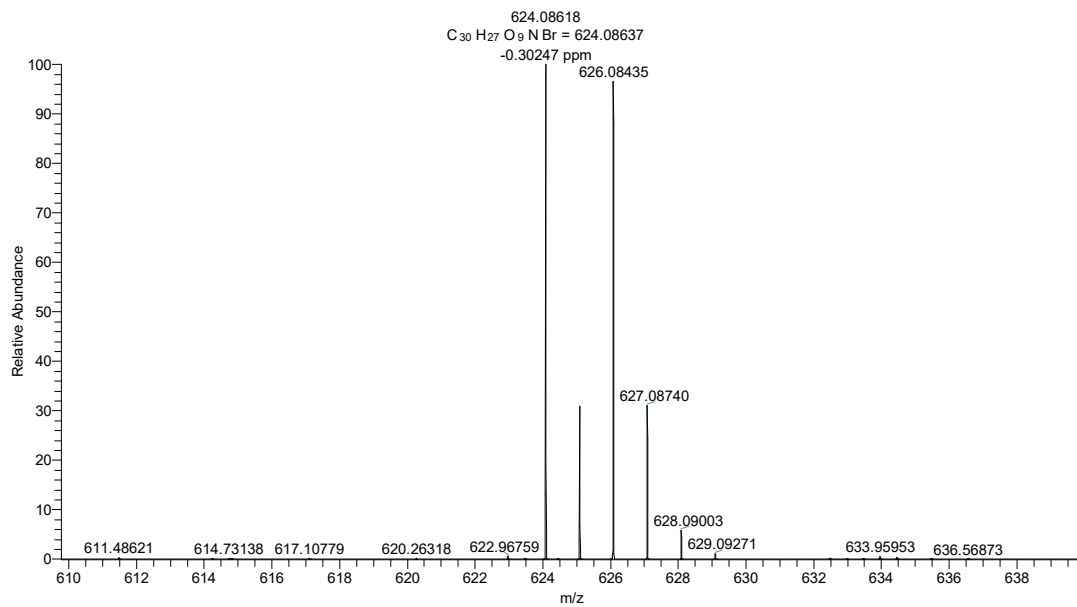

HRMS spectra of compound Y14

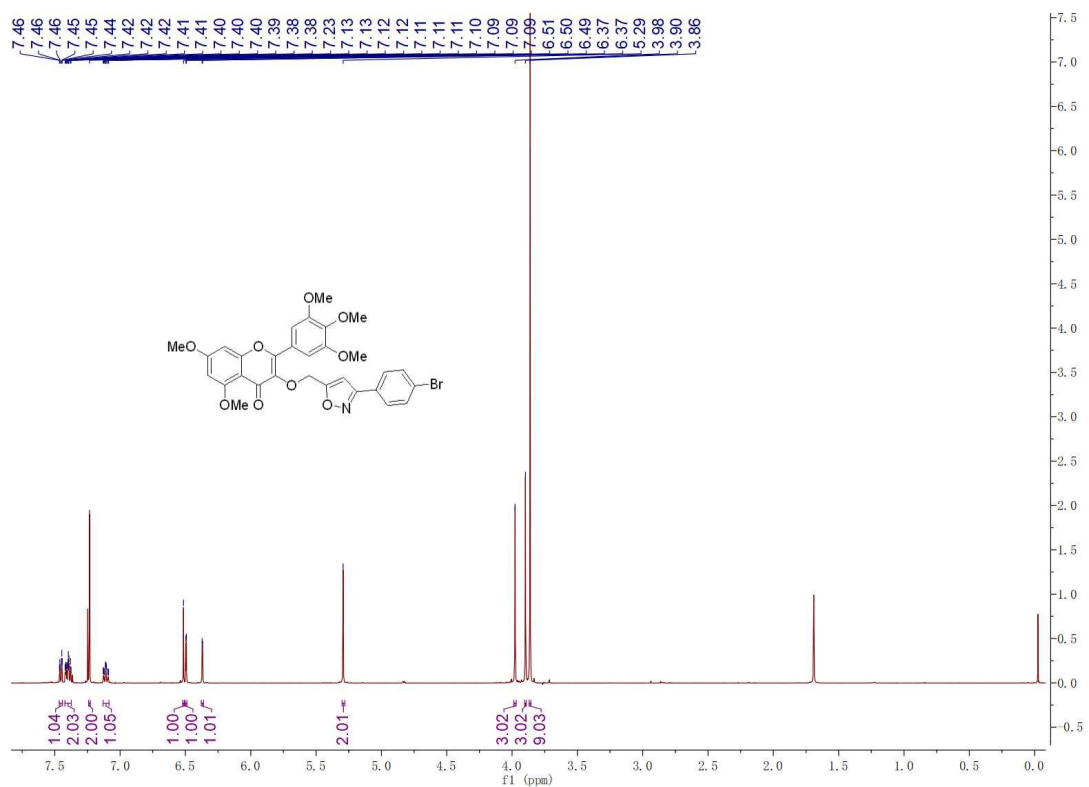

<sup>1</sup>H NMR spectra of compound Y15

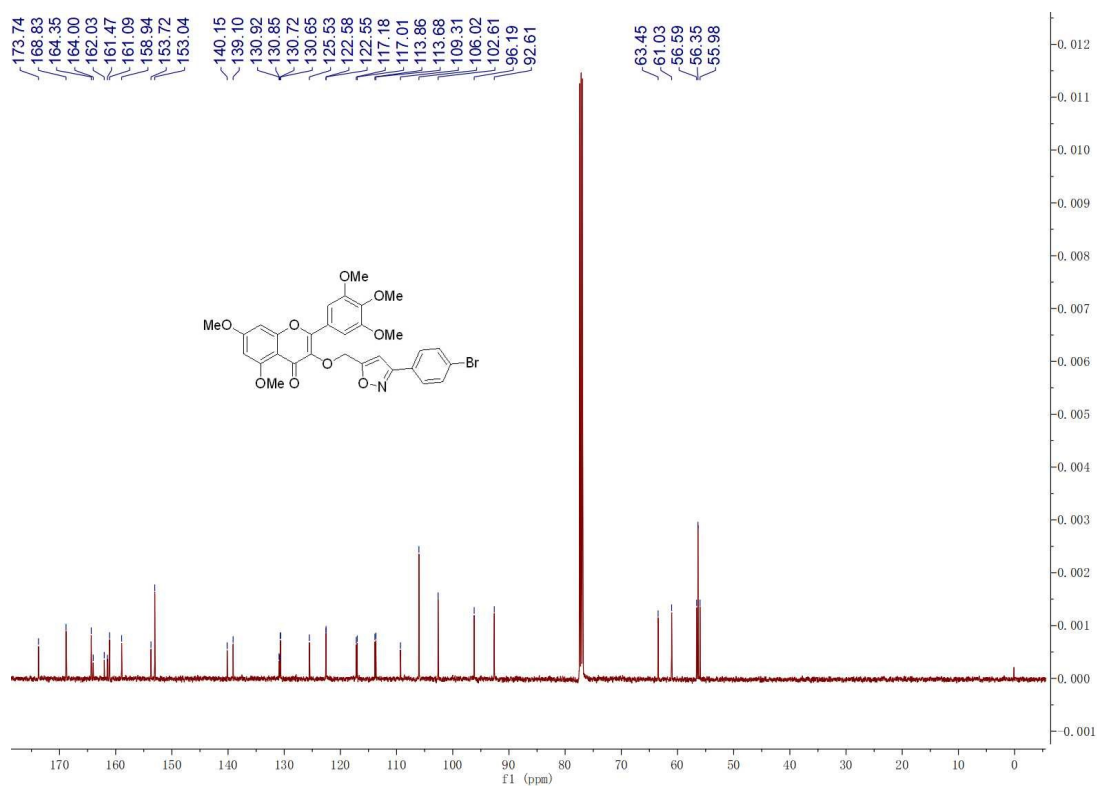

<sup>13</sup>C NMR spectra of compound Y15

29 #49 RT: 0.49 AV: 1 NL: 5.87E7  
T: FTMS + p ESI Full ms [150.0000-2200.0000]

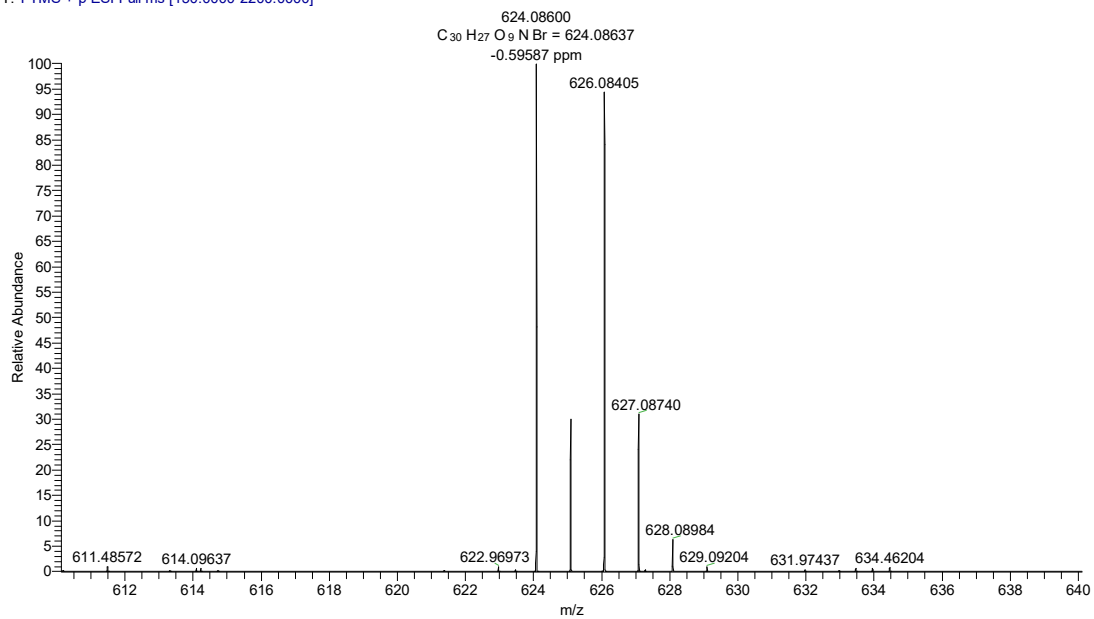

HRMS spectra of compound Y15

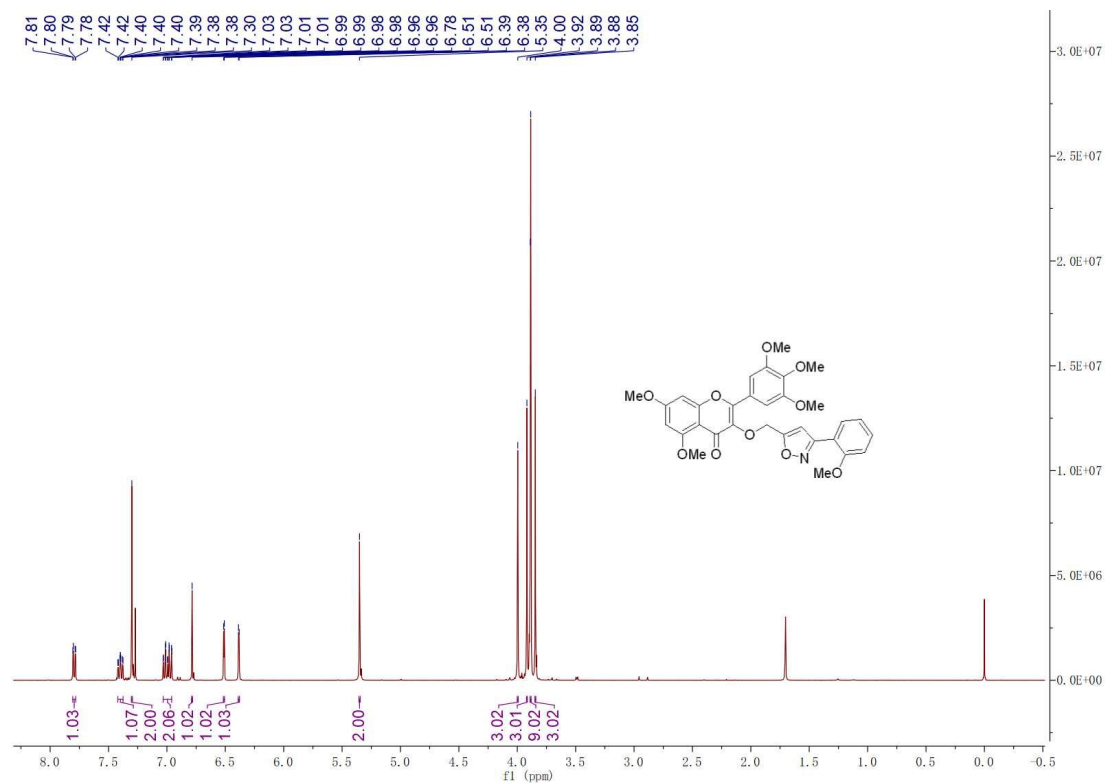

<sup>1</sup>H NMR spectra of compound Y16

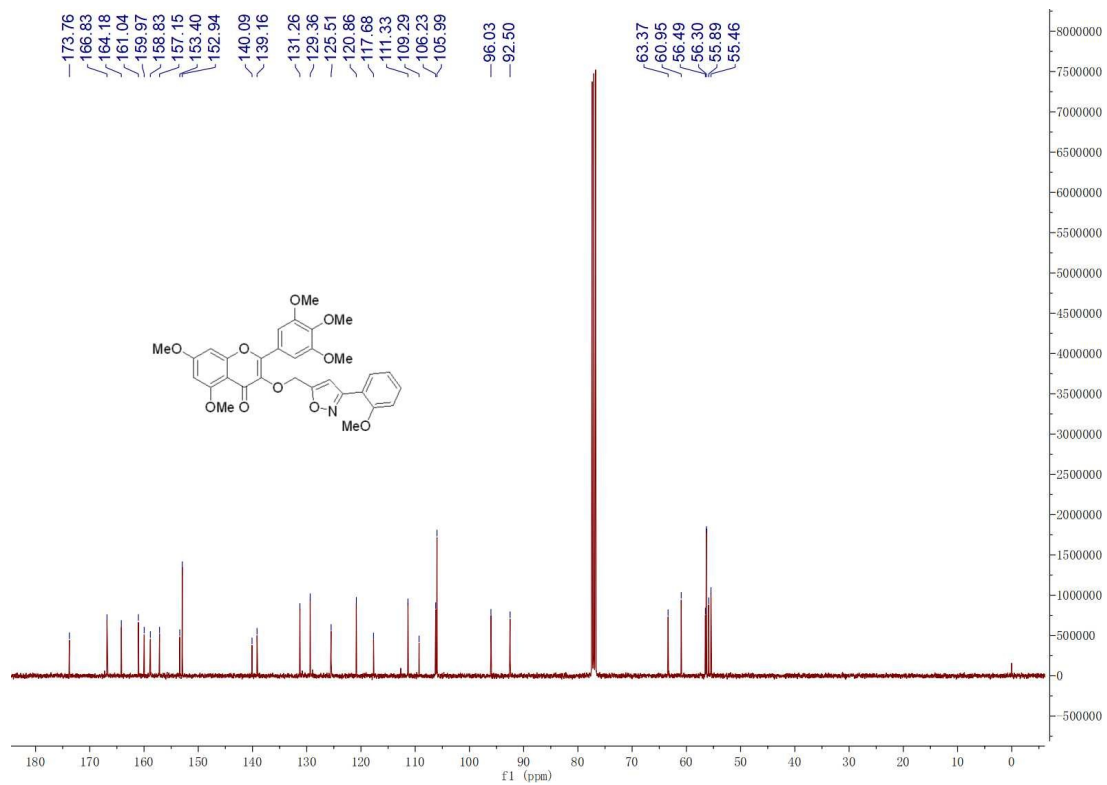

<sup>13</sup>C NMR spectra of compound Y16

30 #35 RT: 0.35 AV: 1 NL: 7.64E7  
 T: FTMS + p ESI Full ms [150.0000-2200.0000]

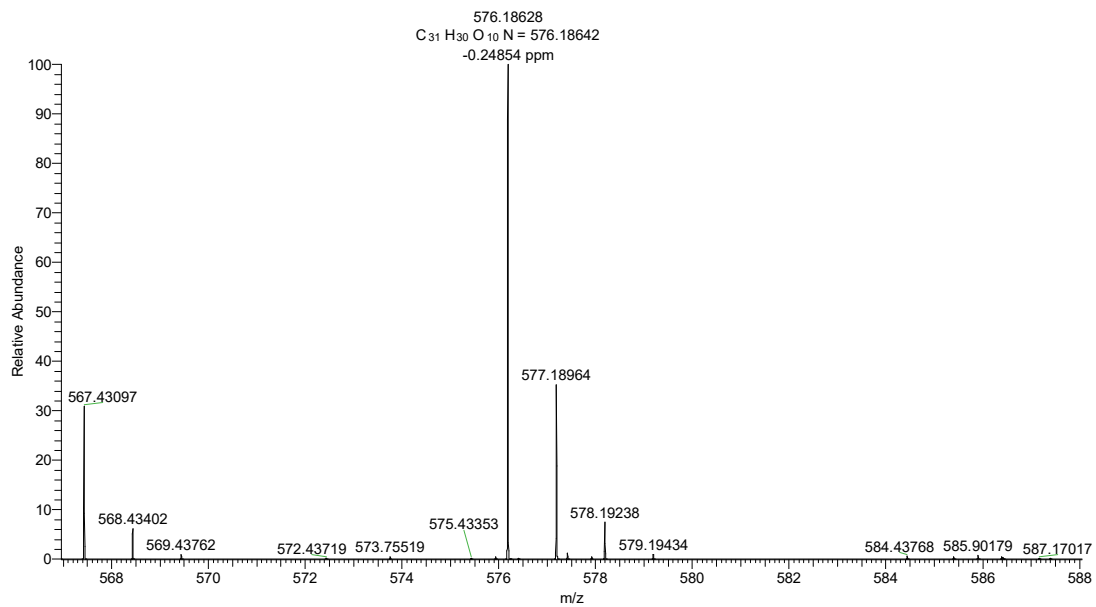

HRMS spectra of compound Y16

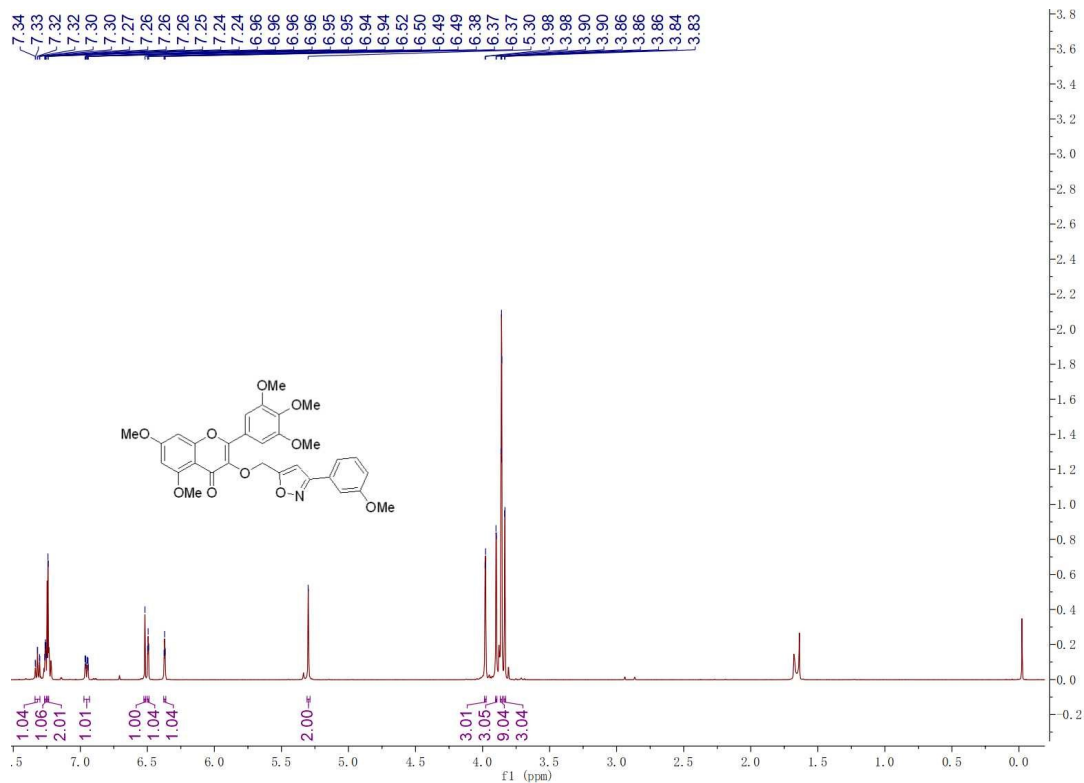

<sup>1</sup>H NMR spectra of compound Y17

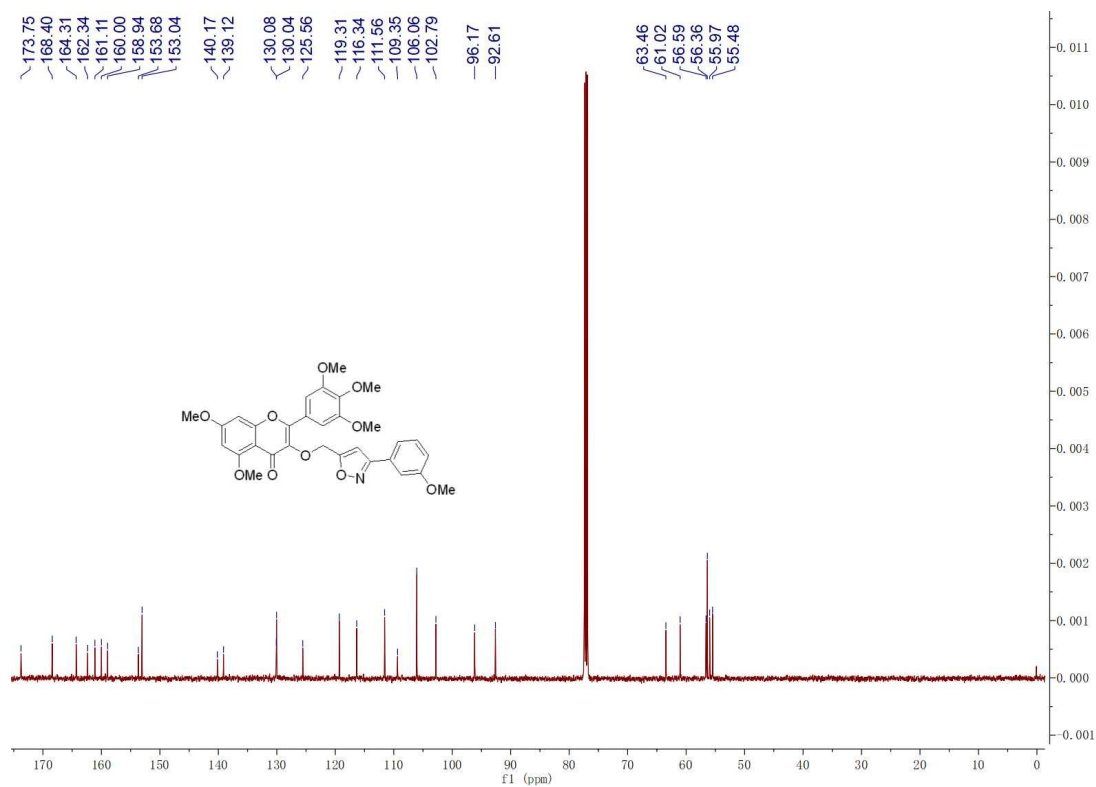

<sup>13</sup>C NMR spectra of compound Y17

31 #39 RT: 0.39 AV: 1 NL: 5.76E8  
T: FTMS + p ESI Full ms [150.0000-2200.0000]

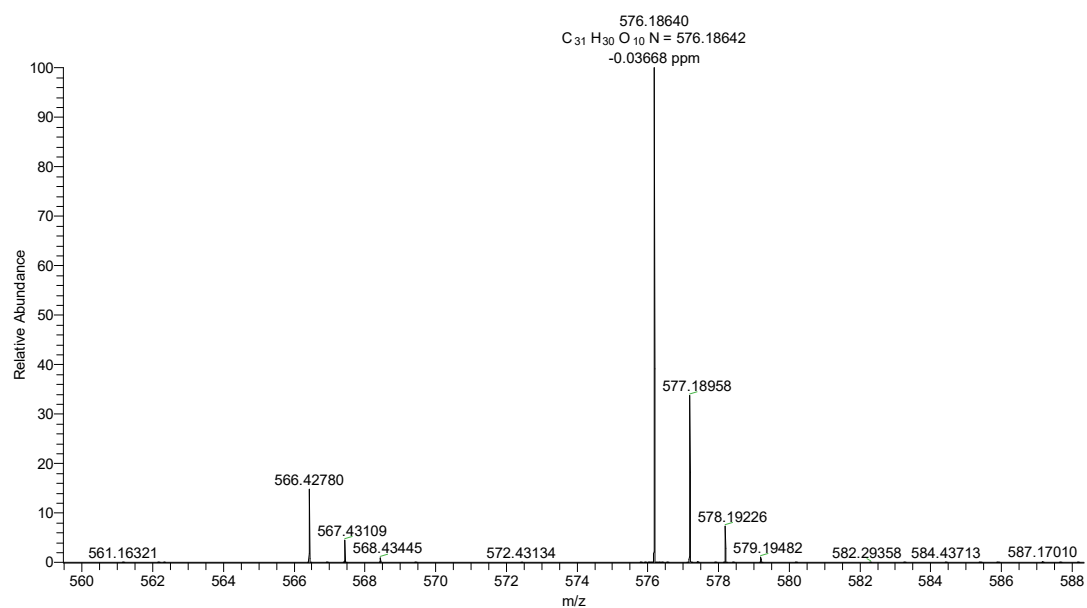

HRMS spectra of compound Y17

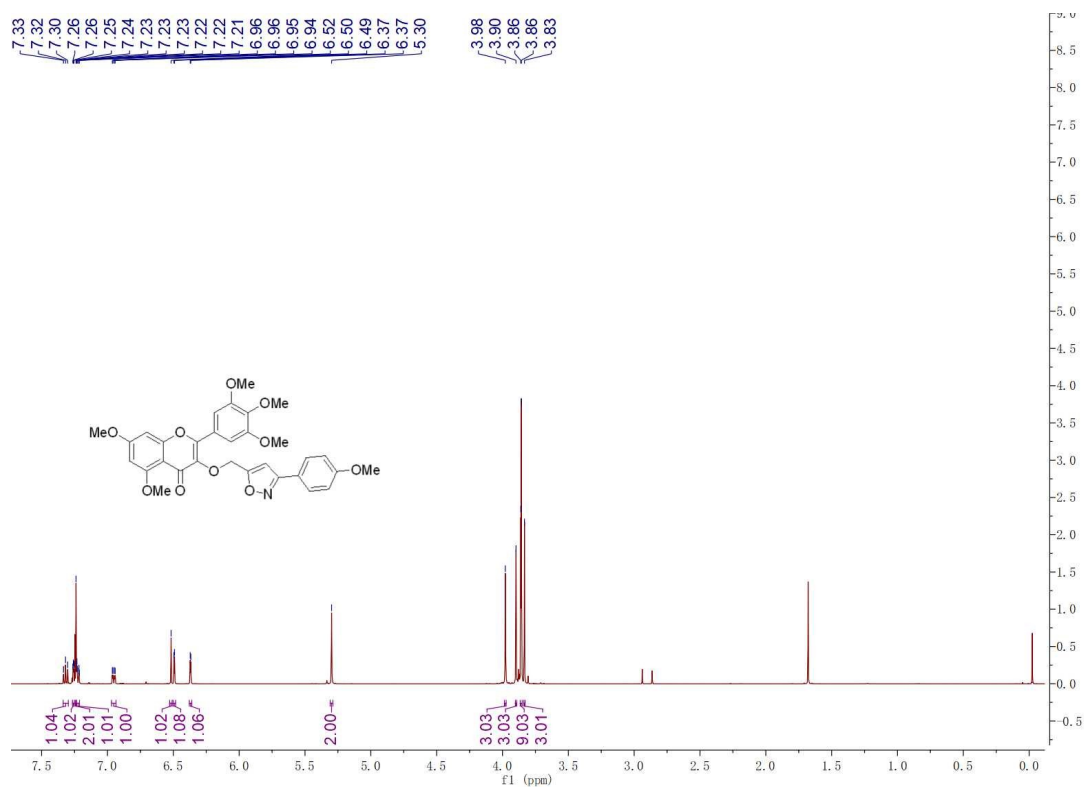

<sup>1</sup>H NMR spectra of compound Y18



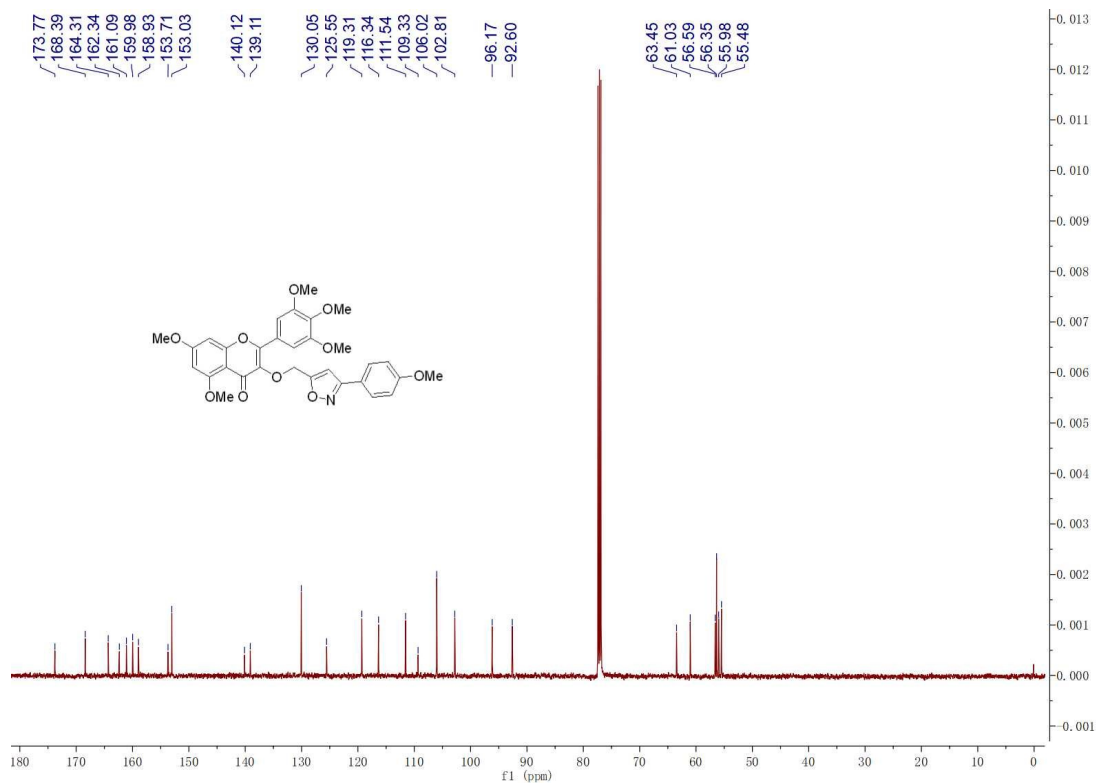

$^{13}\text{C}$  NMR spectra of compound Y18

32 #43 RT: 0.43 AV: 1 NL: 2.49E6  
T: FTMS + p ESI Full ms [150.0000-2200.0000]

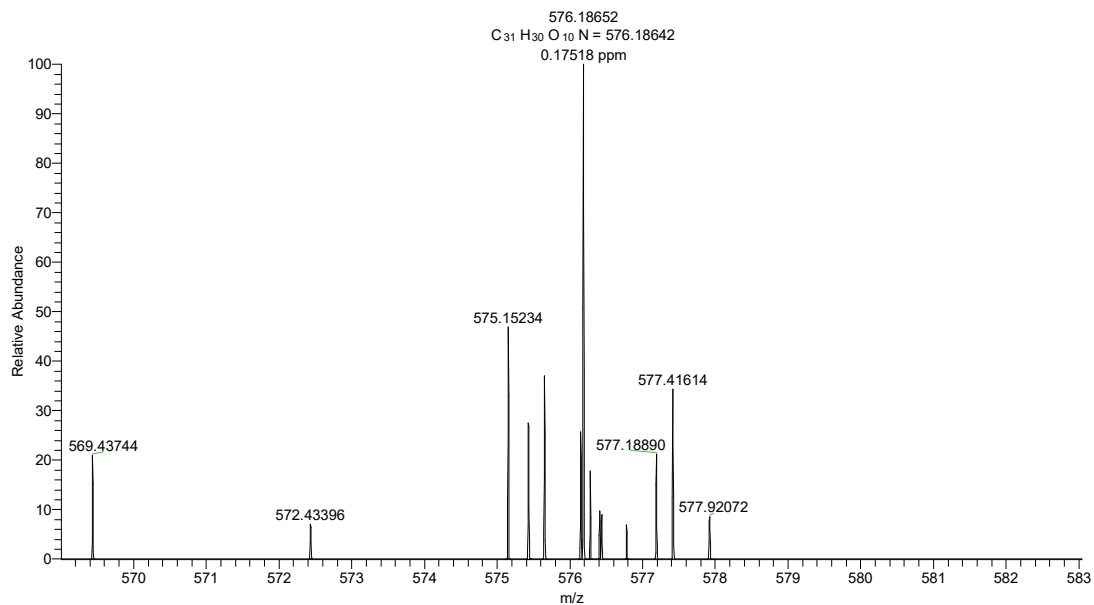

HRMS spectra of compound Y18

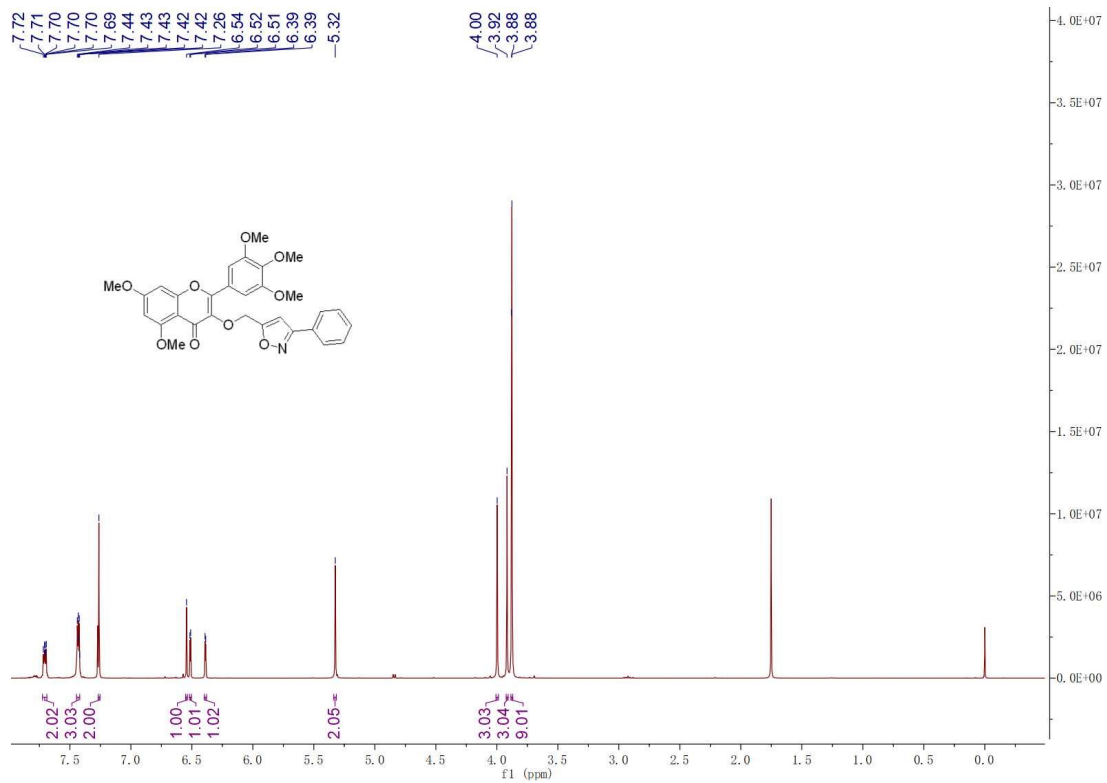

<sup>1</sup>H NMR spectra of compound Y19

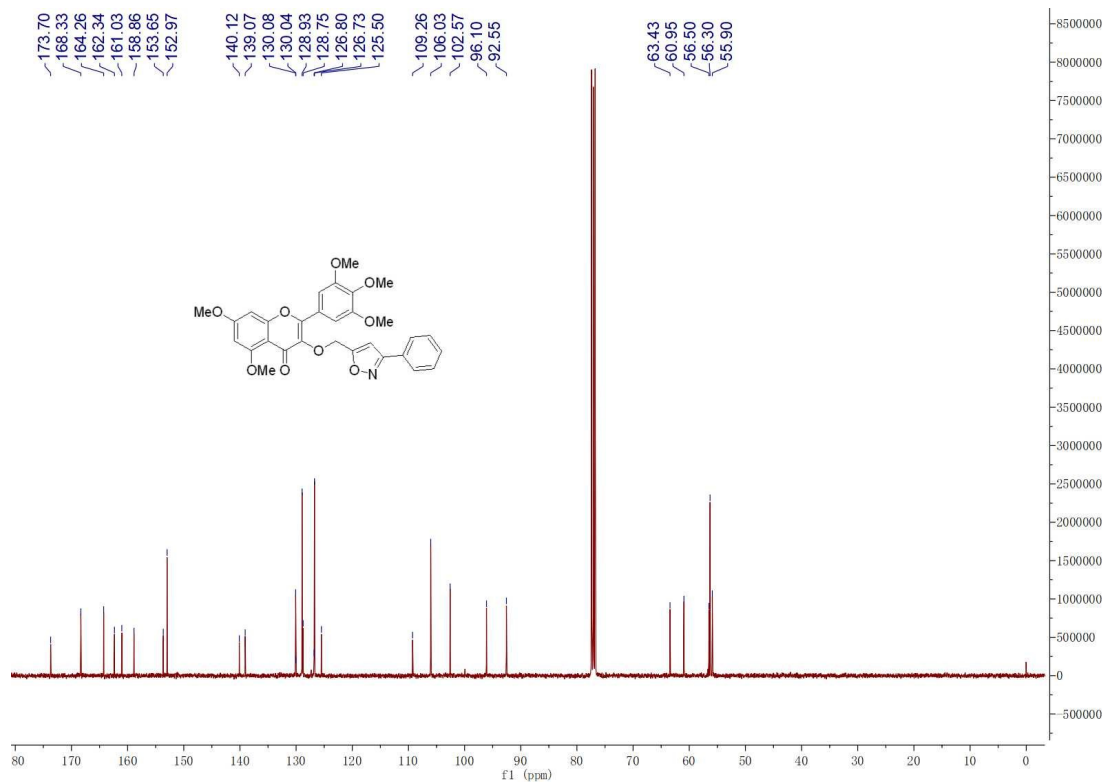

<sup>13</sup>C NMR spectra of compound Y19

33 #49 RT: 0.49 AV: 1 NL: 3.10E8  
T: FTMS + p ESI Full ms [150.0000-2200.0000]

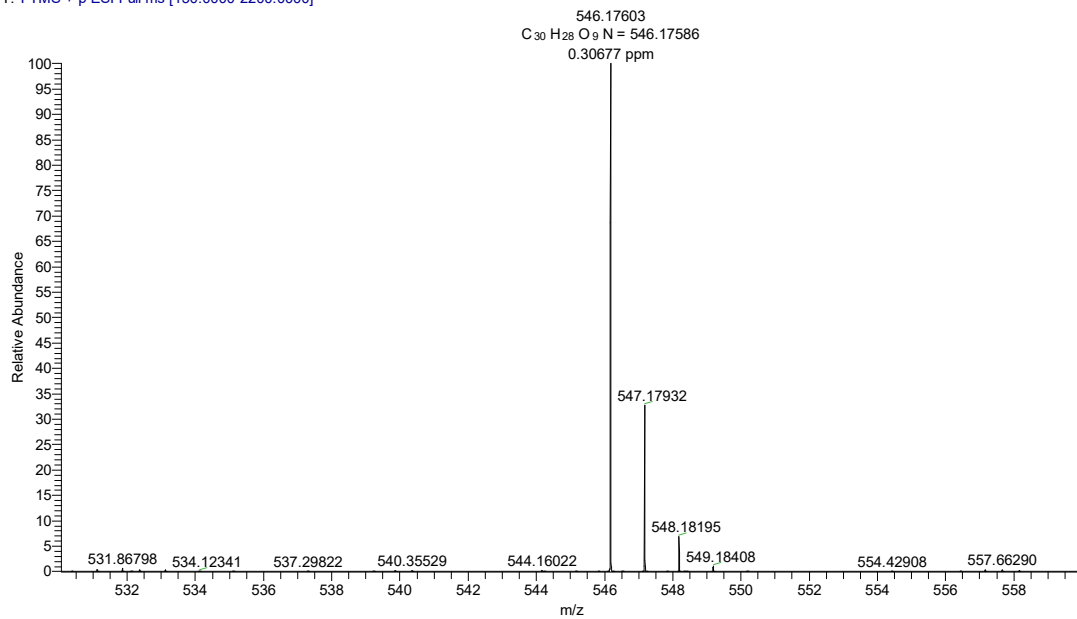

HRMS spectra of compound Y19

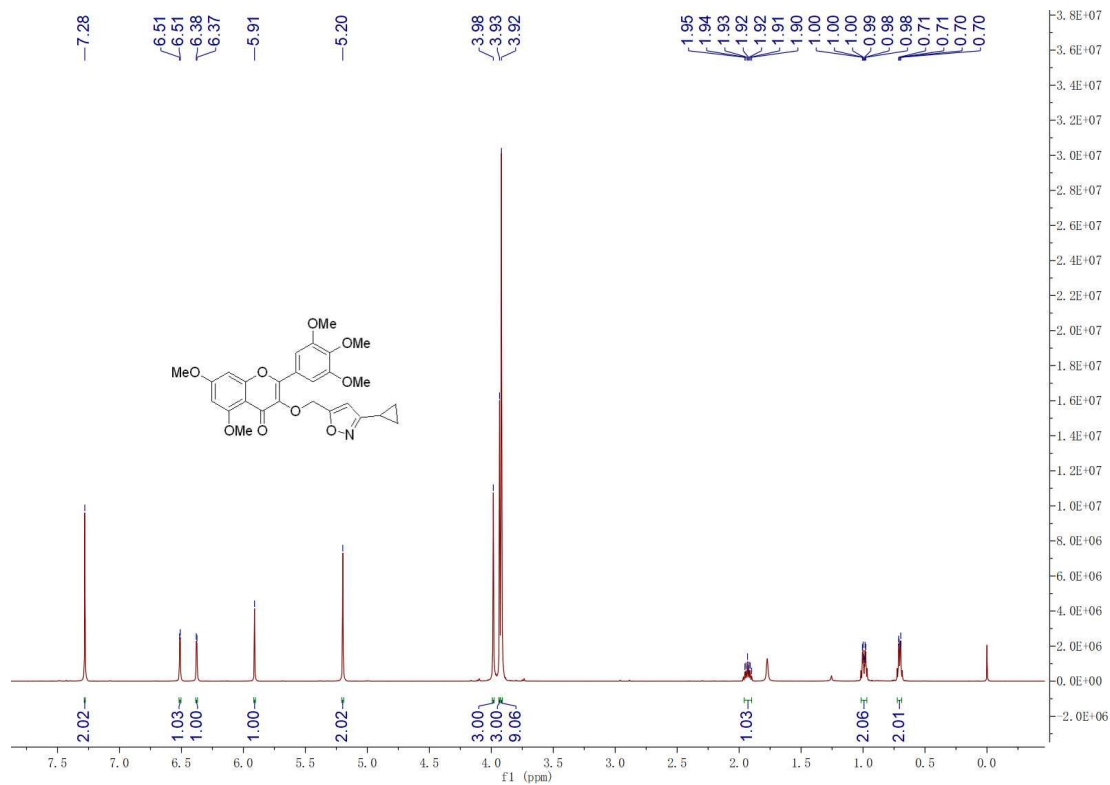

<sup>1</sup>H NMR spectra of compound Y20

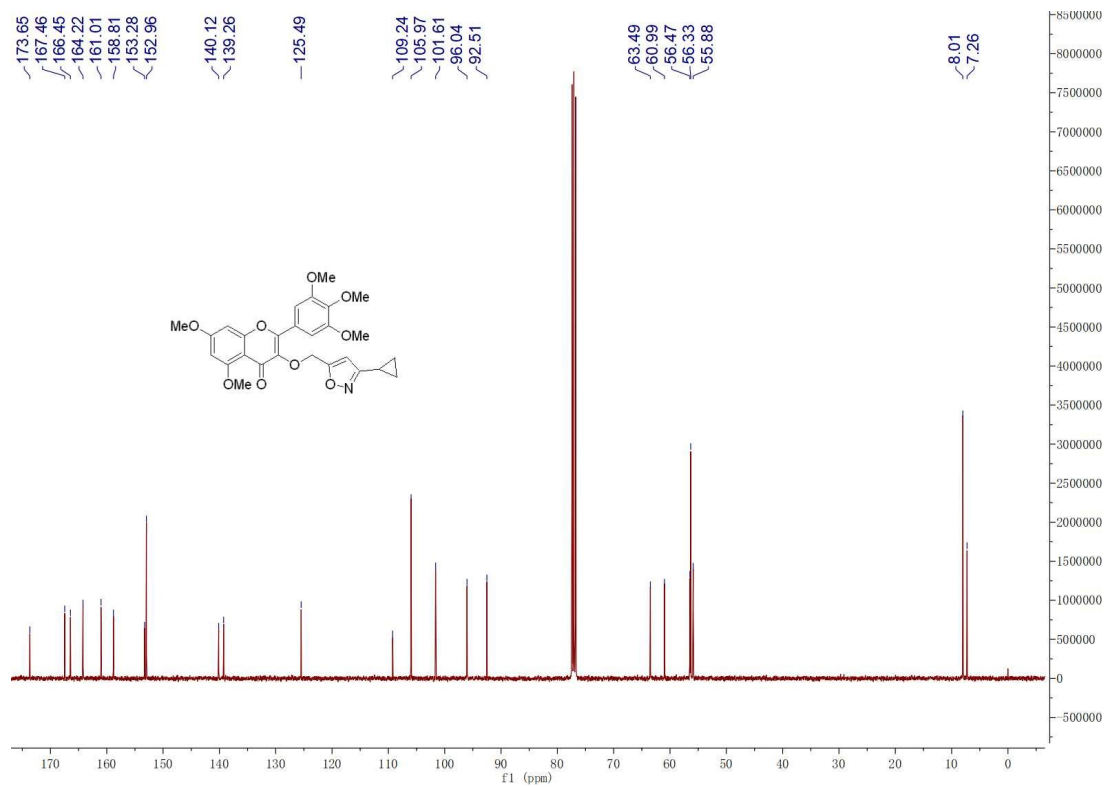

<sup>13</sup>C NMR spectra of compound Y20

56 #31 RT: 0.31 AV: 1 NL: 2.43E7  
 T: FTMS + p ESI Full ms [150.0000-2200.0000]

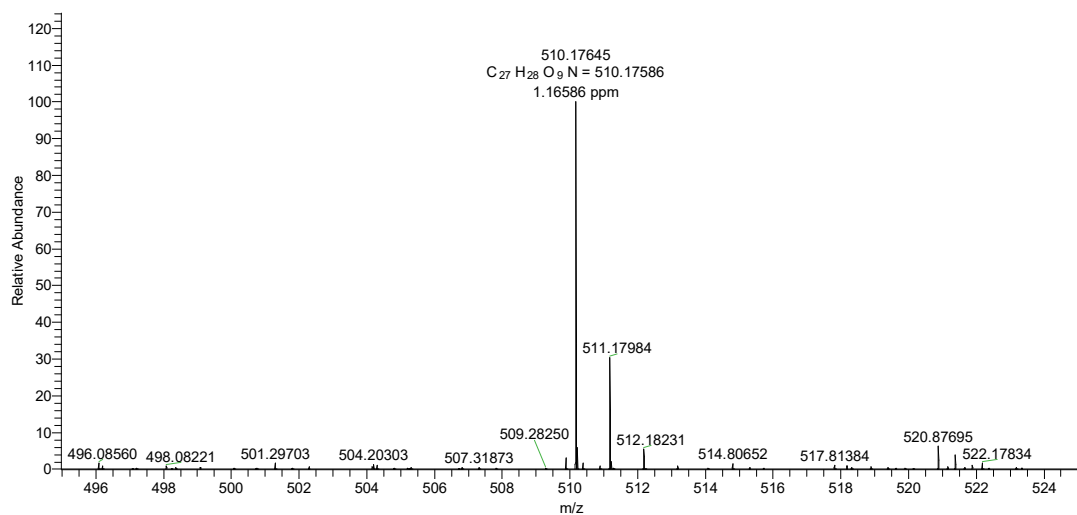

HRMS spectra of compound Y20

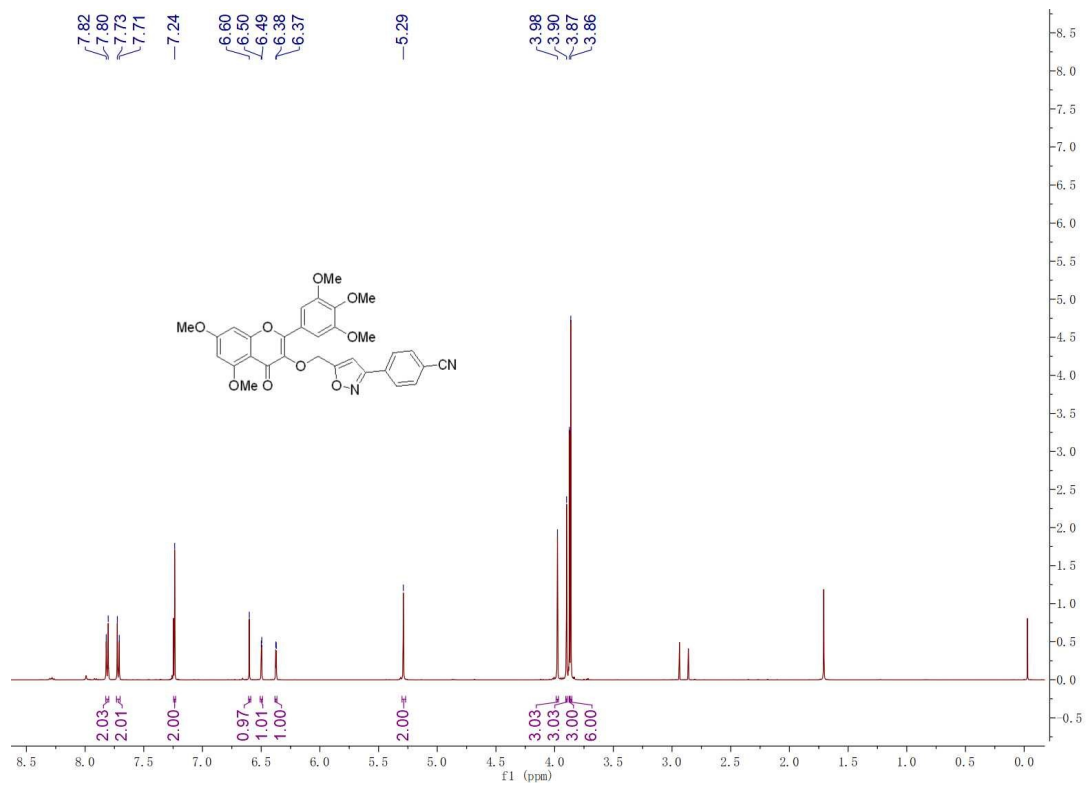

<sup>1</sup>H NMR spectra of compound Y21

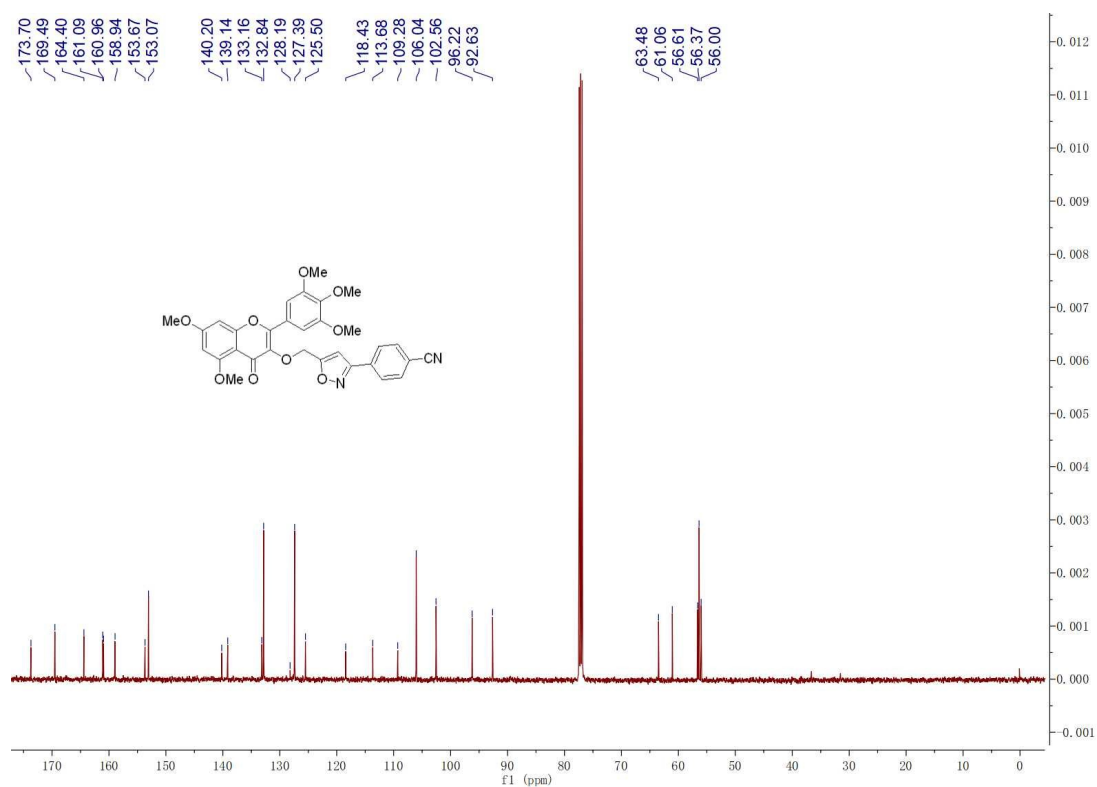

<sup>13</sup>C NMR spectra of compound Y21

35 #37 RT: 0.37 AV: 1 NL: 5.45E5  
T: FTMS + p ESI Full ms [150.0000-2200.0000]

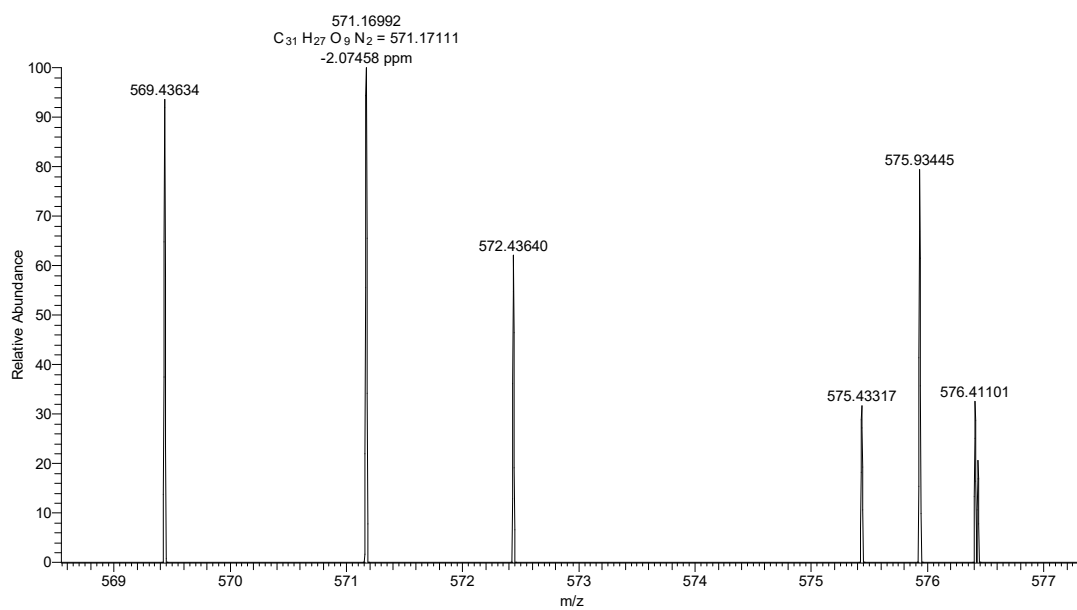

HRMS spectra of compound Y21

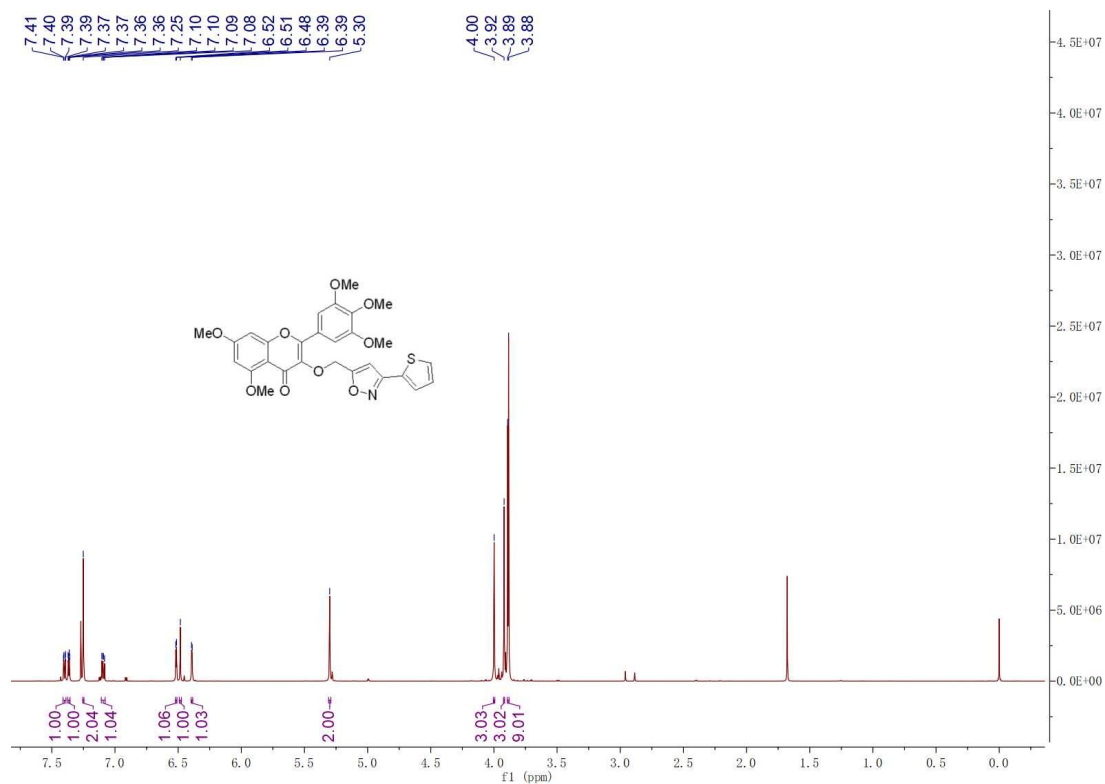

<sup>1</sup>H NMR spectra of compound Y22

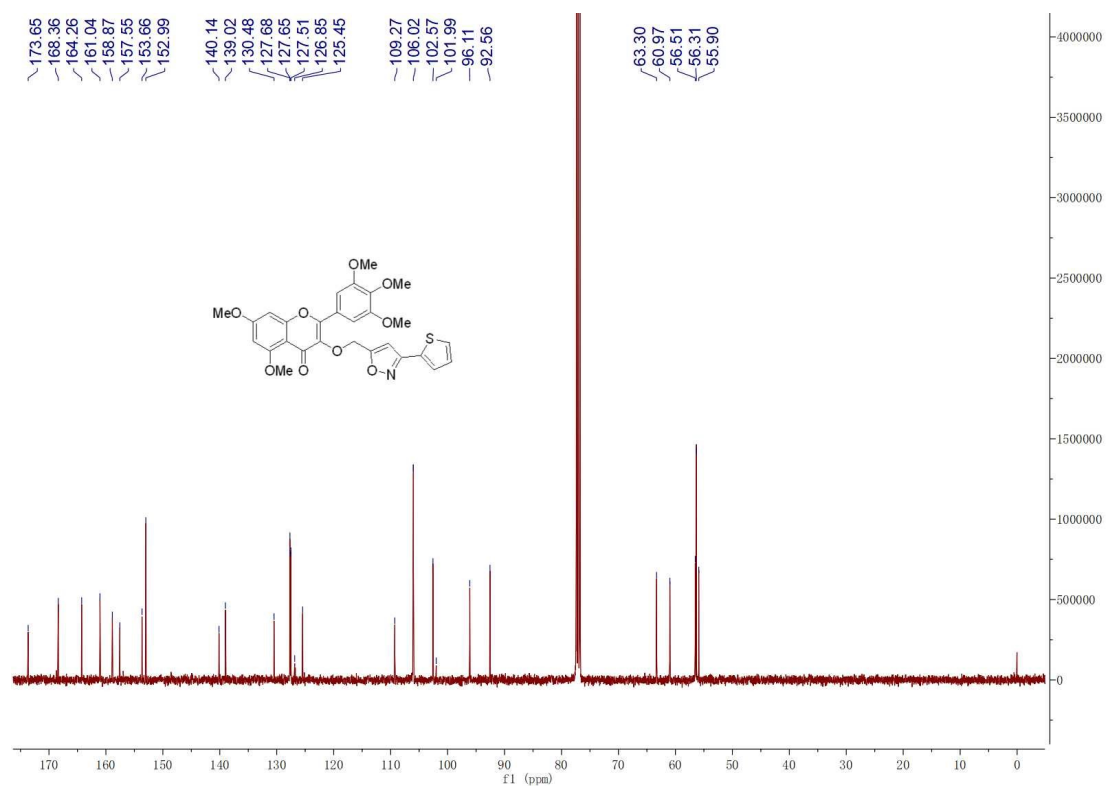

<sup>13</sup>C NMR spectra of compound Y22

36 #33 RT: 0.34 AV: 1 NL: 1.15E8  
T: FTMS + p ESI Full ms [150.0000-2200.0000]

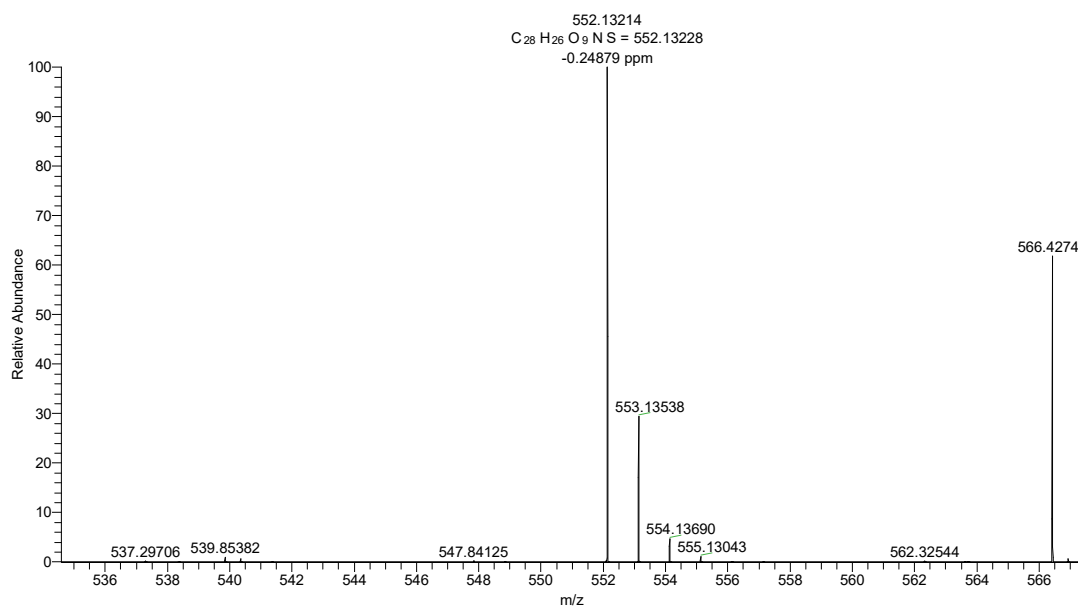

HRMS spectra of compound Y22

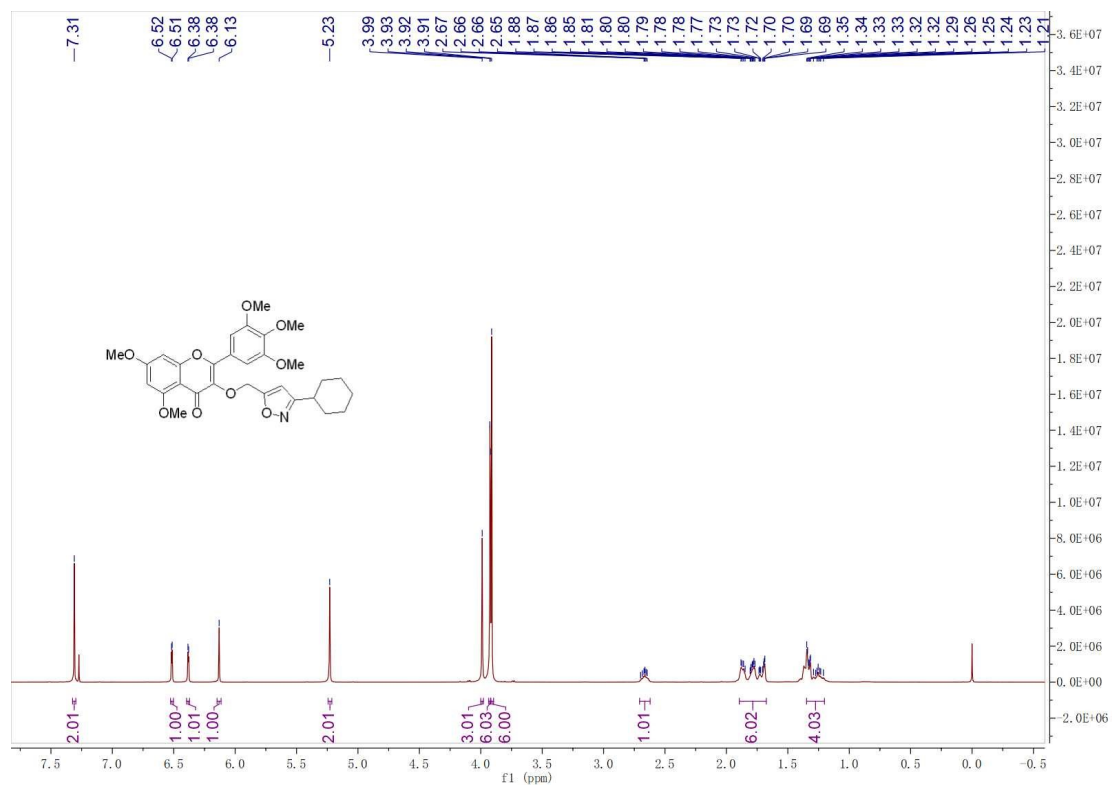

<sup>1</sup>H NMR spectra of compound Y23

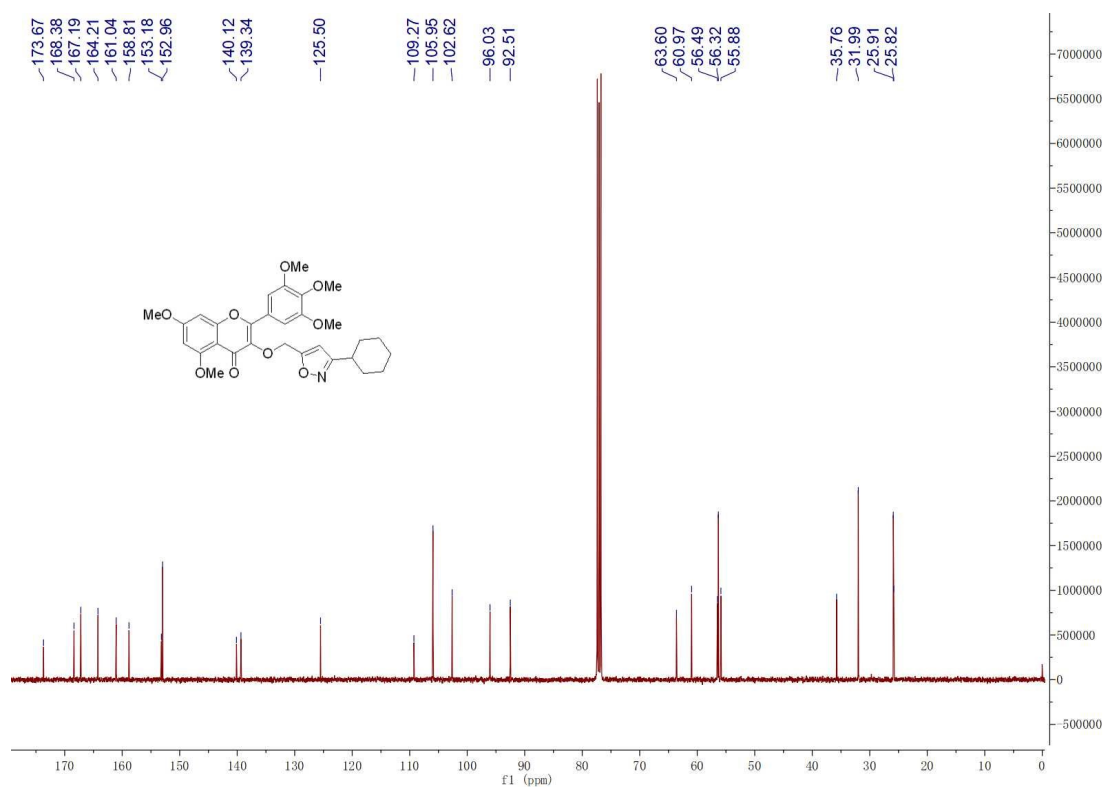

<sup>13</sup>C NMR spectra of compound Y23



59 #41 RT: 0.41 AV: 1 NL: 1.30E8  
T: FTMS + p ESI Full ms [150.0000-2200.0000]

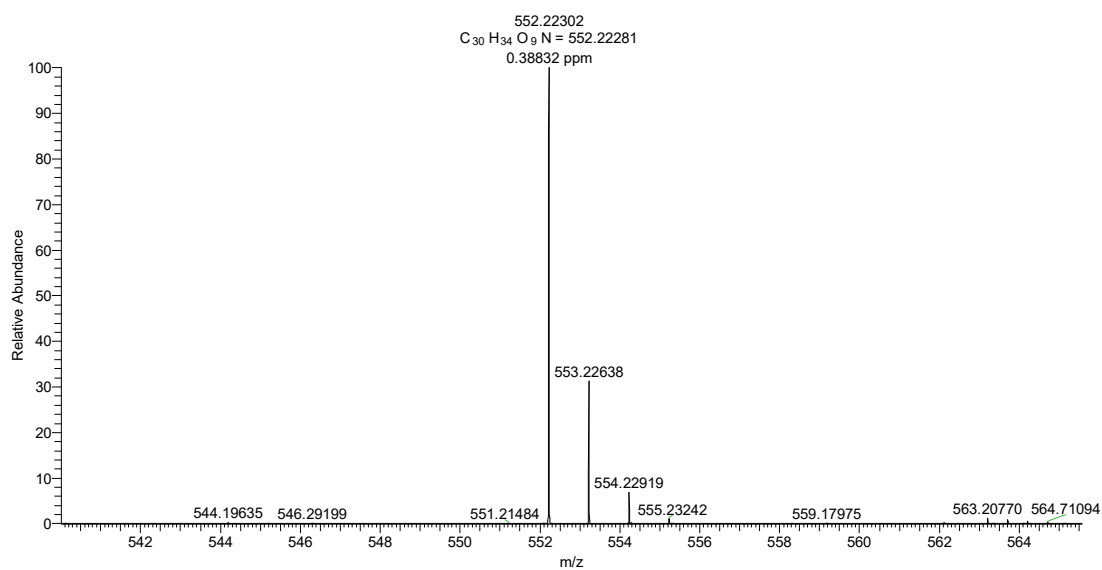

HRMS spectra of compound Y23

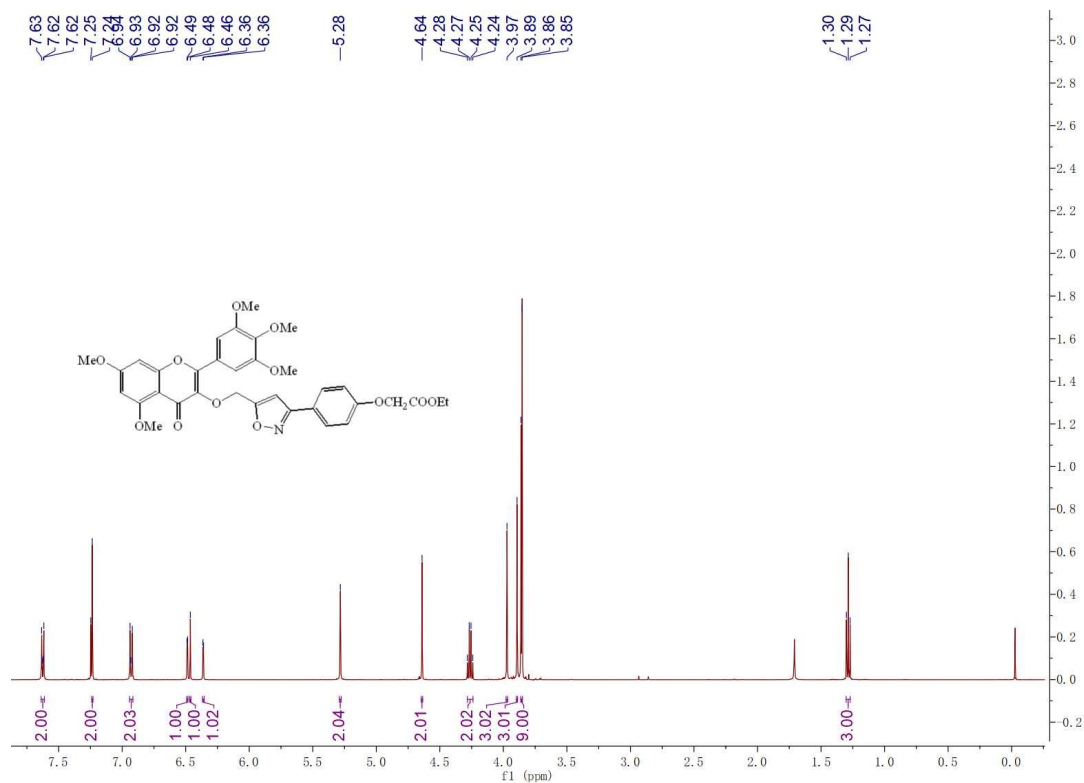

<sup>1</sup>H NMR spectra of compound Y24

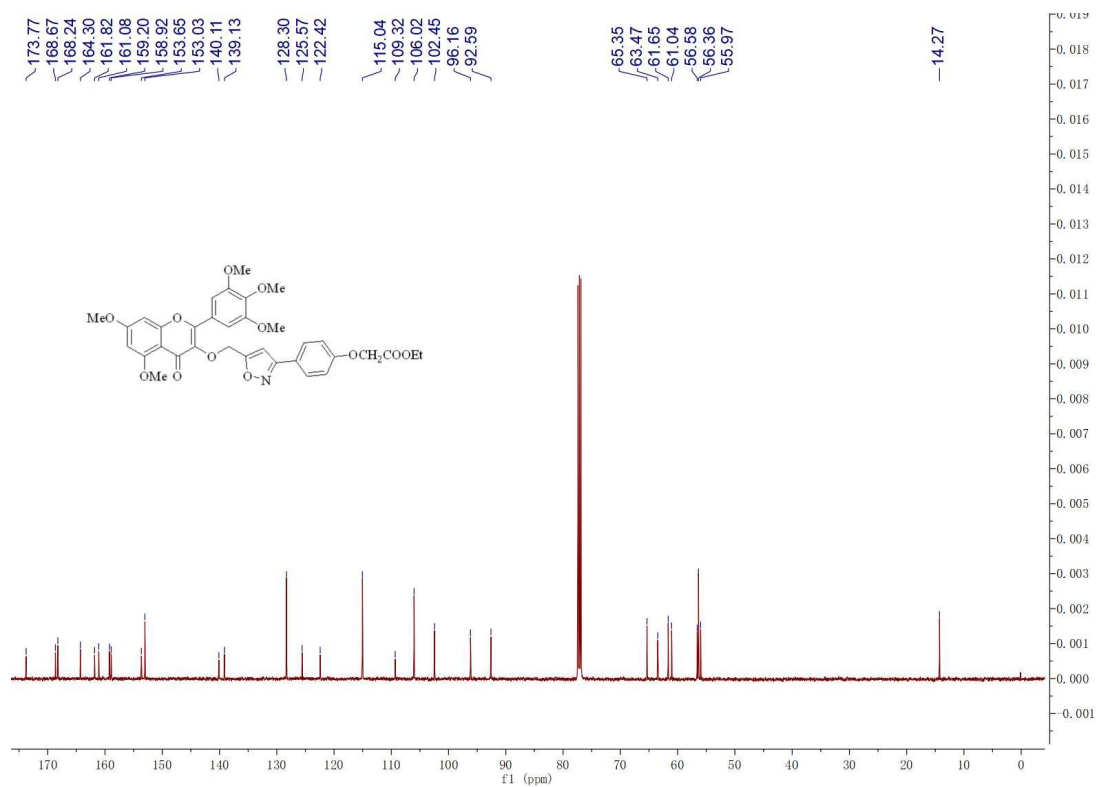

<sup>13</sup>C NMR spectra of compound Y24

37 #33 RT: 0.34 AV: 1 NL: 2.88E8  
 T: FTMS + p ESI Full ms [150.0000-2200.0000]

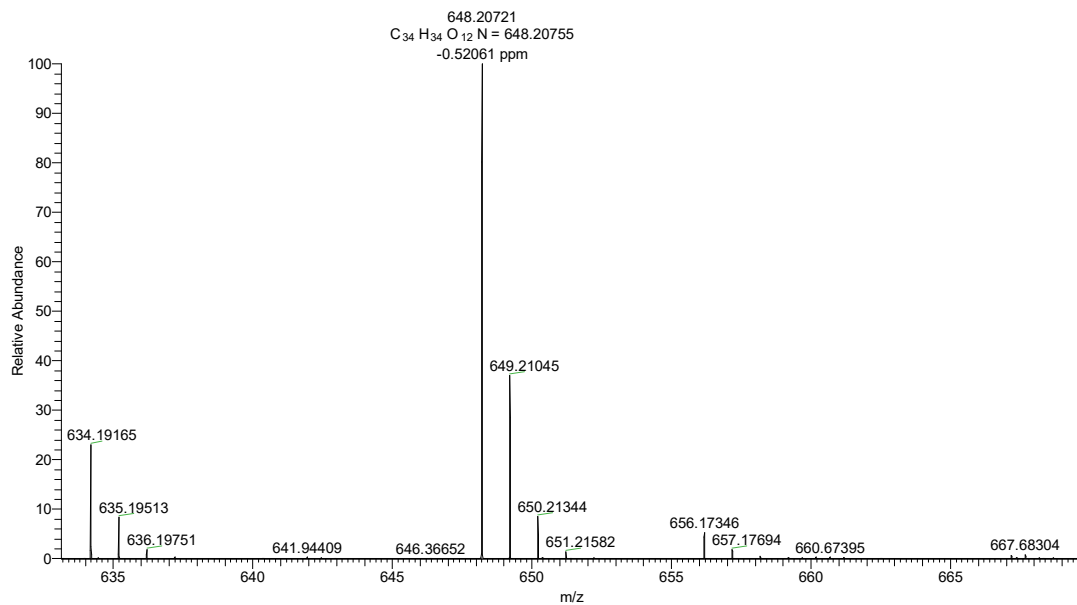

HRMS spectra of compound Y24

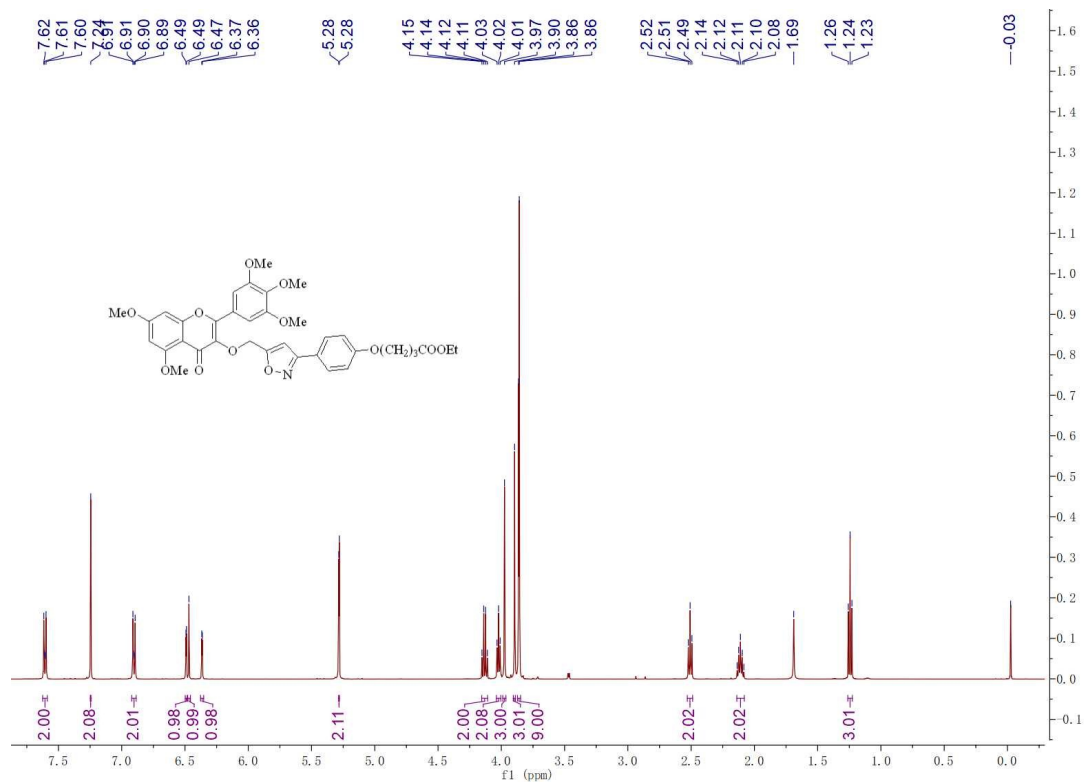

<sup>1</sup>H NMR spectra of compound Y25

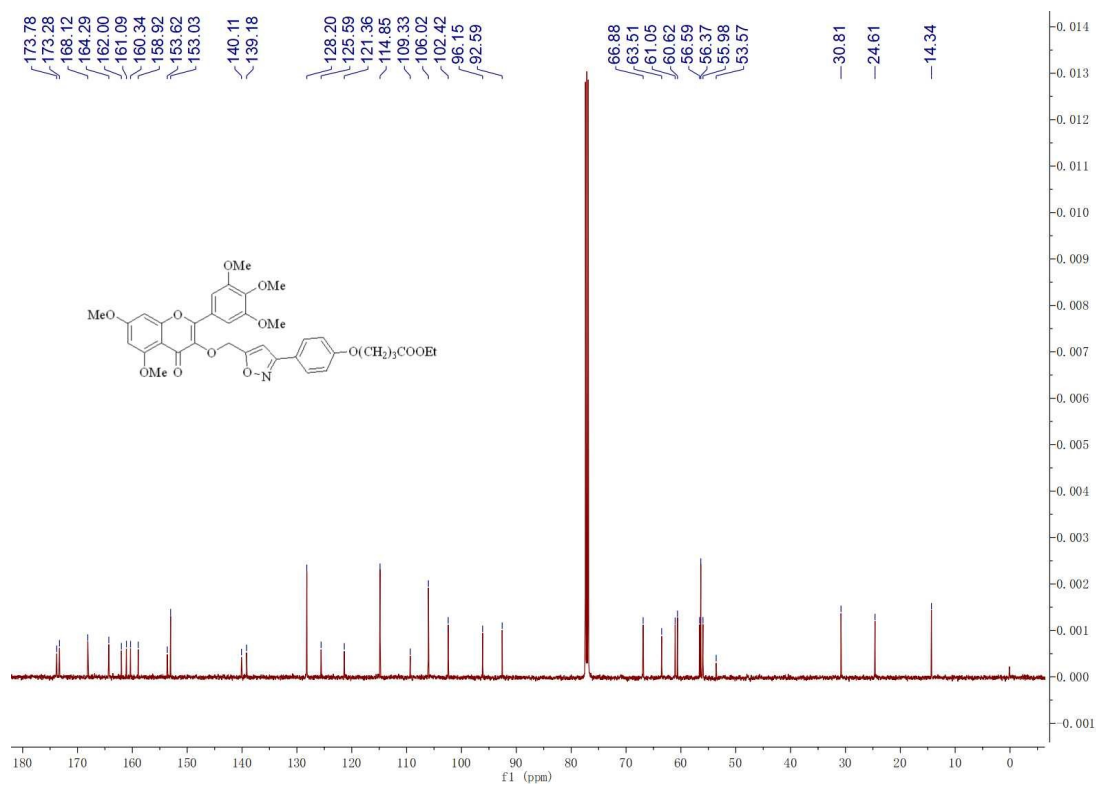

<sup>13</sup>C NMR spectra of compound Y25

38 #41 RT: 0.41 AV: 1 NL: 5.96E8  
T: FTMS + p ESI Full ms [150.0000-2200.0000]

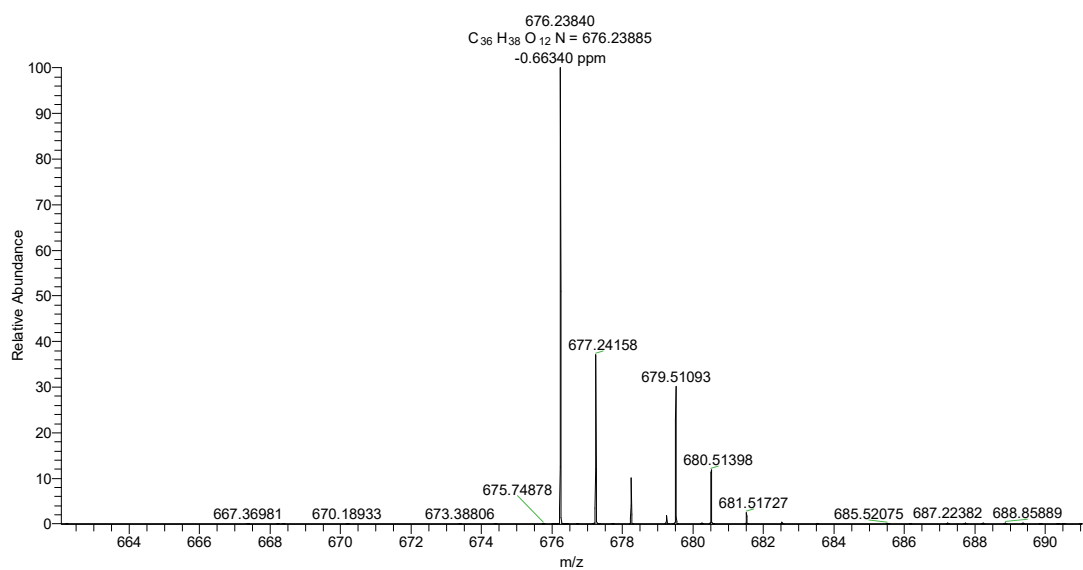

HRMS spectra of compound Y25

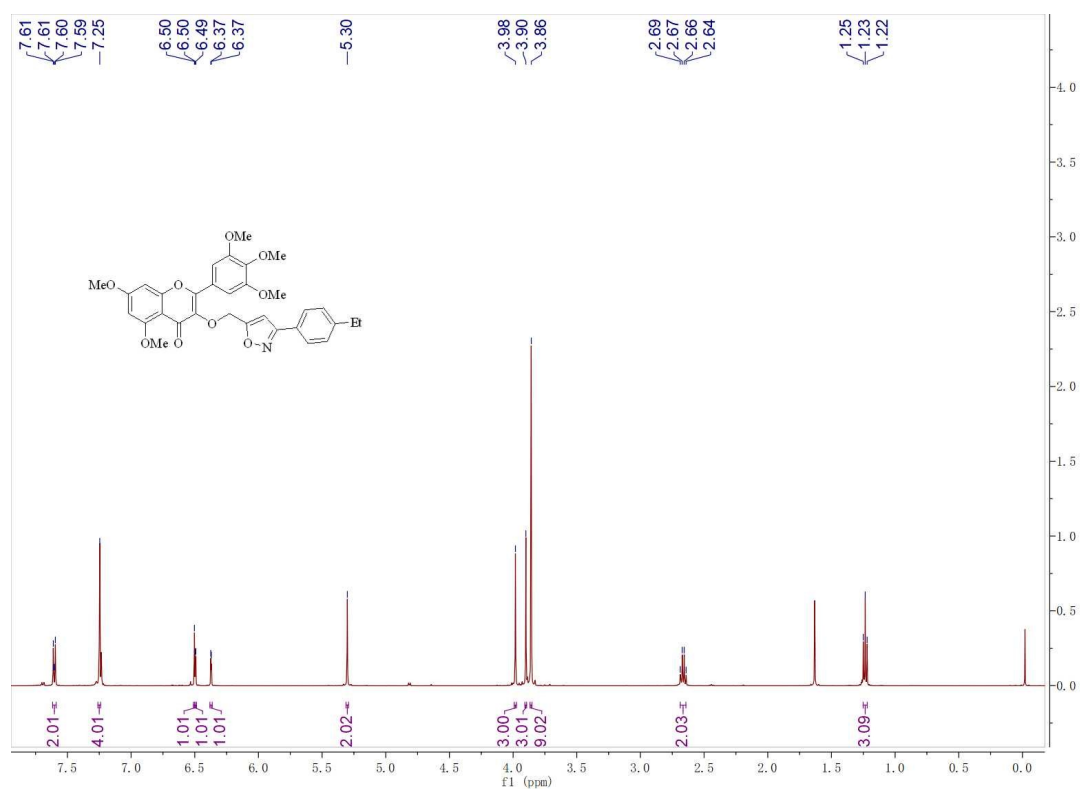

<sup>1</sup>H NMR spectra of compound Y26

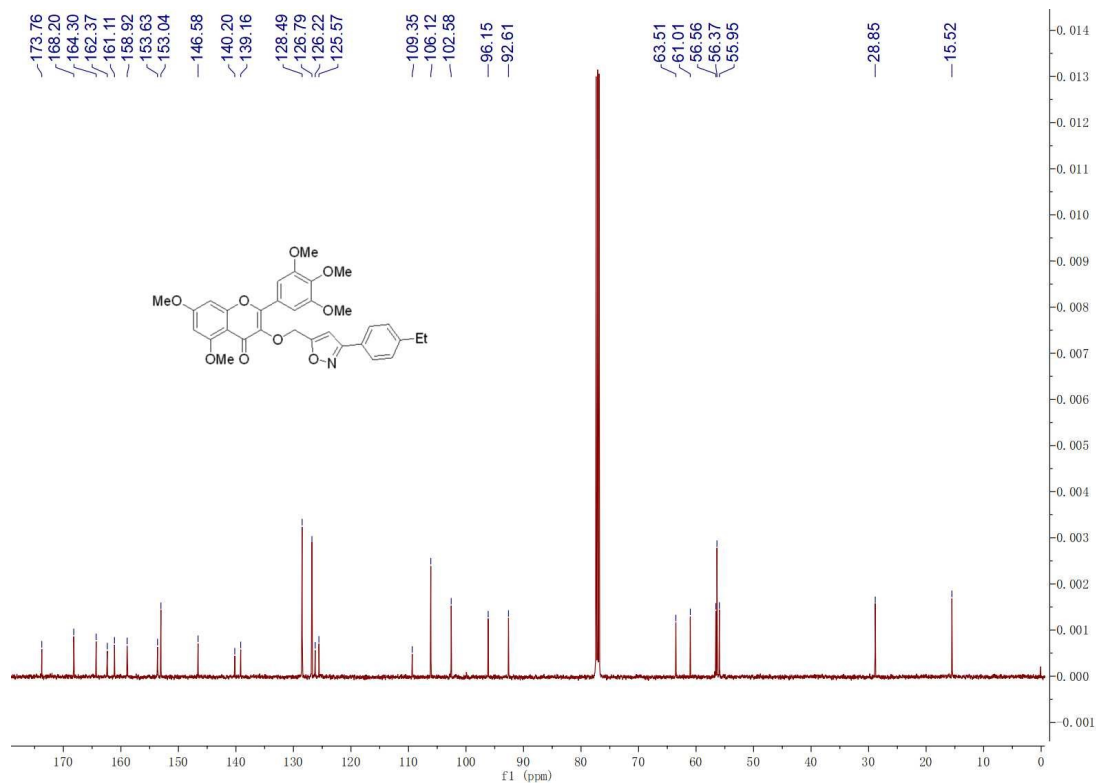

$^{13}\text{C}$  NMR spectra of compound Y26

23 #55 RT: 0.53 AV: 1 NL: 3.27E7  
T: FTMS + p ESI Full ms [100.0000-1300.0000]

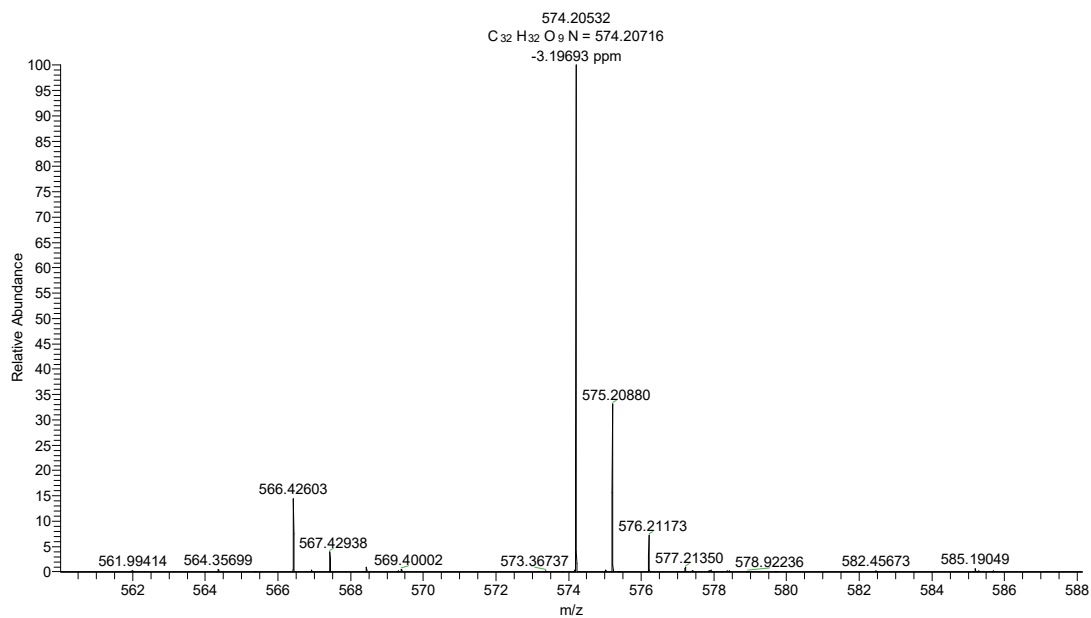

HRMS spectra of compound Y26

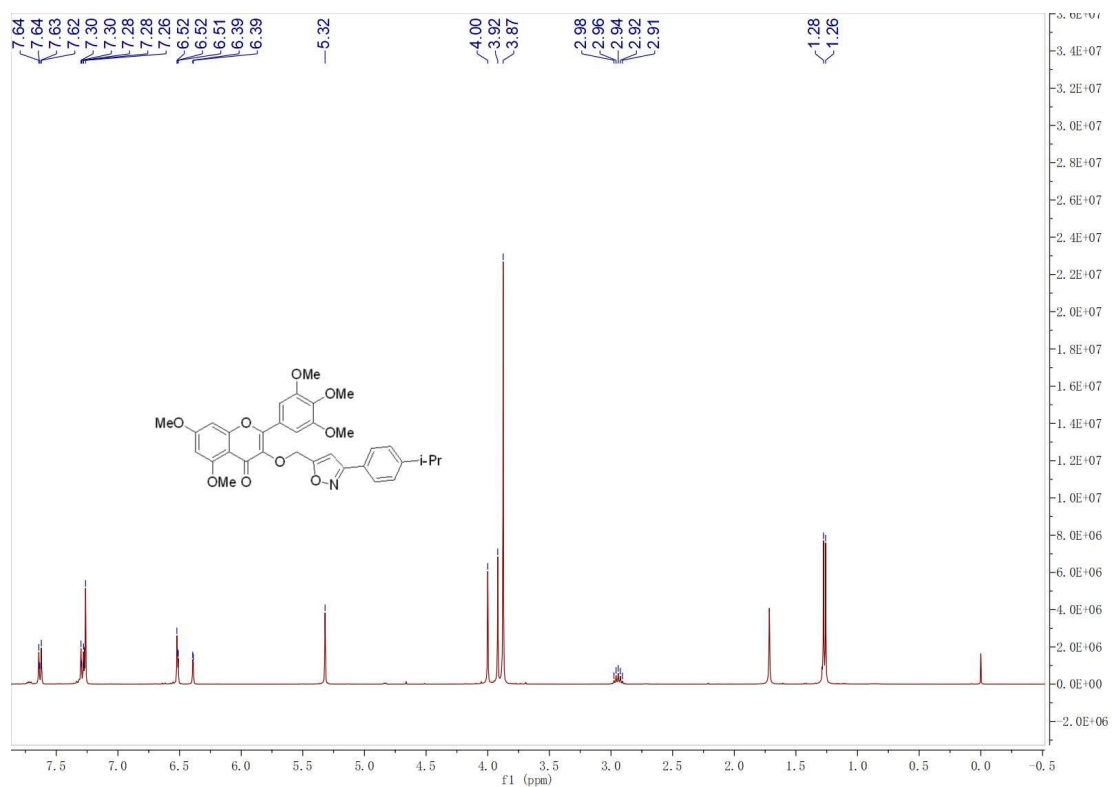

<sup>1</sup>H NMR spectra of compound Y27

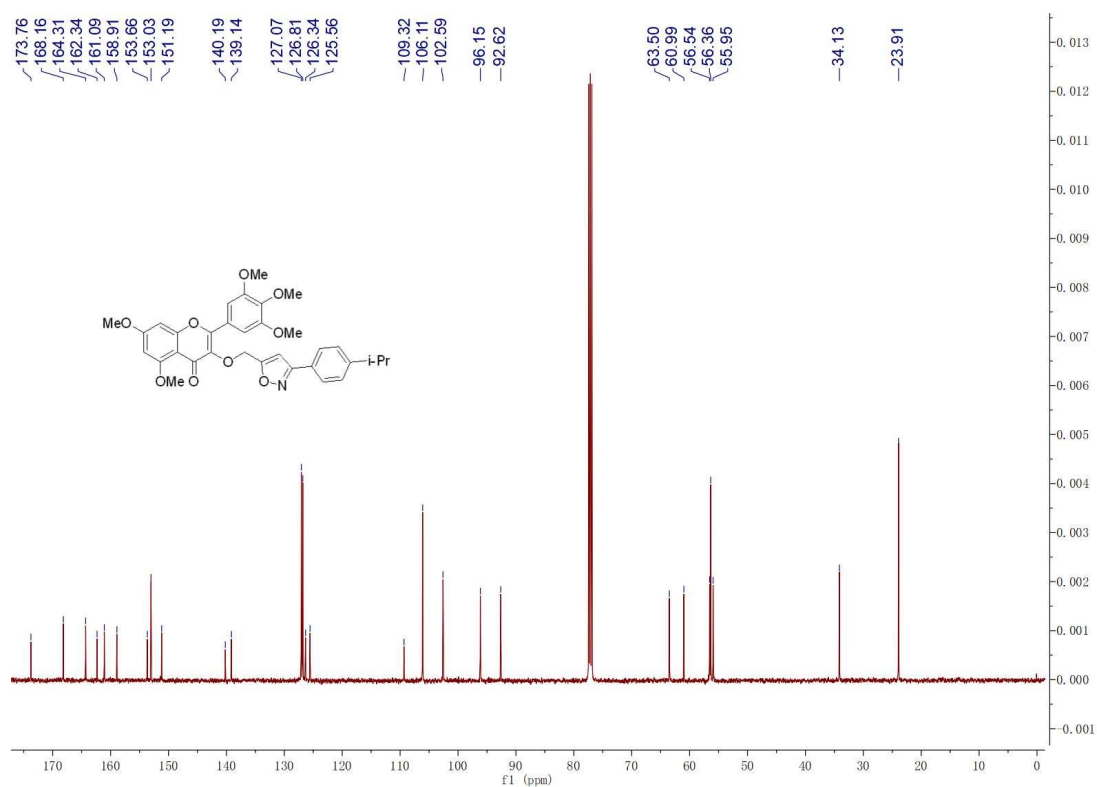

<sup>13</sup>C NMR spectra of compound Y27

24 #53 RT: 0.51 AV: 1 NL: 2.21E8  
T: FTMS + p ESI Full ms [100.0000-1300.0000]

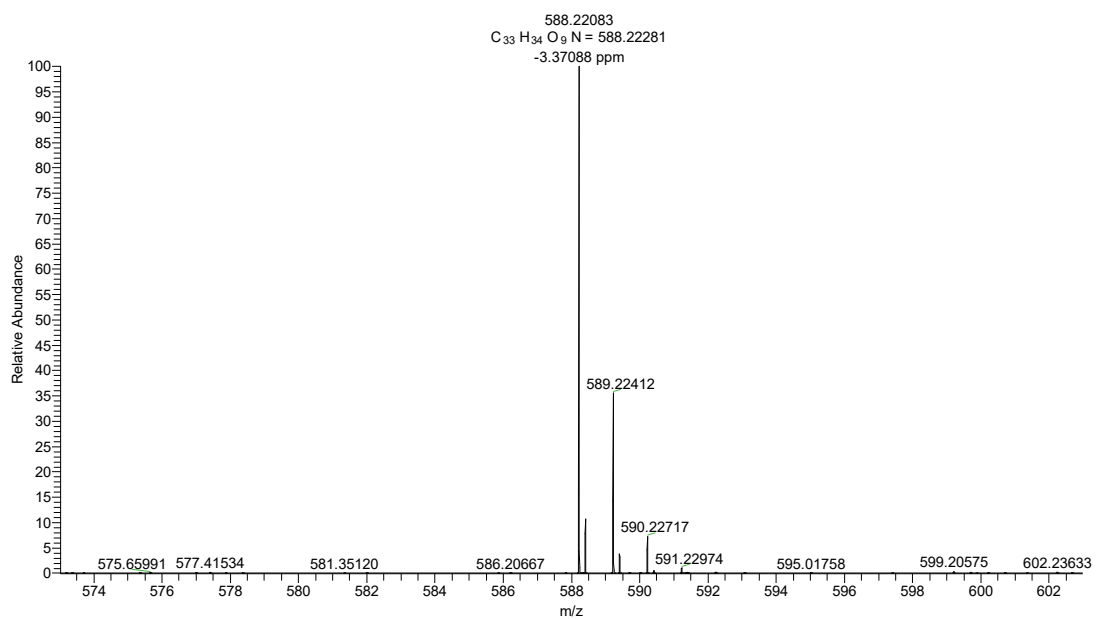

HRMS spectra of compound Y27

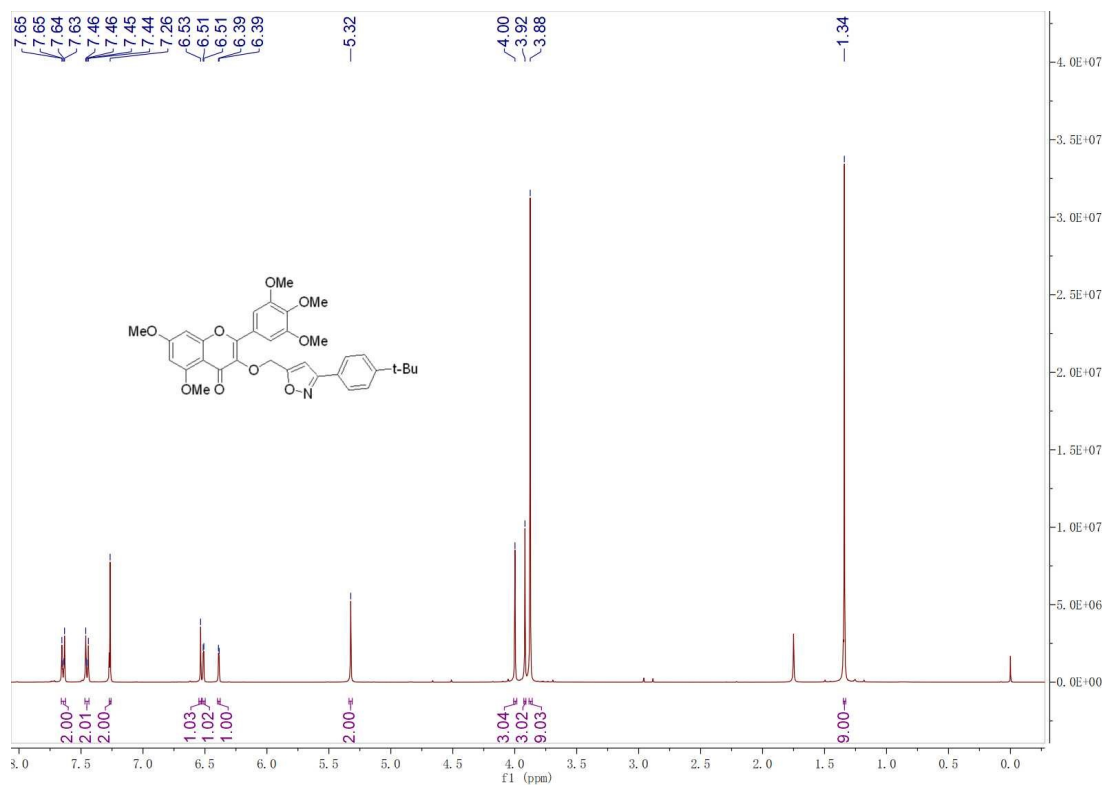

<sup>1</sup>H NMR spectra of compound Y28

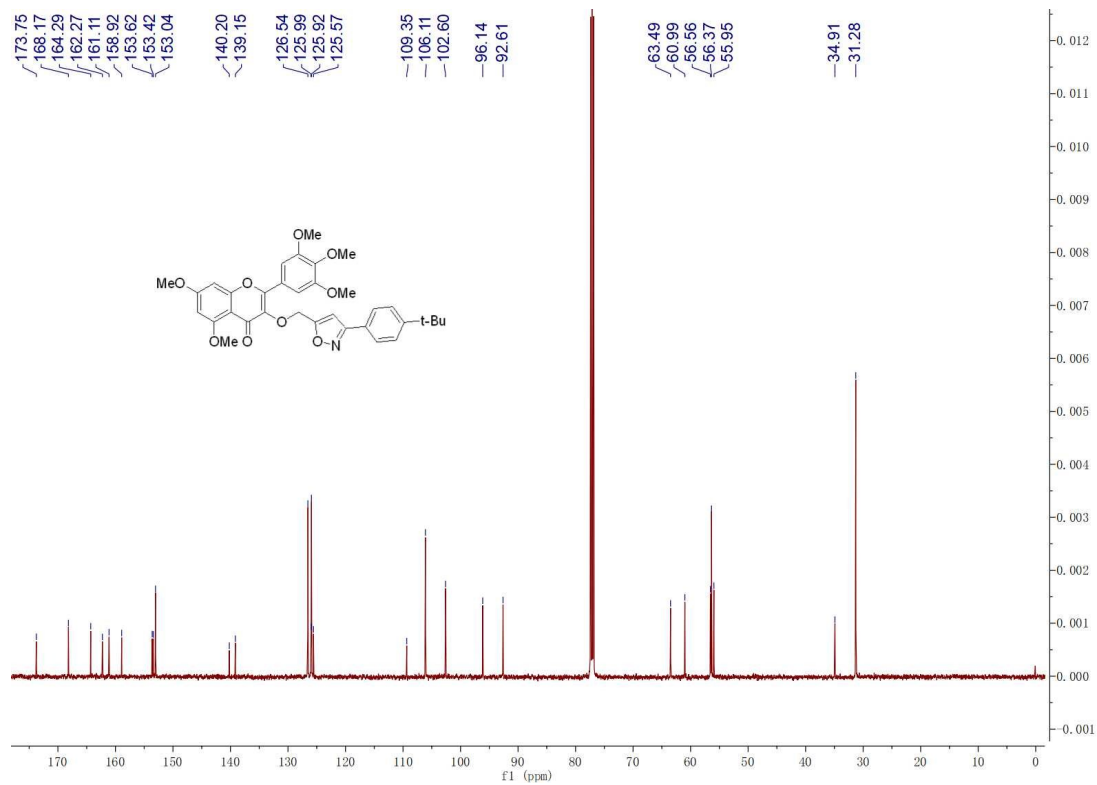

<sup>13</sup>C NMR spectra of compound Y28

25 #53 RT: 0.51 AV: 1 NL: 1.59E6  
T: FTMS + p ESI Full ms [100.0000-1300.0000]

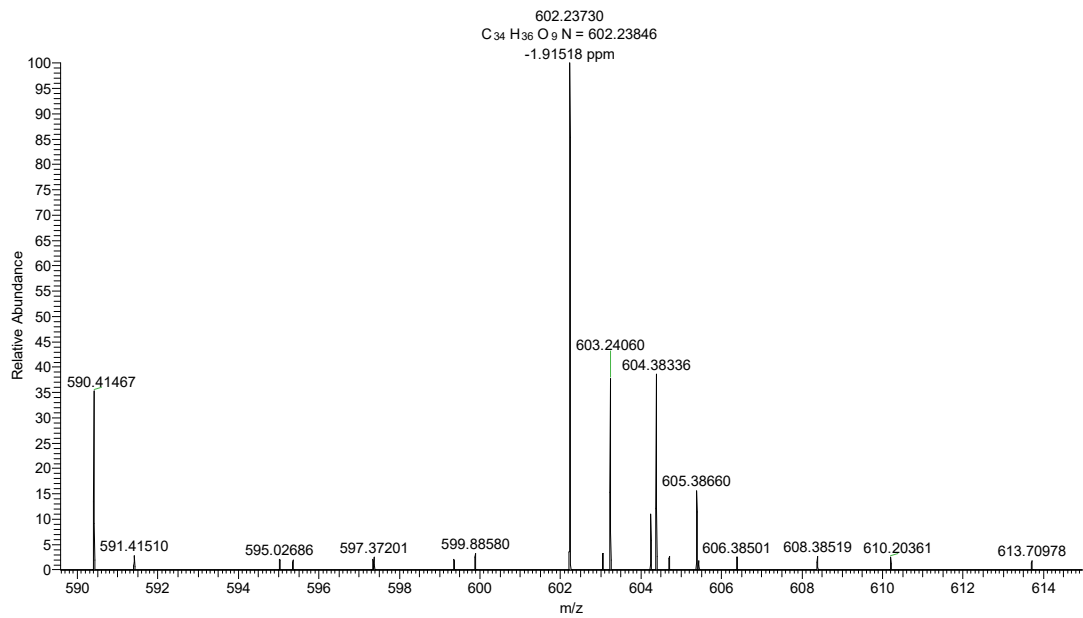

HRMS spectra of compound Y28



## 5. High performance liquid chromatography of target compound Y1

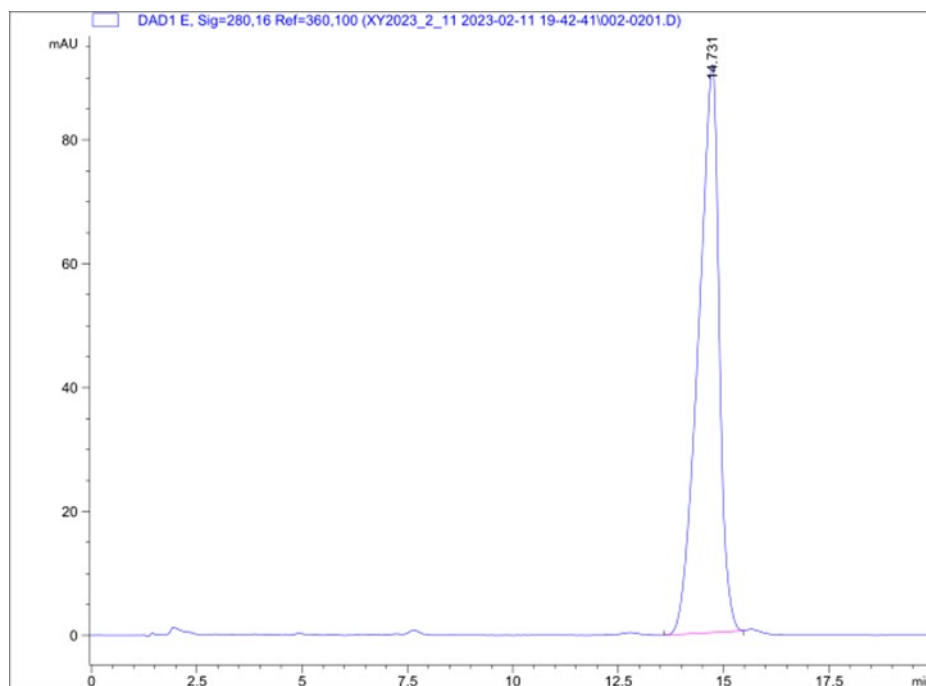

**Fig.S1** High performance liquid chromatography of Y1

## 6. Microstructure and appearance state diagram of target compound Y1

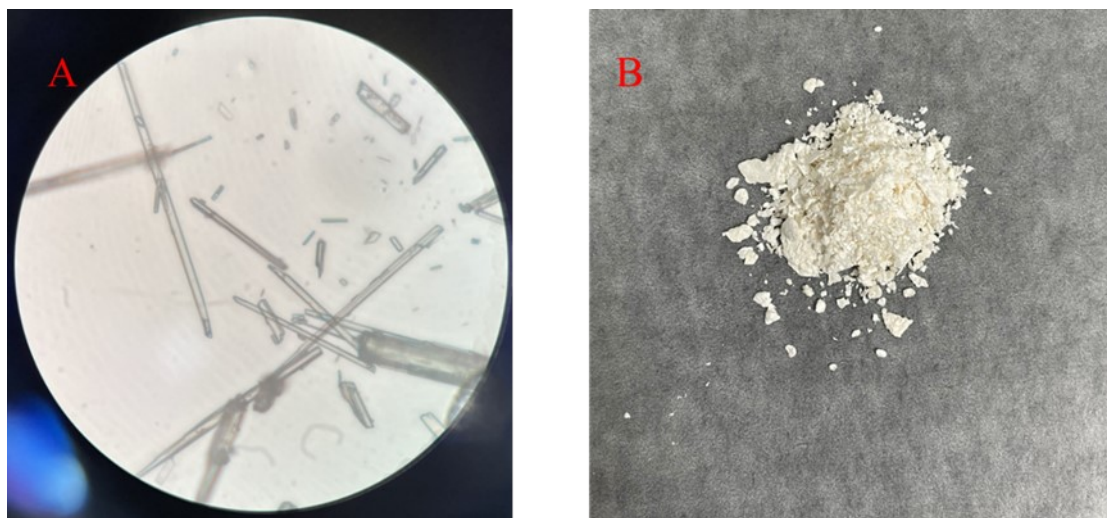

**Fig. S2** Microstructure and appearance state diagram of Y1  
(A: Microstructure diagram; B: Appearance state diagram)

## 7. Table S1. *In vitro* antifungal activity of target compounds Y1-Y28 at 100 µg/mL

Table S1. *In vitro* antifungal activity of target compounds Y1-Y28 at 100 µg/mL<sup>a</sup>

| Compd. | inhibition rate (%) |           |                        |           |           |           |           |           |           |                        |           |           |
|--------|---------------------|-----------|------------------------|-----------|-----------|-----------|-----------|-----------|-----------|------------------------|-----------|-----------|
|        | <i>Rs</i>           | <i>Bc</i> | <i>Pc</i> <sup>1</sup> | <i>Ss</i> | <i>Fg</i> | <i>Ps</i> | <i>Cc</i> | <i>Bd</i> | <i>Cg</i> | <i>Pc</i> <sup>2</sup> | <i>Fe</i> | <i>Fd</i> |
| Y1     | 30.6±1.1            | 32.0±2.7  | 38.0±2.8               | 43.6±9.9  | 14.1±4.9  | 9.9±3.5   | 16.9±1.8  | -         | 23.0±3.5  | 16.1±2.6               | 13.8±6.4  | 8.8±1.3   |
| Y2     | 40.4±1.8            | 33.6±3.1  | 34.9±4.7               | 14.4±5.4  | 8.1±1.4   | 13.3±4.0  | 17.3±3.7  | 28.3±9.1  | 27.9±3.0  | 14.0±1.1               | 38.3±6.8  | 5.3±1.0   |
| Y3     | 44.1±1.6            | 75.8±1.6  | 67.7±1.9               | 81.1±2.1  | 22.6±3.3  | 30.5±4.8  | 25.4±1.6  | 16.4±4.4  | 28.3±4.6  | 15.7±5.2               | 39.2±8.2  | 3.1±1.9   |
| Y4     | 43.7±1.4            | 38.1±4.7  | 36.7±5.9               | 54.5±7.7  | 26.6±4.9  | 5.6±9.1   | 10.9±5.4  | 29.9±9.7  | 35.3±2.2  | 28.1±4.6               | 38.8±5.8  | 8.4±1.9   |
| Y5     | 31.4±2.0            | 23.4±3.8  | 22.7±3.8               | 33.7±3.5  | 12.5±4.0  | 7.7±0.9   | 23.0±0.9  | -         | 19.3±2.0  | 11.6±1.1               | 27.9±7.1  | 4.0±1.2   |
| Y6     | 23.3±1.8            | 26.6±1.6  | 29.7±1.7               | 32.2±2.4  | 16.5±4.3  | 7.7±4.9   | 23.0±3.2  | -         | 28.6±5.7  | 14.9±2.7               | 40.4±5.1  | 6.6±1.9   |
| Y7     | 40.8±0.9            | 35.2±3.3  | 31.0±5.4               | 59.1±5.2  | 20.6±3.2  | 7.3±2.0   | 27.8±5.2  | -         | 18.2±1.6  | 12.4±1.1               | 23.8±3.4  | 5.3±1.8   |
| Y8     | 39.6±1.1            | 30.7±4.0  | 24.5±4.5               | 53.0±2.8  | 12.1±4.2  | 8.6±3.5   | 25.8±2.6  | -         | 18.6±1.1  | 12.4±1.8               | 34.6±6.8  | 6.6±1.2   |
| Y9     | 38.8±2.4            | 34.0±0.9  | 17.5±6.0               | 23.1±6.6  | 16.9±5.4  | 11.6±4.5  | 17.3±2.9  | -         | 25.3±4.0  | 19.4±4.1               | 36.3±5.4  | 4.8±1.5   |
| Y10    | 33.5±1.6            | 38.9±2.6  | 32.8±6.3               | 51.1±4.0  | 25.8±2.2  | 17.6±1.4  | 28.6±1.2  | -         | 21.2±1.0  | 14.0±3.3               | 39.6±4.1  | 6.2±1.3   |
| Y11    | 42.4±1.2            | 54.1±1.8  | 45.4±3.7               | 35.6±2.8  | 20.2±7.6  | 16.7±1.9  | 11.3±1.8  | -         | 23.4±2.1  | 8.3±2.0                | 30.8±4.6  | 3.1±2.8   |
| Y12    | 33.9±3.4            | 37.3±4.3  | 33.6±7.8               | 45.8±2.4  | 16.5±3.3  | 15.0±2.5  | 9.3±7.6   | -         | 23.4±1.6  | 12.4±3.0               | 32.1±9.0  | 2.2±2.1   |
| Y13    | 42.0±1.8            | 36.1±2.0  | 27.1±2.7               | 47.0±9.4  | 12.9±2.7  | 24.0±4.3  | 16.9±2.9  | 15.6±2.7  | 25.3±1.7  | 15.7±2.0               | 30.8±1.1  | 6.2±1.3   |
| Y14    | 30.2±2.3            | 39.3±5.7  | 45.4±4.5               | 44.3±2.8  | 12.1±2.6  | 13.7±3.1  | 14.9±0.9  | 1.2±6.7   | 27.9±3.0  | 16.1±2.6               | 33.3±3.0  | 2.2±1.5   |
| Y15    | 31.0±1.6            | 32.8±7.2  | 36.7±4.0               | 20.5±2.6  | 9.7±4.7   | 3.9±2.8   | 10.9±2.1  | -         | 22.7±2.7  | 15.3±1.7               | 44.6±2.2  | 4.8±1.5   |
| Y16    | 35.9±2.1            | 33.6±3.9  | 40.2±7.1               | 53.8±6.4  | 26.2±3.5  | 23.2±3.4  | 15.7±7.5  | 24.2±7.8  | 26.8±0.8  | 19.4±2.7               | 34.2±4.8  | 10.1±4.2  |

**Table S1.** *In vitro* antifungal activity of target compounds **Y1-Y28** at 100 µg/mL (continued Table)

| Compd.            | inhibition rate (%) |           |                        |           |           |           |           |           |           |                        |           |           |
|-------------------|---------------------|-----------|------------------------|-----------|-----------|-----------|-----------|-----------|-----------|------------------------|-----------|-----------|
|                   | <i>Rs</i>           | <i>Bc</i> | <i>Pc</i> <sup>1</sup> | <i>Ss</i> | <i>Fg</i> | <i>Ps</i> | <i>Cc</i> | <i>Bd</i> | <i>Cg</i> | <i>Pc</i> <sup>2</sup> | <i>Fe</i> | <i>Fd</i> |
| <b>Y17</b>        | 27.3±1.1            | 38.9±1.6  | 48.9±3.2               | 55.7±1.1  | 25.0±2.6  | 7.7±2.7   | 3.6±0.9   | 17.6±4.9  | 26.8±3.0  | 9.9±2.3                | 48.3±2.7  | 3.1±3.5   |
| <b>Y18</b>        | 30.6±1.1            | 42.6±2.3  | 39.7±1.5               | 31.1±3.1  | 16.1±8.3  | 3.4±4.0   | 1.2±2.1   | -         | 24.9±3.7  | 27.3±4.6               | 32.1±4.7  | 11.5±2.0  |
| <b>Y19</b>        | 36.3±1.4            | 49.2±1.8  | 43.2±2.4               | 48.1±5.2  | 23.0±5.2  | 20.6±1.7  | 17.7±2.4  | -         | 23.0±1.7  | 17.4±9.0               | 38.8±3.9  | 15.0±1.8  |
| <b>Y20</b>        | 30.6±1.1            | 39.3±4.1  | 40.6±1.2               | 33.7±4.7  | 19.4±2.2  | 15.0±4.6  | 16.9±2.2  | 13.5±5.6  | 23.0±2.5  | 14.5±2.7               | 33.8±5.8  | 7.9±2.3   |
| <b>Y21</b>        | 33.5±3.2            | 31.1±2.0  | 45.0±1.5               | 54.9±2.4  | 16.9±5.4  | 14.2±1.9  | 8.5±2.5   | 39.3±1.8  | 16.7±1.0  | 19.4±4.6               | 42.5±6.1  | 3.1±1.9   |
| <b>Y22</b>        | 38.0±1.8            | 38.1±2.6  | 54.1±3.2               | 40.2±4.4  | 17.7±11   | 12.0±2.7  | 33.1±4.0  | 11.1±2.6  | 31.6±2.7  | 26.8±4.4               | 35.4±6.7  | 4.8±1.5   |
| <b>Y23</b>        | 42.0±2.3            | 28.7±2.0  | 39.7±2.5               | 50.8±8.1  | 25.0±4.5  | 21.9±2.4  | 34.3±3.2  | 13.1±3.3  | 33.8±3.7  | 19.8±6.0               | 42.9±2.6  | 8.8±3.5   |
| <b>Y24</b>        | 39.6±2.3            | 21.3±3.1  | 54.1±5.8               | 32.2±2.4  | 8.9±3.8   | 7.3±2.9   | 21.8±5.9  | -         | 20.8±1.1  | 12.8±5.5               | 40.4±4.7  | 8.4±4.1   |
| <b>Y25</b>        | 42.0±1.1            | 34.0±2.6  | 28.8±2.7               | 36.0±5.4  | 15.7±2.5  | 5.2±1.7   | 3.6±2.1   | -         | 18.6±1.1  | 5.4±3.8                | 41.3±10   | 5.7±1.2   |
| <b>Y26</b>        | 49.4±1.8            | 48.4±2.1  | 19.6±3.9               | 22.6±1.2  | 5.9±3.9   | 7.4±4.0   | 14.7±3.8  | 8.5±1.7   | 27.1±2.7  | 12.0±2.7               | 52.9±5.0  | 11.5±2.0  |
| <b>Y27</b>        | 51.0±2.0            | 28.7±8.4  | 52.2±2.2               | 34.1±7.8  | 5.5±1.3   | 14.7±3.0  | 18.1±3.9  | 53.9±2.6  | 24.9±2.4  | 24.8±1.8               | 20.8±5.4  | 23.3±5.3  |
| <b>Y28</b>        | 47.8±3.6            | 47.6±2.8  | 23.9±1.1               | 42.0±7.5  | 10.5±3.9  | 27.0±2.6  | 19.7±2.1  | -         | 23.0±2.8  | 20.2±7.9               | 48.8±3.1  | 5.7±1.2   |
| Myr. <sup>b</sup> | 31.0±2.1            | 36.5±2.9  | 41.0±3.2               | 38.3±2.4  | 19.4±1.8  | 16.7±2.4  | 16.1±2.6  | -         | 20.8±3.5  | 6.6±1.8                | 25.0±5.3  | 2.6±1.8   |
| Krm <sup>b</sup>  | 70.2±3.5            | 69.3±2.3  | 61.6±5.6               | 62.8±3.2  | 48.0±4.3  | 49.4±5.3  | 63.3±1.6  | 52.0±4.1  | 62.8±1.0  | 69.8±3.8               | 72.5±3.7  | 31.3±4.9  |
| Azo <sup>b</sup>  | 93.9±1.7            | 96.3±3.0  | 63.6±2.1               | 70.3±1.2  | 43.3±1.3  | 50.6±2.7  | 50.8±2.9  | 66.0±1.7  | 44.0±2.0  | 76.3±2.6               | 60.0±5.3  | 53.8±3.9  |

<sup>a</sup>: The average of three trials; <sup>b</sup>: the lead compound myricetin (Myr); commercial antifungal agents kresoxim-methyl (Krm) and azoxystrobin (Azo).
